# Supplementary material
Source: PubMed Central journal article supplement (PMC3090658)
Supplement: NIHMS283893-supplement-supplement_1.pdf [file NIHMS283893-supplement-supplement_1.pdf]

## ONLINE METHODS

**Noncompetitive and competitive transplants.** We performed noncompetitive transplants with bone marrow from 6- to 10-week-old F1 B6/129 *MSI2* inducible mice or rtTA littermate controls into B6SJL congenic CD45.1<sup>+</sup> recipients (Taconic Transgenics). We performed competitive transplants with 6- to 10-week-old F1 B6/129 *MSI2* bone marrow mixed with wild-type competitor control (CD45.1<sup>+</sup>) bone marrow at 1:1 or 3:1 ratios for a total of 1 million cells injected. We allowed the marrow to engraft for 4–6 weeks before administering doxycycline and assessing peripheral blood chimerism. The chimerism ratio was calculated by taking the percentage of CD45.2<sup>+</sup> cells for each mouse and normalizing it to the percentage of CD45.2<sup>+</sup> cells before doxycycline administration (Fig. 2h). The protocol was approved by the Institutional Animal Care and Use Committee (IACUC) at both the Massachusetts Institute of Technology and Children's Hospital Boston.

**Colony-forming assays.** Bone marrow and spleen cells were isolated, subjected to red cell lysis and resuspended in Iscove's modified Dulbecco's medium (IMDM) plus 10% FBS plus 5% (100 IU ml<sup>-1</sup>) penicillin-streptomycin. (Cambrex, Biowhittaker). We plated cells in duplicate into M3434 methylcellulose medium (Stem Cell Technologies) at 1 × 10<sup>4</sup> cells per dish for bone marrow and 5 × 10<sup>4</sup> cells per dish for spleen cells. Colonies were scored after 7 d if at least 25 distinct colonies were observed per dish; the cells were replated in M3434 media at 1 × 10<sup>4</sup> cells per dish and then counted and replated every 7 d. Single-cytokine methylcellulose analysis was performed as described above with M3231 (Stem Cell Technologies), interleukin-3 (10 ng ml<sup>-1</sup>) or granulocyte-macrophage colony-stimulating factor (20 ng ml<sup>-1</sup>, Peprotech).

**Western blotting.** Whole-cell protein lysates were prepared from single-cell suspensions of splenocytes or cell lines. Immunoblotting was performed as previously described<sup>31</sup>. Antibodies used were pan-MSI (Cell Signaling Technologies, cat. no. 2154) and antibodies specific for MSI1 (Chemicon, cat. no. AB5977), glyceraldehyde-3-phosphate dehydrogenase (Santa Cruz, cat. no. sc-32233) and GATA-2 transcription factor (Santa Cruz, cat. no. Sc267).

**Short hairpin RNA lentiviral acute myeloid leukemia and chronic myeloid leukemia cell line experiments.** We transduced LAMA-84 and THP-1 (the German Collection of Microorganisms and Cell Cultures and Nomo1 and AR230 (gifts from S. Armstrong) with various pLKO.1puro lentiviral shRNA vectors targeting *MSI2* or a scrambled control shRNA as previously described<sup>32</sup>. We purchased *MSI2*-specific short hairpins through Open Biosystems: *MSI2*-1, 5'-CCCAACTTCGTGGCGACCTAT-3' (TRCN62811); *MSI2*-2, 5'-CCAGCAAGTGTAGATAAAGTA-3' (TRCN62808). RNA was isolated after 3 d of puromycin selection, and gene expression was profiled with the G4112F whole-human genome microarray (Agilent).

**Human CD34<sup>+</sup> expansion.** We thawed and plated human cord blood in serum free expansion medium (SFEM, StemCell Technology) medium with human cytokines Flt3 40 ng ml<sup>-1</sup>, 100 ng ml<sup>-1</sup> SCF and 50 ng ml<sup>-1</sup> thrombopoietin (all from R&D Systems) for 5 d.

***Msi2* knockdown.** LSK cells from C57BL/6 mice were sorted and cultured in SFEM supplemented with 10 μg ml<sup>-1</sup> heparin (Sigma), 10 ng ml<sup>-1</sup> mouse SCF, 20 ng ml<sup>-1</sup> thrombopoietin, insulin-like growth factor-2, (all from R&D Systems), 10 ng ml<sup>-1</sup> human fibroblast growth factor-1 (Invitrogen) (STIF medium) at a concentration of 1 × 10<sup>5</sup> cells into a 96-well round bottom plate. LSK cells were infected twice at 24 and 48 h after sorting, and the percentage EGFP<sup>+</sup> cells was assessed before injection into syngeneic C57BL/6 mice with pSicoR Scramble and *Msi2* hairpins. We analyzed mice 6 weeks after engraftment.

**Homing assay.** Bone marrow cells from C57BL/6 mice were lineage-depleted (Lin<sup>-</sup>) with Dynal beads (Invitrogen), cultured in STIF medium and infected as before with *Msi2*-specific shRNAs. Mice were lethally irradiated 72 h before transplantation and assessed for infection efficiency, and 3 × 10<sup>6</sup> cells were injected per mouse. Bone marrow was collected 17 h after injection and analyzed for EGFP homing.

**Numb asymmetric immunofluorescence.** We allowed mice to engraft for 6–10 weeks and then administered doxycycline to rtTA or *MSI2*-expressing mice for 5 d. LSKs were then sorted and cultured with STIF medium in 96-well round bottom plates for 16 h and treated with 10 nM of nocodazole (Sigma) for 24 h. We cytospun, fixed, methanol permeabilized and stained the cells with a Numb-specific antibody (Ab4147, Abcam) and goat-specific IgG Alexa Fluor 546-conjugated secondary antibody (Mol Probes) and counterstained with DAPI<sup>14</sup>. We determined symmetric versus asymmetric staining patterns on the basis of visual inspection of Numb only in cells undergoing division. Cells with an ambiguous staining pattern were omitted from our analysis.

**Phospho-ERK analysis.** Mice that were transplanted with *MSI2*-expressing marrow were administered doxycycline for 5 d, followed by isolation of Lin<sup>-</sup> cells, which were then serum starved for 1 h and stimulated with 100 μg ml<sup>-1</sup> SCF. Cells were then fixed, permeabilized and stained for LSKs as described previously<sup>33</sup>.

**Statistical analyses.** We computed *P* values for bar graphs with the unpaired two-tailed Student's *t* test, except where stated otherwise. Error bars reflect the s.e.m., except where stated otherwise. All statistical analyses were carried out with GraphPad Prism 4.0 and the R statistical environment. The prognostic value of *MSI2* was determined by comparing overall survival of *MSI2* expression-defined groups with Kaplan-Meier survival analysis.

**Additional methods.** Detailed methodology is described in the **Supplementary Methods**.

- Rocnik, J.L. *et al.* Roles of tyrosine 589 and 591 in STAT5 activation and transformation mediated by FLT3-ITD. *Blood* **108**, 1339–1345 (2006).
- Scholl, C. *et al.* Synthetic lethal interaction between oncogenic KRAS dependency and STK33 suppression in human cancer cells. *Cell* **137**, 821–834 (2009).
- Kalaitzidis, D. & Neel, B.G. Flow-cytometric phosphoprotein analysis reveals agonist and temporal differences in responses of murine hematopoietic stem/progenitor cells. *PLoS One* **3**, e3776 (2008).

## Supplementary Materials

### **Musashi-2 regulates normal hematopoiesis and promotes aggressive myeloid leukemia**

Michael G Kharas<sup>1,2,15</sup>, Christopher J Lengner<sup>3,15</sup>, Fatima Al-Shahrour<sup>1,4</sup>, Lars Bullinger<sup>5</sup>, Brian Ball<sup>1</sup>, Samir Zaidi<sup>6</sup>, Kelly Morgan<sup>1</sup>, Winnie Tam<sup>1</sup>, Mahnaz Paktinat<sup>1</sup>, Rachel Okabe<sup>1</sup>, Maricel Gozo<sup>1</sup>, William S Einhorn<sup>1,7</sup>, Steven W Lane<sup>7</sup>, Claudia Scholl<sup>5</sup>, Stefan Fröhling<sup>5</sup>, Mark D. Fleming<sup>8</sup>, Benjamin L Ebert<sup>1,2</sup>, D Gary Gilliland<sup>1,2,9</sup>, Rudolf Jaenisch<sup>3,6</sup> & George Q Daley<sup>1,2,7,10-14</sup>

<sup>1</sup>Division of Hematology, Department of Medicine, Brigham and Women's Hospital, Boston, Massachusetts, USA. <sup>2</sup>Harvard Medical School, Boston, Massachusetts, USA. <sup>3</sup>Whitehead Institute for Biomedical Research, Cambridge, Massachusetts, USA. <sup>4</sup>Broad Institute of Massachusetts Institute of Technology and Harvard, Cambridge, Massachusetts, USA. <sup>5</sup>Department of Internal Medicine III, University Hospital of Ulm, Ulm, Germany. <sup>6</sup>Department of Biology, Massachusetts Institute of Technology, Cambridge, Massachusetts, USA. <sup>7</sup>Division of Pediatric Hematology/Oncology, Children's Hospital, Boston, Massachusetts, USA. <sup>8</sup>Department of Pathology, Children's Hospital and Harvard Medical School, Boston, MA 02115, USA. <sup>9</sup>Merck Research Laboratories, North Wales, Pennsylvania, USA. <sup>10</sup>Howard Hughes Medical Institute, Boston, Massachusetts, USA. <sup>11</sup>Department of Biological Chemistry and Molecular Pharmacology, Harvard Medical School, Boston, Massachusetts, USA. <sup>12</sup>Stem Cell Transplantation Program, Children's Hospital and Dana Farber Cancer Institute, Boston, Massachusetts, USA. <sup>13</sup>Harvard Stem Cell Institute, Cambridge, Massachusetts, USA. <sup>14</sup>Manton Center for Orphan Disease Research, Children's Hospital, Boston, Massachusetts, USA. <sup>15</sup>These authors contributed equally to this work.

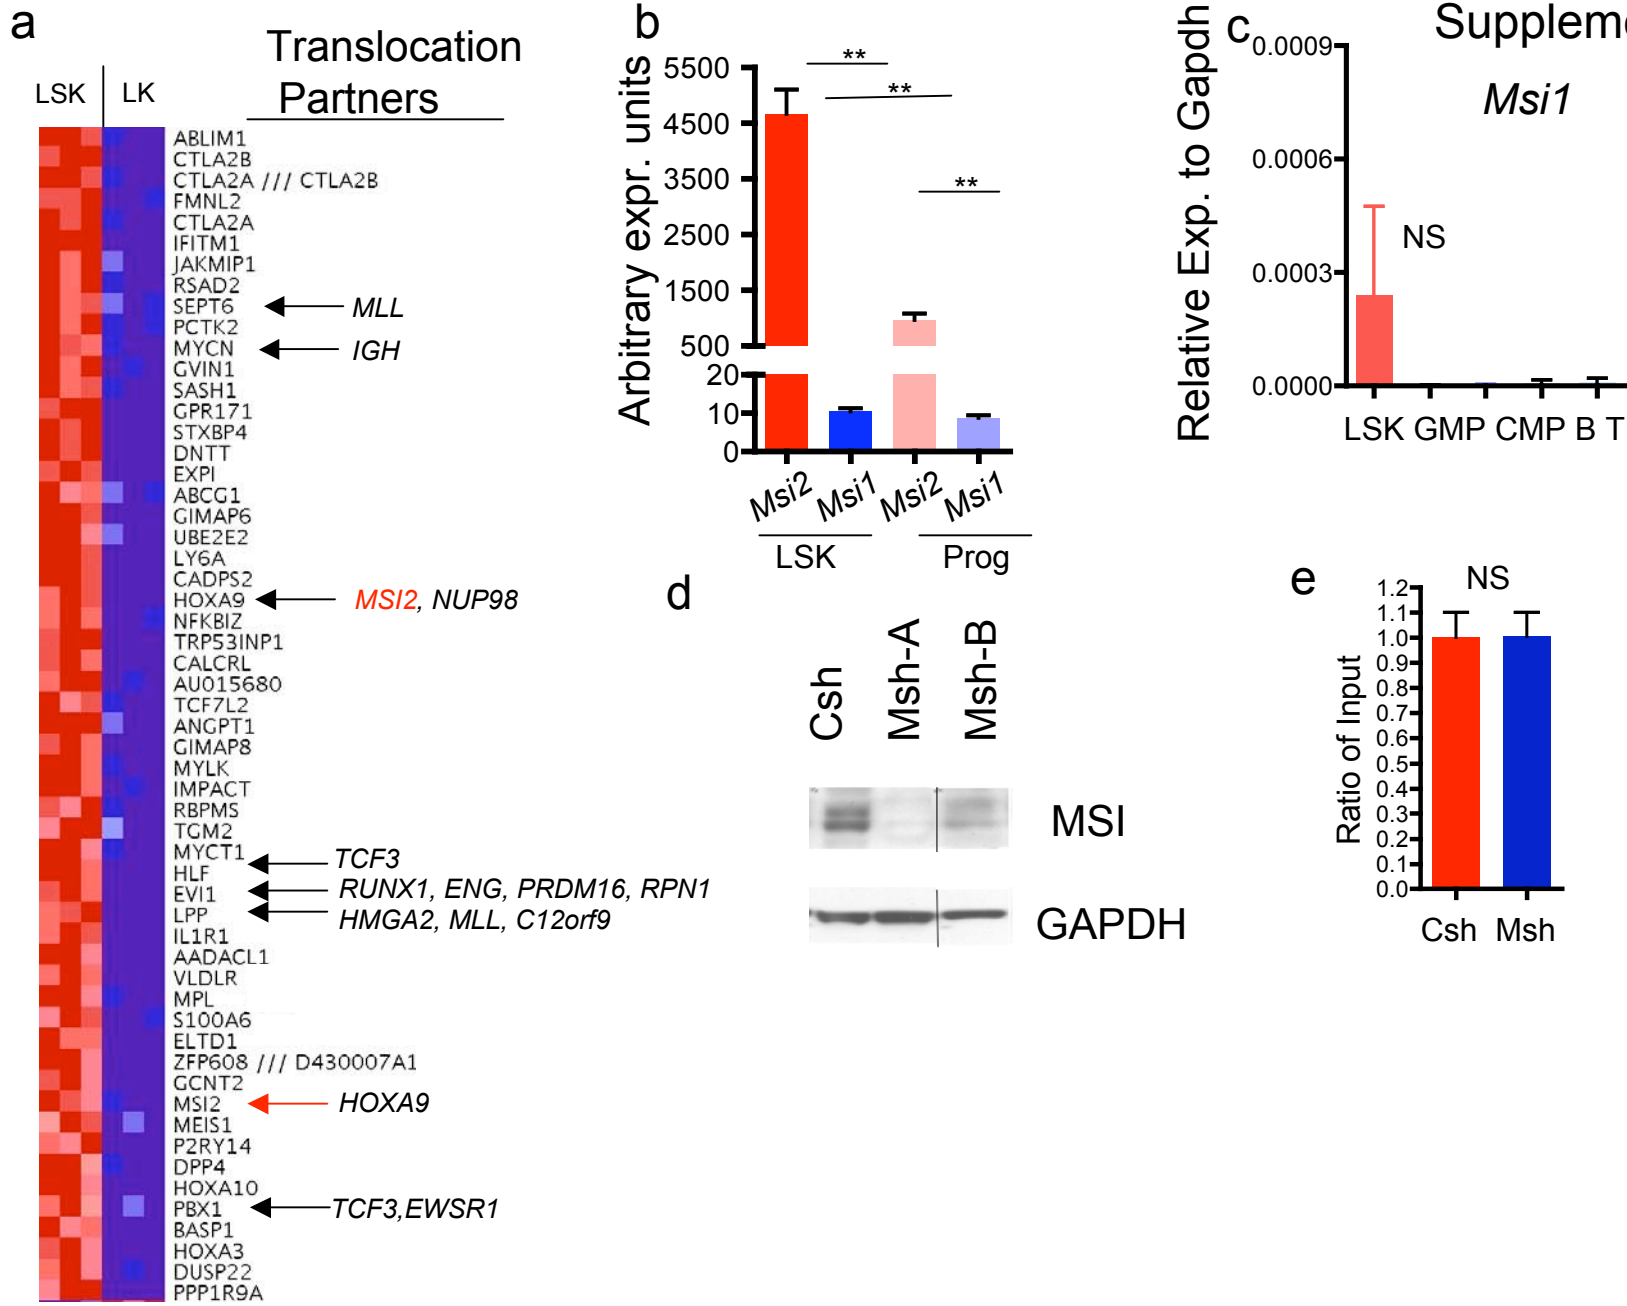

**Supplementary Figure 1: Gene Expression Profiling in mouse adult bone marrow hematopoietic cells and *Msi2* knockdown.** **a**, Murine LSK and LK cells were FACS purified followed by transcriptome analysis by microarray. Genes differentially expressed were ranked based on fold change and with an FDR less than 0.7. Arrows indicate genes preferentially expressed in LSK cells that are also known to be involved in chromosomal translocations observed in human hematopoietic cancers. Highlighted in red are translocations identified with *MSI2*. **b**, Gene expression from microarray from **a** (Arbitrary expression units in triplicates). **c**, QRT-PCR analysis and relative expression normalized to GAPDH in indicated sorted populations. **d**, Immunoblot in which human K562 CML cells were transduced with indicated vectors harboring two distinct hairpins targeting *MSI2* and co-expressing EGFP. Cells were sorted for EGFP expression and lysates blotted with indicated antibodies. *Msh-A* and *Msh-B* hairpins target both mouse and human *MSI2*. **e**, Lin<sup>-</sup> magnetically sorted bone marrow cells grown in cytokines for 72 hours and transduced with EGFP-expressing vectors containing Scramble (Csh) hairpins or hairpins targeting *MSI2* (Msh). EGFP<sup>+</sup> cells were transplanted into lethally irradiated recipient mice which were then sacrificed 17 hours post transplant and the ratio of EGFP<sup>+</sup>:EGFP<sup>-</sup> cells in the bone marrow was calculated and normalized to the ratio in the donor cell population indicating that both *MSI2* knockdown did not affect stem cell homing (ns= no significant difference, n=5 scramble, n=5 *MSI2*, n=5 *MSI2*, NS= not significant, \*\*=p<0.001, \*=p<0.01 and + =p<0.05)).

## Supplementary Fig. 2

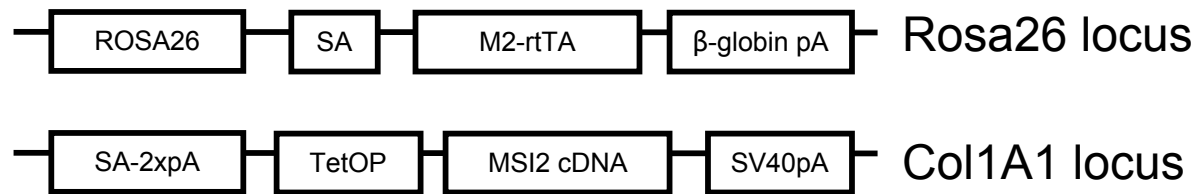

**Supplementary Figure 2: Targeted MSI2-inducible expression system.** Schematic of dox-inducible single copy transgenic system in which the M2 reverse tetracycline transactivator (M2rtTA) is constitutively expressed from the ROSA26 locus and the human *MSI2* cDNA under control of the tetracycline operator and promoter (TetOP) is targeted downstream of the Type I Collagen (Coll) locus. SA, splice acceptor; pA, polyadenylation signal.

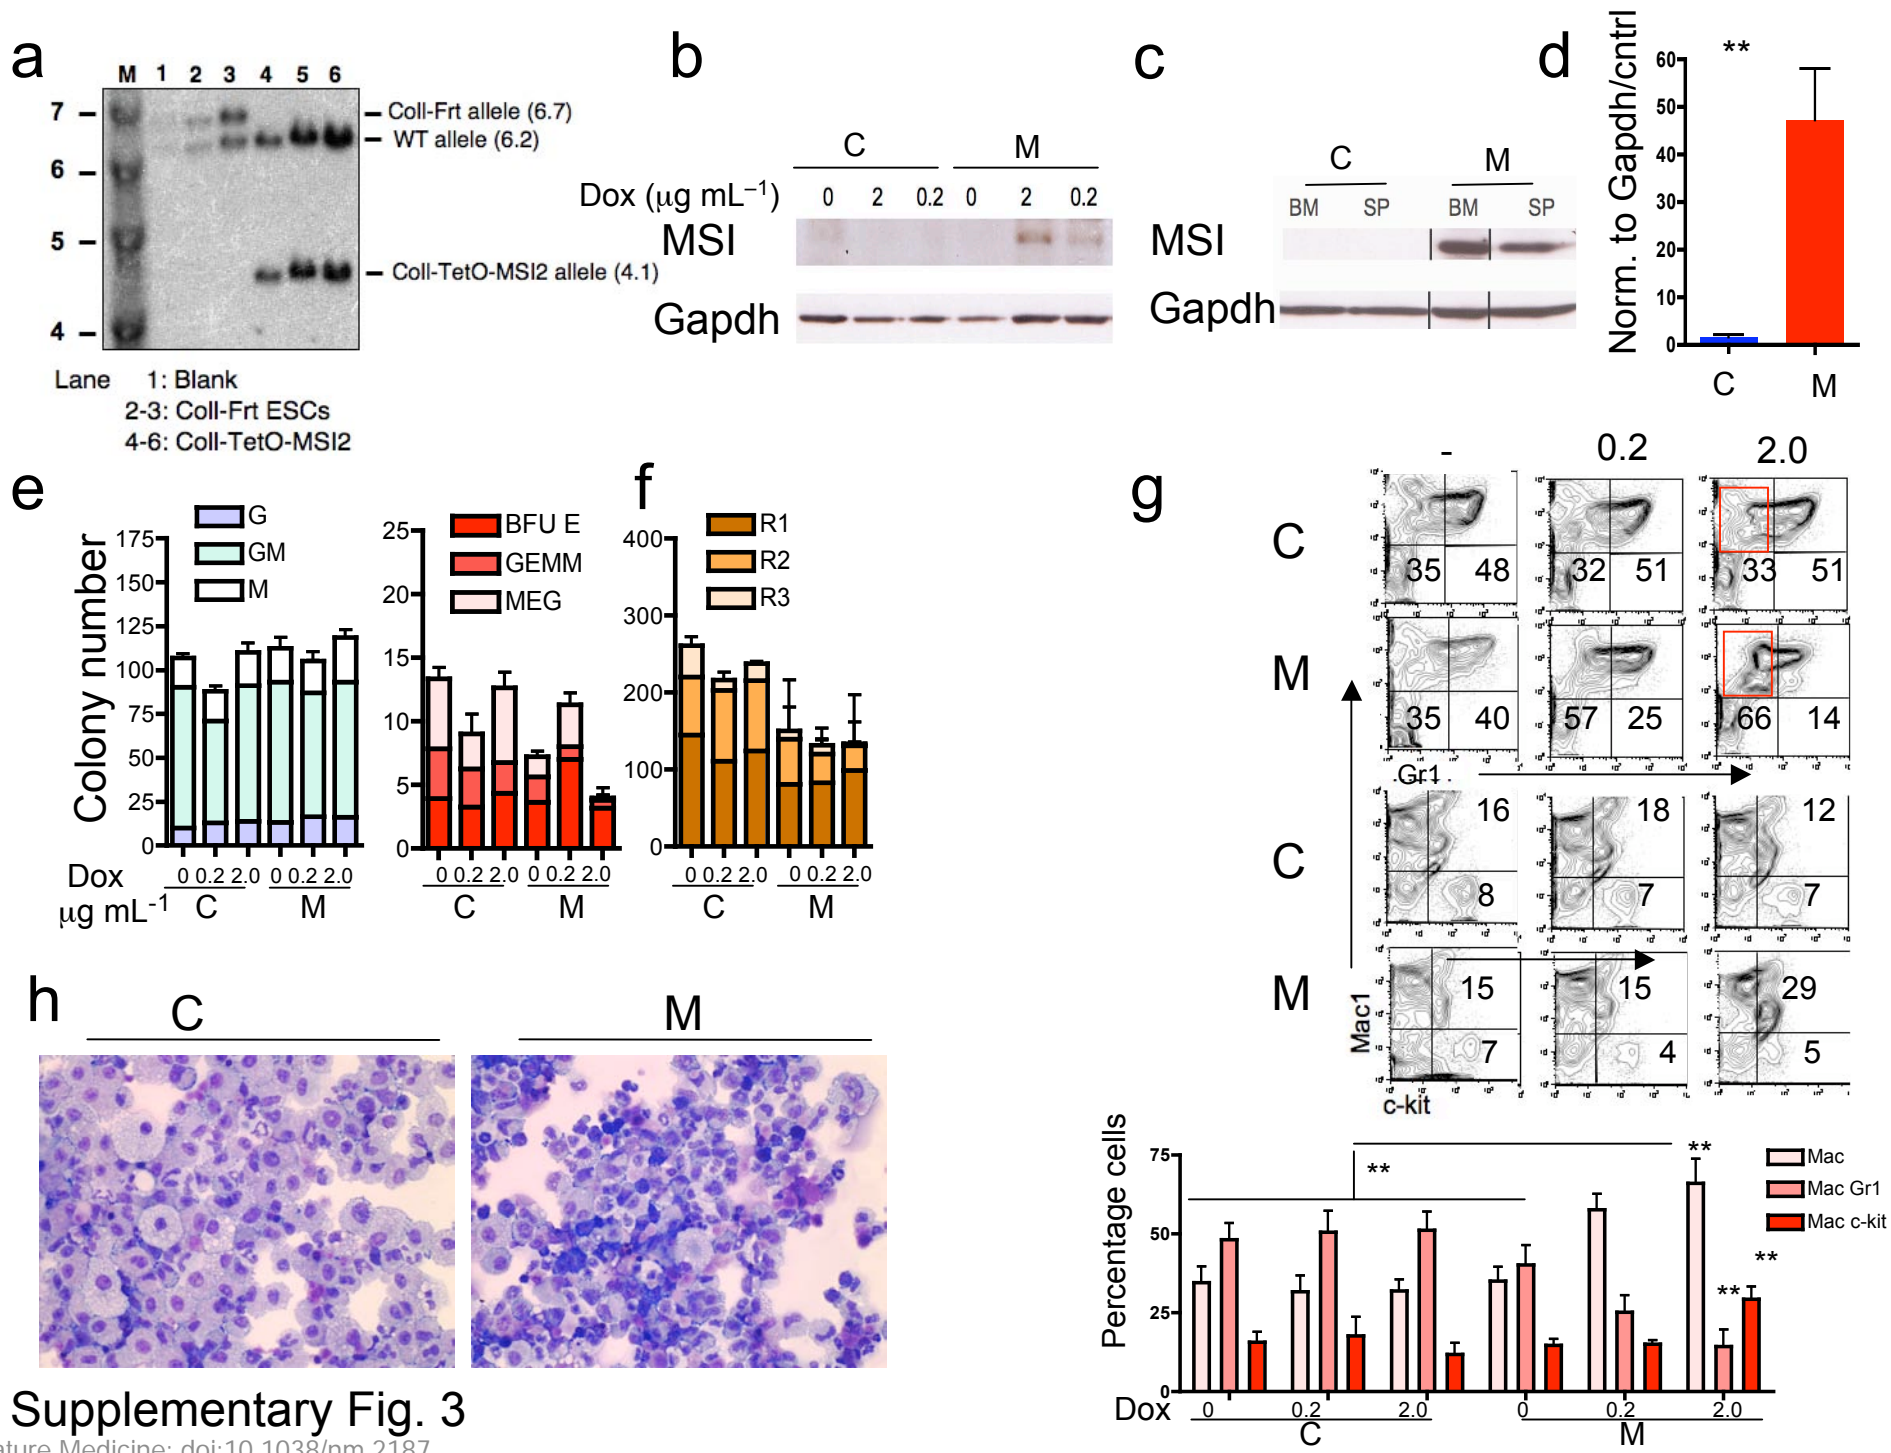

Supplementary Fig. 3

Supplementary Fig. 3

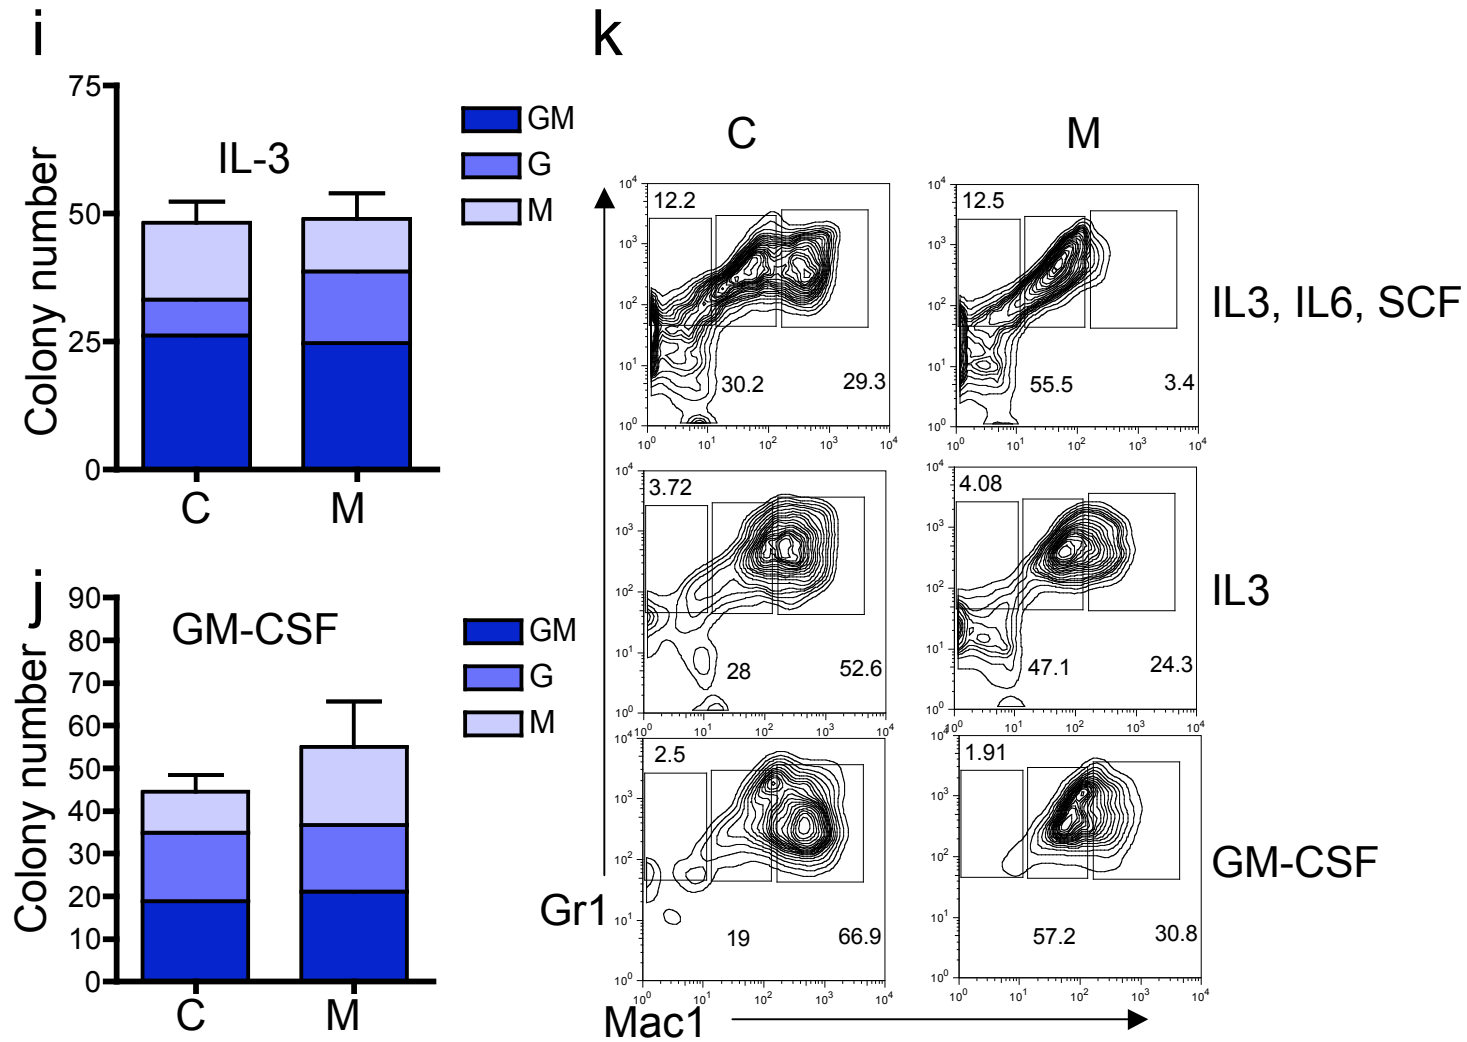

**Supplementary Figure 3: Inducible expression of MSI2 *in vitro* attenuates myeloid differentiation.** **a**, Southern blot analysis of genomic DNA from embryonic stem cell clones digested with SpeI demonstrating correct targeting of the Coll locus. **b**, Immunoblotting for MSI2 in control (C; ROSA26 rtTA) and MSI2 inducible (M; ROSA26rtTA, Coll-TetO-*MSI2*) bone marrow cells cultured with cytokines for 24hrs with indicated doses of dox (in  $\mu\text{g}/\text{mL}$ ). **c**, Inducible MSI2 expression *in vivo* in indicated tissues after mice were administered 2 mg/mL dox for five days in the drinking water. **d**, Transplanted MSI2 inducible mice were treated with dox for 36 hours and LSKs were flow sorted. *MSI2* expression was determined by quantitative RT-PCR, relative to Gapdh (Representative of n=5 (C), and n=3 *MSI2* (M) induced LSKs, s.e.m.  $**p<0.001$ ). **e**, Methylcellulose colony-forming cells from the bone marrow were scored at 7 days post plating for indicated colony types [Granulocyte (G), Granulocyte Monocyte (GM), Monocyte (M), Burst forming Unit Erythroid (BFU-E), Megakaryocyte (MEG)] (error bars represent s.e.m. with indicated dox concentration in  $\mu\text{g}/\text{mL}$ ). **f**, colonies were harvested and replated into methycellulose and counted over three rounds of replating (R1, R2 and R3) (differences between control (C) and MSI2-induction (M) were not statistically significant; n= at least 4 experiments). **g**, Methylcellulose colonies were analyzed by flow cytometry with indicated parameters after 1<sup>st</sup> round of replating (top panels: Mac1 vs. Gr1, red box indicates gate on the Mac1 population. Lower panels are representative Mac1 vs. c-Kit flow plots representative from at least 3 experiments, red box indicates gate on the Mac<sup>+</sup>c-Kit<sup>+</sup> population. Data are quantified in bar graph at the bottom of the panel (\*\*  $p<0.001$ ). **h**, Histological analysis of cytopspins stained with hematoxylin and eosin from 1<sup>st</sup> round of replating and representative image from 3 independent experiments. **i–j**, Methylcellulose colony-forming cells from the bone marrow were scored at 7 days post plating for indicated colony types as in **e** with only IL-3 (10ng/mL) or GM-CSF and (error bars represent s.e.m two independent experiments n=3 per genotype). **k**, Methylcellulose colonies were analyzed by flow cytometry with indicated parameters after 1<sup>st</sup> round of replating as in **g**. Data are representative of 2 independent experiments with n=3 per genotype, NS= not significant,  $**=p<0.001$ ,  $*=p<0.01$  and  $+ =p<0.05$ ).



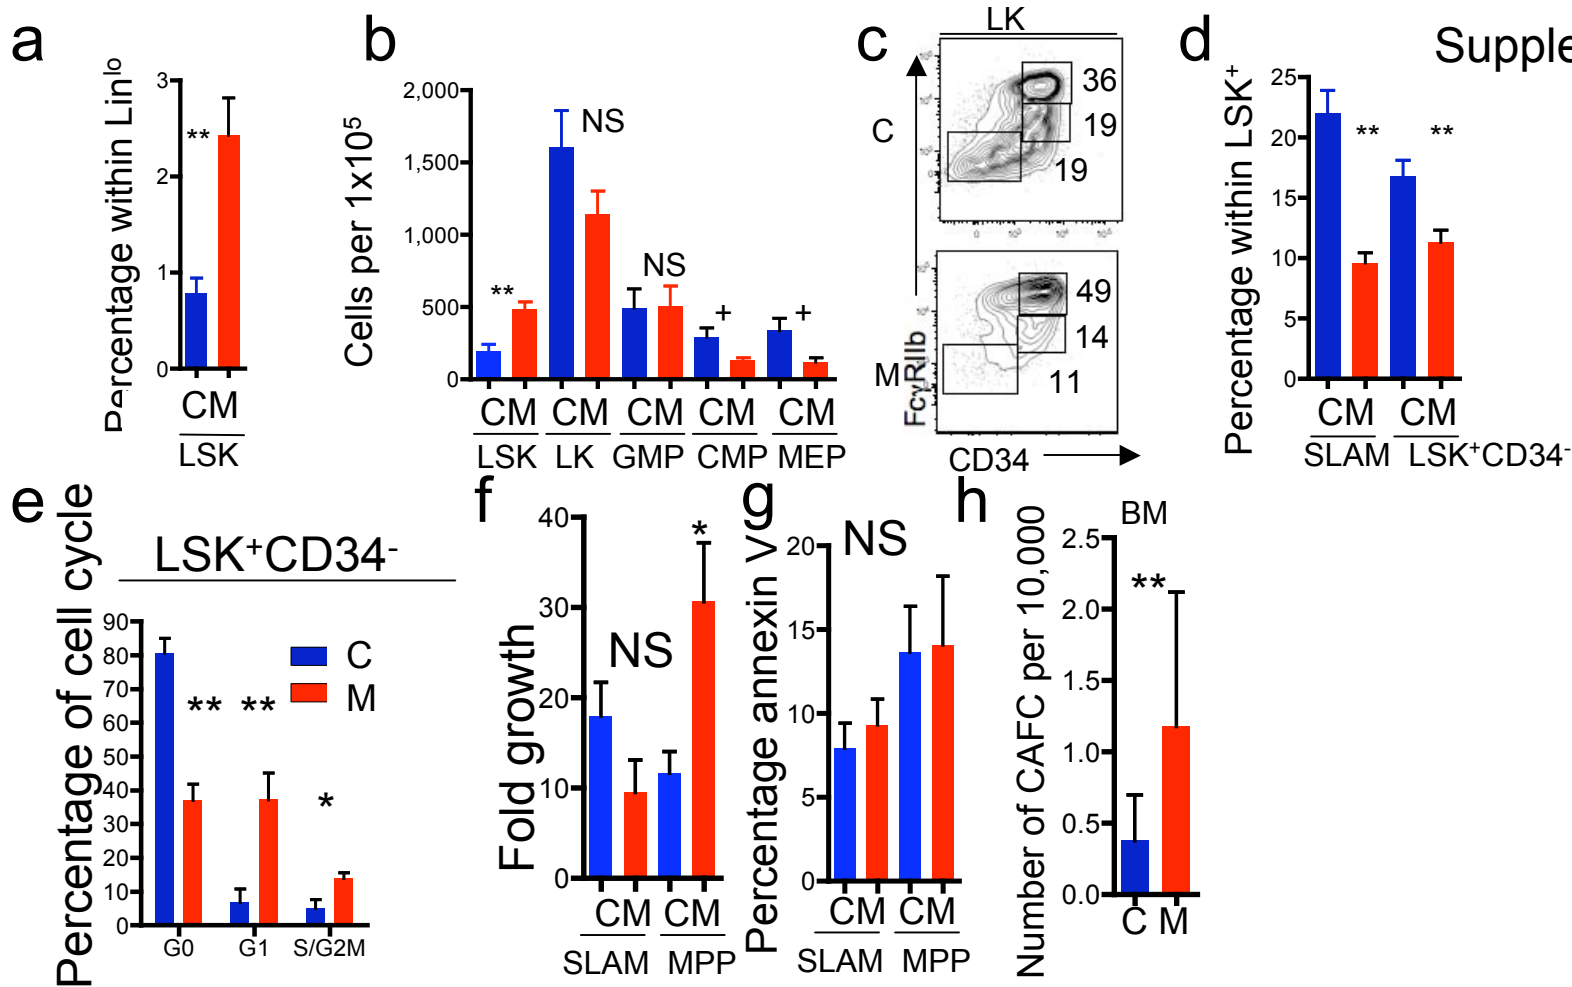

**Supplementary Figure 4: Changes in frequency and proliferation of MSI2-expressing bone marrow cells.** **a**, The percentage of LSK in the Lin<sup>low</sup> compartment of the bone marrow in control (C) and MSI2 induced (M) cells. **b**, Numbers of bone marrow cells of specific phenotype, as indicated. Hematopoietic stem and progenitors cells (LSK); committed progenitors (LK); granulocyte monocyte progenitor (GMP); common myeloid progenitor (CMP); megakaryocyte-erythroid progenitors (MEP). **c**, Representative flow plot stained and gated on PI<sup>-</sup>, Lineage<sup>Low</sup> Kit<sup>+</sup>, Sca<sup>-</sup> progenitors with average percentages indicated in the plots. **d**, Frequency of long-term stem cells (SLAM; LSK<sup>+</sup> CD150<sup>+</sup> CD48<sup>-</sup> or LSK<sup>+</sup>CD34<sup>-</sup>) within the LSK compartment of the bone marrow; fractionation defined in methods. **e**, Cell cycle analysis was performed with Hoechst and pyronin gated on long term stem cells as in **Fig. 2c** (LSK<sup>+</sup> CD34<sup>-</sup>) and representative data from at least 7 mice and error bars represent s.e.m. **f**, Two thousand SLAM and MPP (LSK, CD48<sup>-</sup>, CD150<sup>-</sup>) cells were plated and counted after 5 days of proliferation (fold growth over day 0, n=4 control and n=3 MSI2). **g**, Flow cytometric apoptosis analysis gated on Annexin V/PI<sup>-</sup> cells after 5 days of culture. **h**, Number of CAFC per 10,000 cells from whole bone-marrow plated for 2 weeks. Data are representative of two mice per genotype, NS= not significant, \*\*=p<0.001, \*=p<0.01 and +=p<0.05).

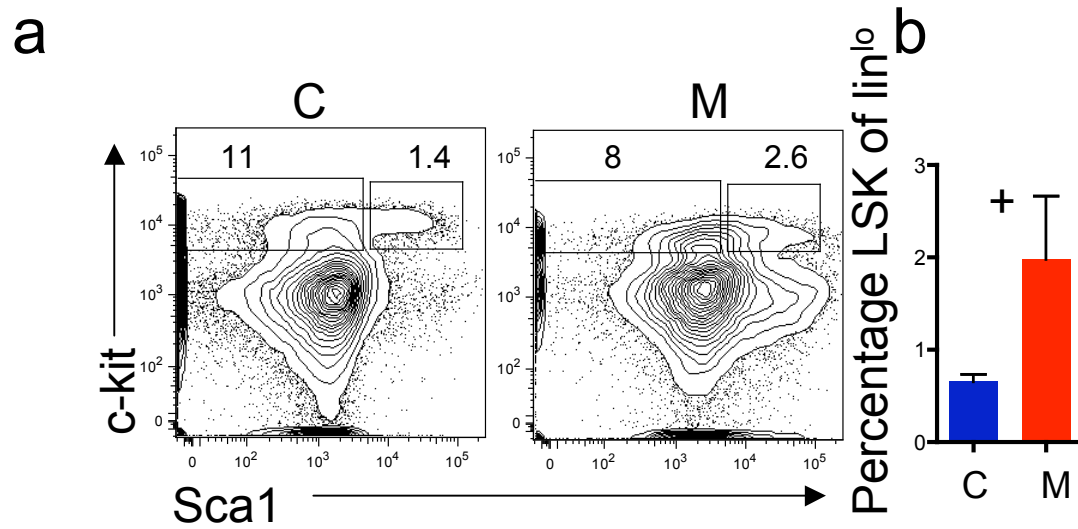

**Supplementary Figure 5: MSI2 induction in primary animals leads to an expansion of hematopoietic stem cells and progenitor cells *in vivo*.** **a**, Representative flow cytometry of primary rtTA control (C) and MSI2 induced bone marrow (M) five days after dox administration. **b**, Quantification of flow cytometry in panel **a**, data plotted as the percentage of LSK cells in the lineage<sup>low</sup> fraction of the bone marrow (C=rtTA, M=MSI2. Representative of 3 independent experiments with at least 3 mice per condition, +: p<0.05)

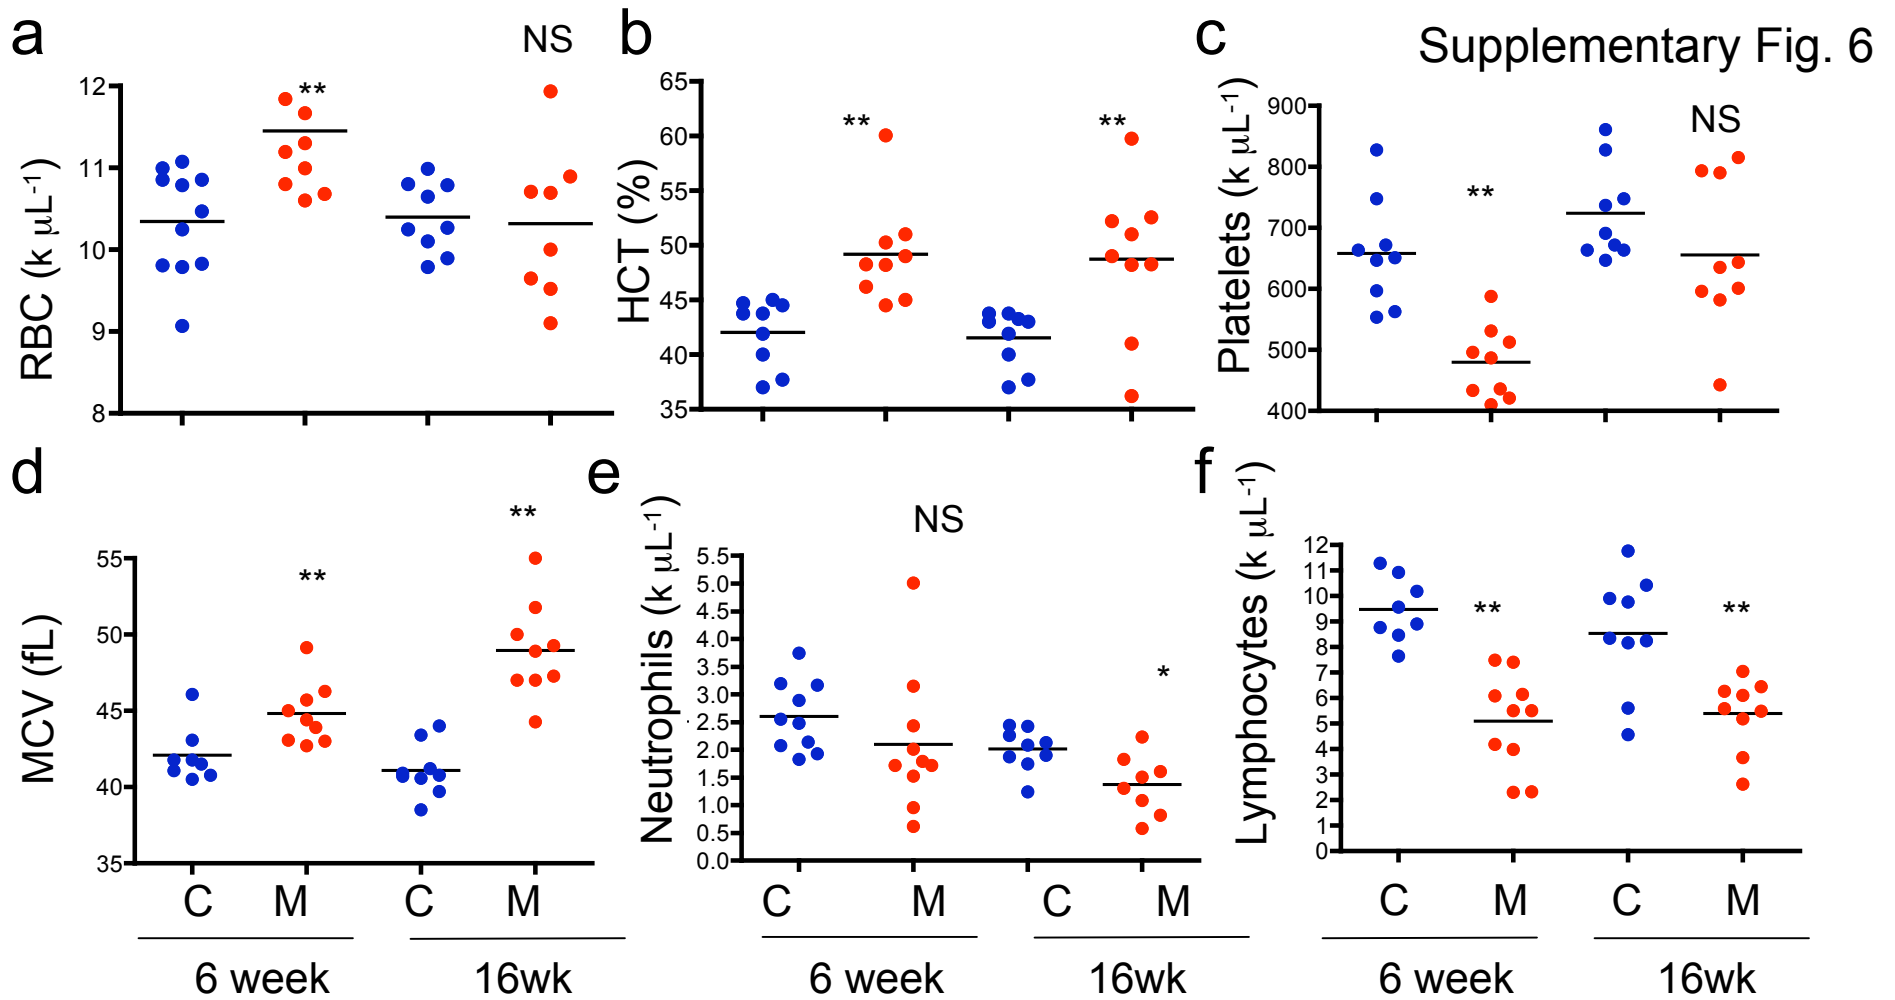

**Supplementary Figure 6: Decreases in multiple hematopoietic populations of mice ectopically expressing MSI2 after long-term engraftment.** **a-f**, Complete blood counts from non-competitive transplanted MSI2 inducible (M) and rtTA control (C) animals 6 and 16 weeks after dox administration. **a**, Red blood cells, **b**, Hematocrit, **c**, Platelets, **d**, Mean corpuscular volume, **e**, Neutrophils, and **f**, Lymphocytes, NS= not significant, \*\*= $p < 0.001$ , \*= $p < 0.01$  and + = $p < 0.05$ .

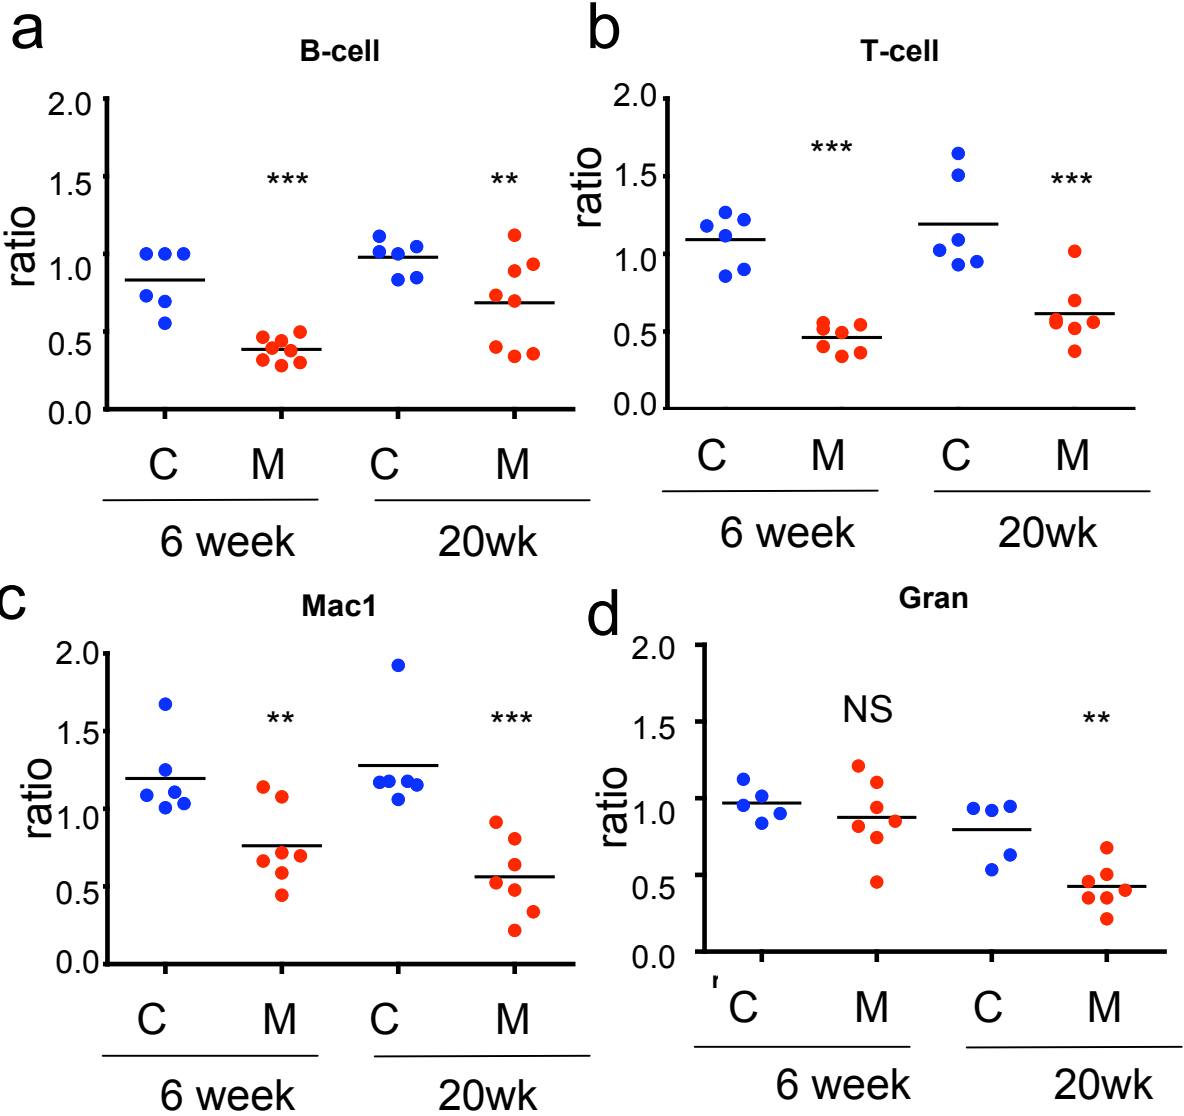

**Supplementary Figure 7: Ectopic MSI2 expression decreases myeloid and lymphoid lineages in competitive long-term transplants.**  
**a–d**, Individual contribution from the peripheral blood of competitive MSI2 inducible transplants (each dot represents an individual mouse, blue=rtTA; C, red=MSI2; M). Individual mice were allowed to engraft for 6 weeks and all the analysis was normalized to the initial, pre-dox treatment, then monitored at 6 and 29 weeks of dox treatment. Chimerism of peripheral blood B-cells (B220<sup>+</sup>) T-cells (CD3 or CD4/CD8), Granulocytes (Mac1<sup>+</sup>/Gr1<sup>+</sup>), and macrophages (Mac1<sup>+</sup> Gr1<sup>-</sup>), measured by flow cytometry NS= not significant, \*\*\*=p<0.001, \*\*=p<0.01, \*=p<0.05.

Supplementary Fig. 8

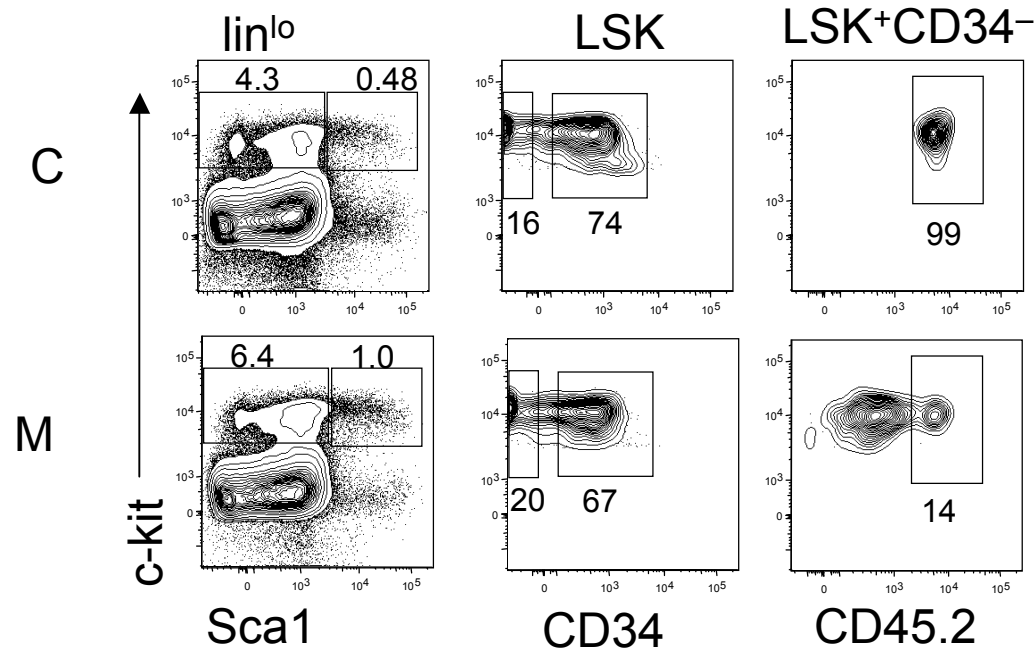

**Supplementary Figure 8: Decreased long-term engraftment of CD34<sup>-</sup> LSKs with ectopic MSI2 expression.** Mice were competitively transplanted with a 3:1 ratio of MSI2- or rtTA-expressing (CD45.2):wildtype cells (CD45.1), allowed to engraft, then administered dox for 20 weeks. Bone marrow was then analyzed by flow cytometry and live, PI<sup>-</sup> cells were gated and stained with indicated markers. (Representative flow cytometric plot for **Fig. 2i**).

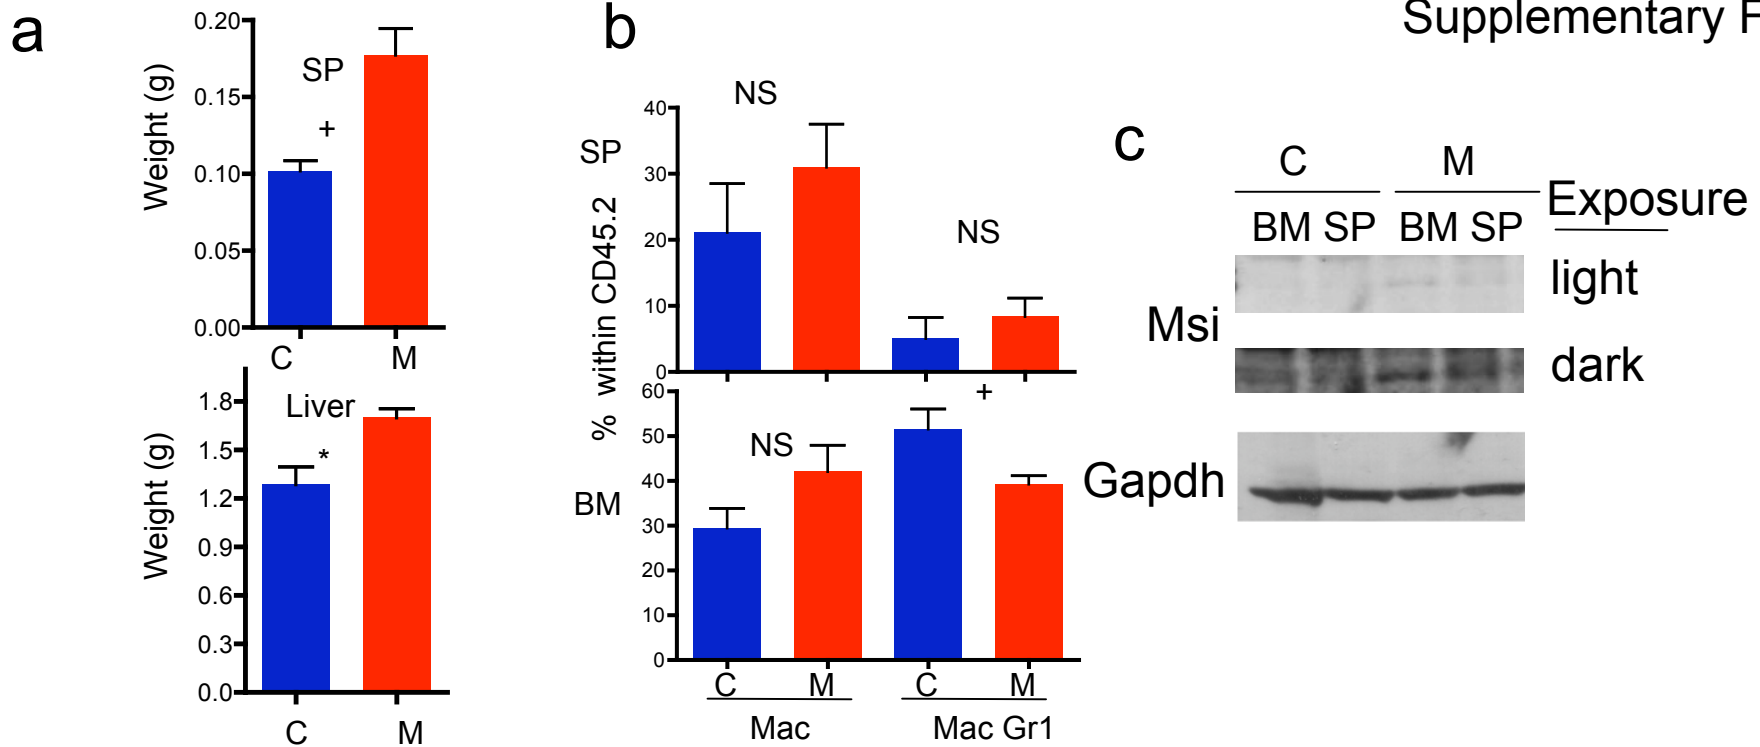

**Supplementary Figure 9: Selection against MSI2 induction in long-term dox treated transplant recipients. a,** Spleen and liver weights from at least 5 mice ( $\pm$   $p < 0.02$ ,  $*$  =  $p < 0.01$ ). **b,** Flow cytometric analysis with myeloid markers gated on CD45.2 congenic marker as in **Supplementary Fig. 3.** with indicated tissues and gating from at least 4 mice. **c,** Immunoblotting for MSI2 in the bone marrow of mice treated with doxycycline for 1 year after engraftment, NS= not significant,  $**$  =  $p < 0.001$ ,  $*$  =  $p < 0.01$  and  $+$  =  $p < 0.05$ .

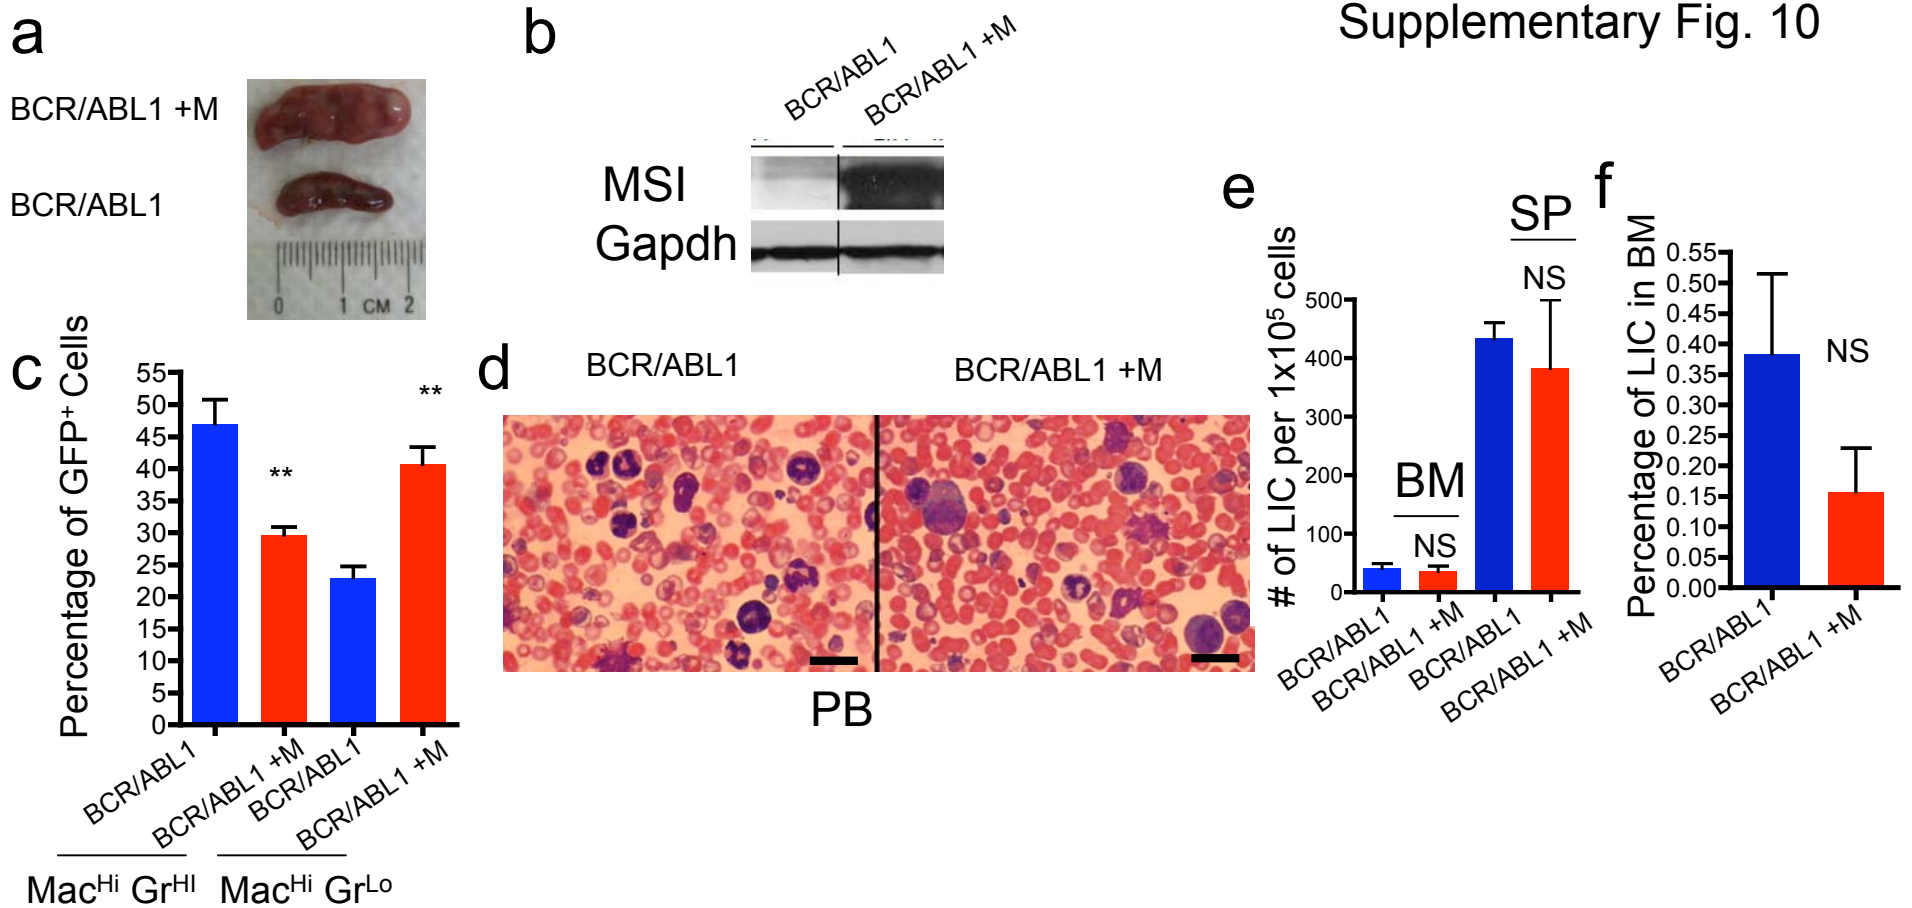

**Supplementary Figure 10: Skewing towards a more immature myeloid BCR-ABL1 leukemia in MSI2 induced mice.** **a**, Images of representative spleens from mice sacrificed at 14 days post transplantation of BCR-ABL1 with or without MSI2 (M). **b**, Immunoblot with indicated antibodies from control or MSI2 induced spleens from BCR/ABL1 diseased mice. **c**, Quantitation of GFP<sup>+</sup> cells of Mac<sup>hi</sup> Gr<sup>hi</sup> and Mac<sup>hi</sup> Gr<sup>lo</sup> from spleens of diseased mice. **d**, Representative peripheral blood smears of leukemic mice, black lines indicate scale 250  $\mu$ m. **e-f**, Flow cytometric analysis of spleen (**e**) and bone marrow (**e, f**) from diseased mice were gated on leukemia initiating cells (PI, lineage<sup>low</sup>, GFP<sup>+</sup> LSK in indicated tissues). Experiment from two independent experiments from at least 4 mice per condition, NS= not significant, \*\*=p<0.001, \*=p<0.01 and +=p<0.05.

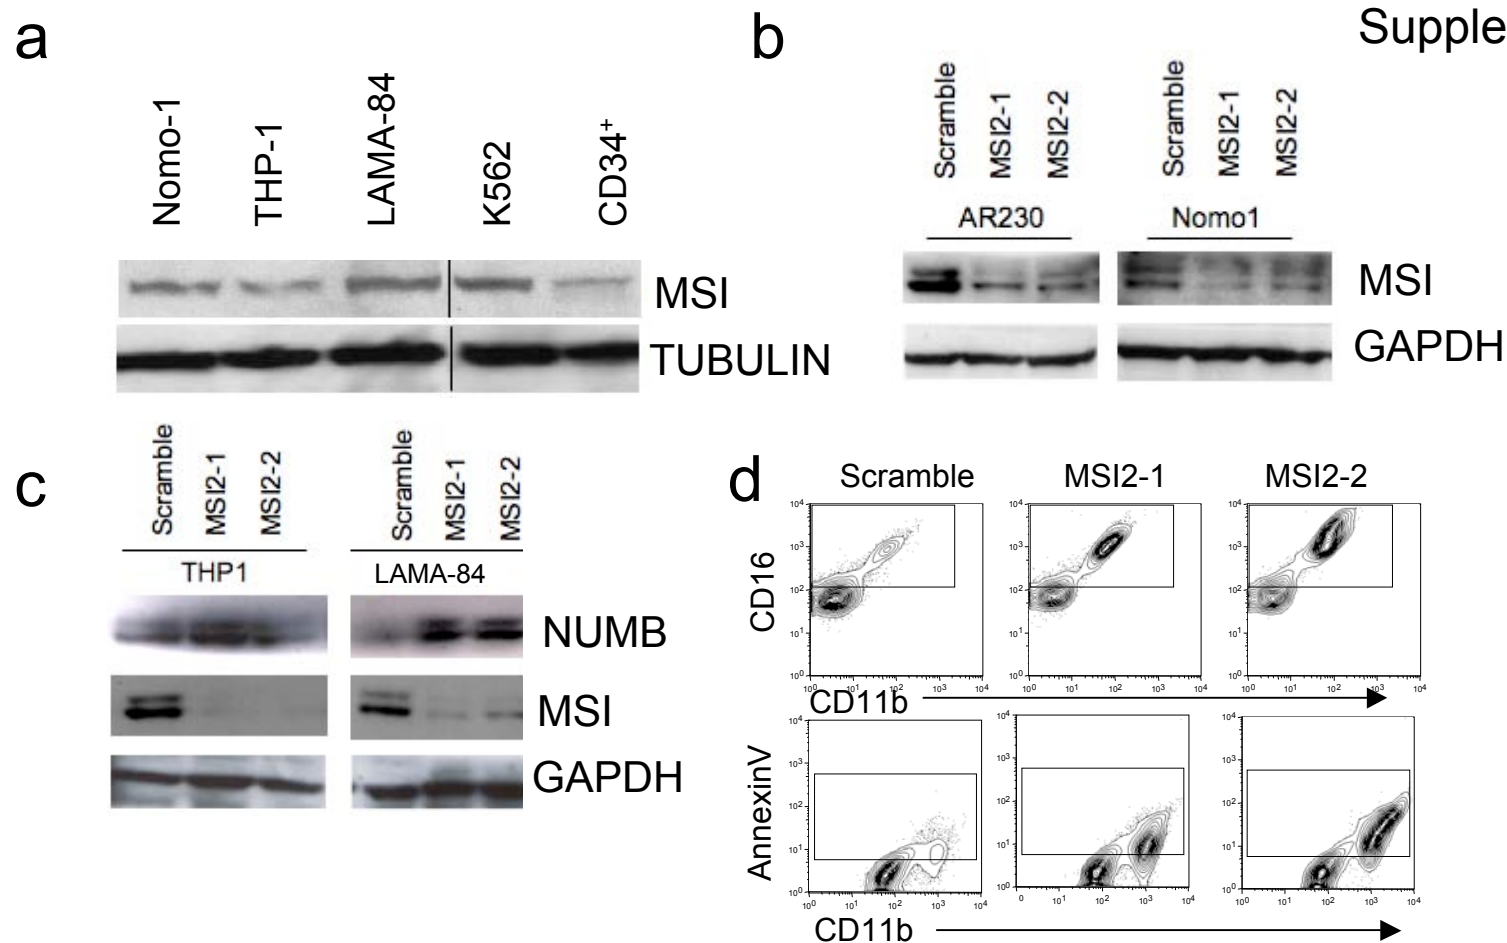

**Supplementary Figure 11: Knockdown of *MSI2* expression using shRNAs in myeloid leukemic cell lines and increased NUMB expression.** **a**, Immunoblot of AML cell lines (Nomo-1, THP-1) and CML-BC cell lines (LAMA-84, K562) and human CD34<sup>+</sup> cord blood cells, probed with indicated antibodies. **b–c**, Indicated cell lines were infected with viruses harboring control (scramble) or two individual *MSI2* shRNAs along with a constitutively expressed puromycin resistance cassette, and analyzed for *MSI2* and GAPDH protein levels (b) or NUMB, *MSI2*, and GAPDH protein levels (c) 3 days post puromycin selection. **d**, CD16 and CD11b surface antigen expression on LAMA-84 cells six days post-*MSI2* knockdown, indicating increased differentiation (representative flow plot from 3-4 independent experiments percentages presented in **Fig. 4d**, NS= not significant, \*\*= $p < 0.001$ , \*= $p < 0.01$  and + = $p < 0.05$ )



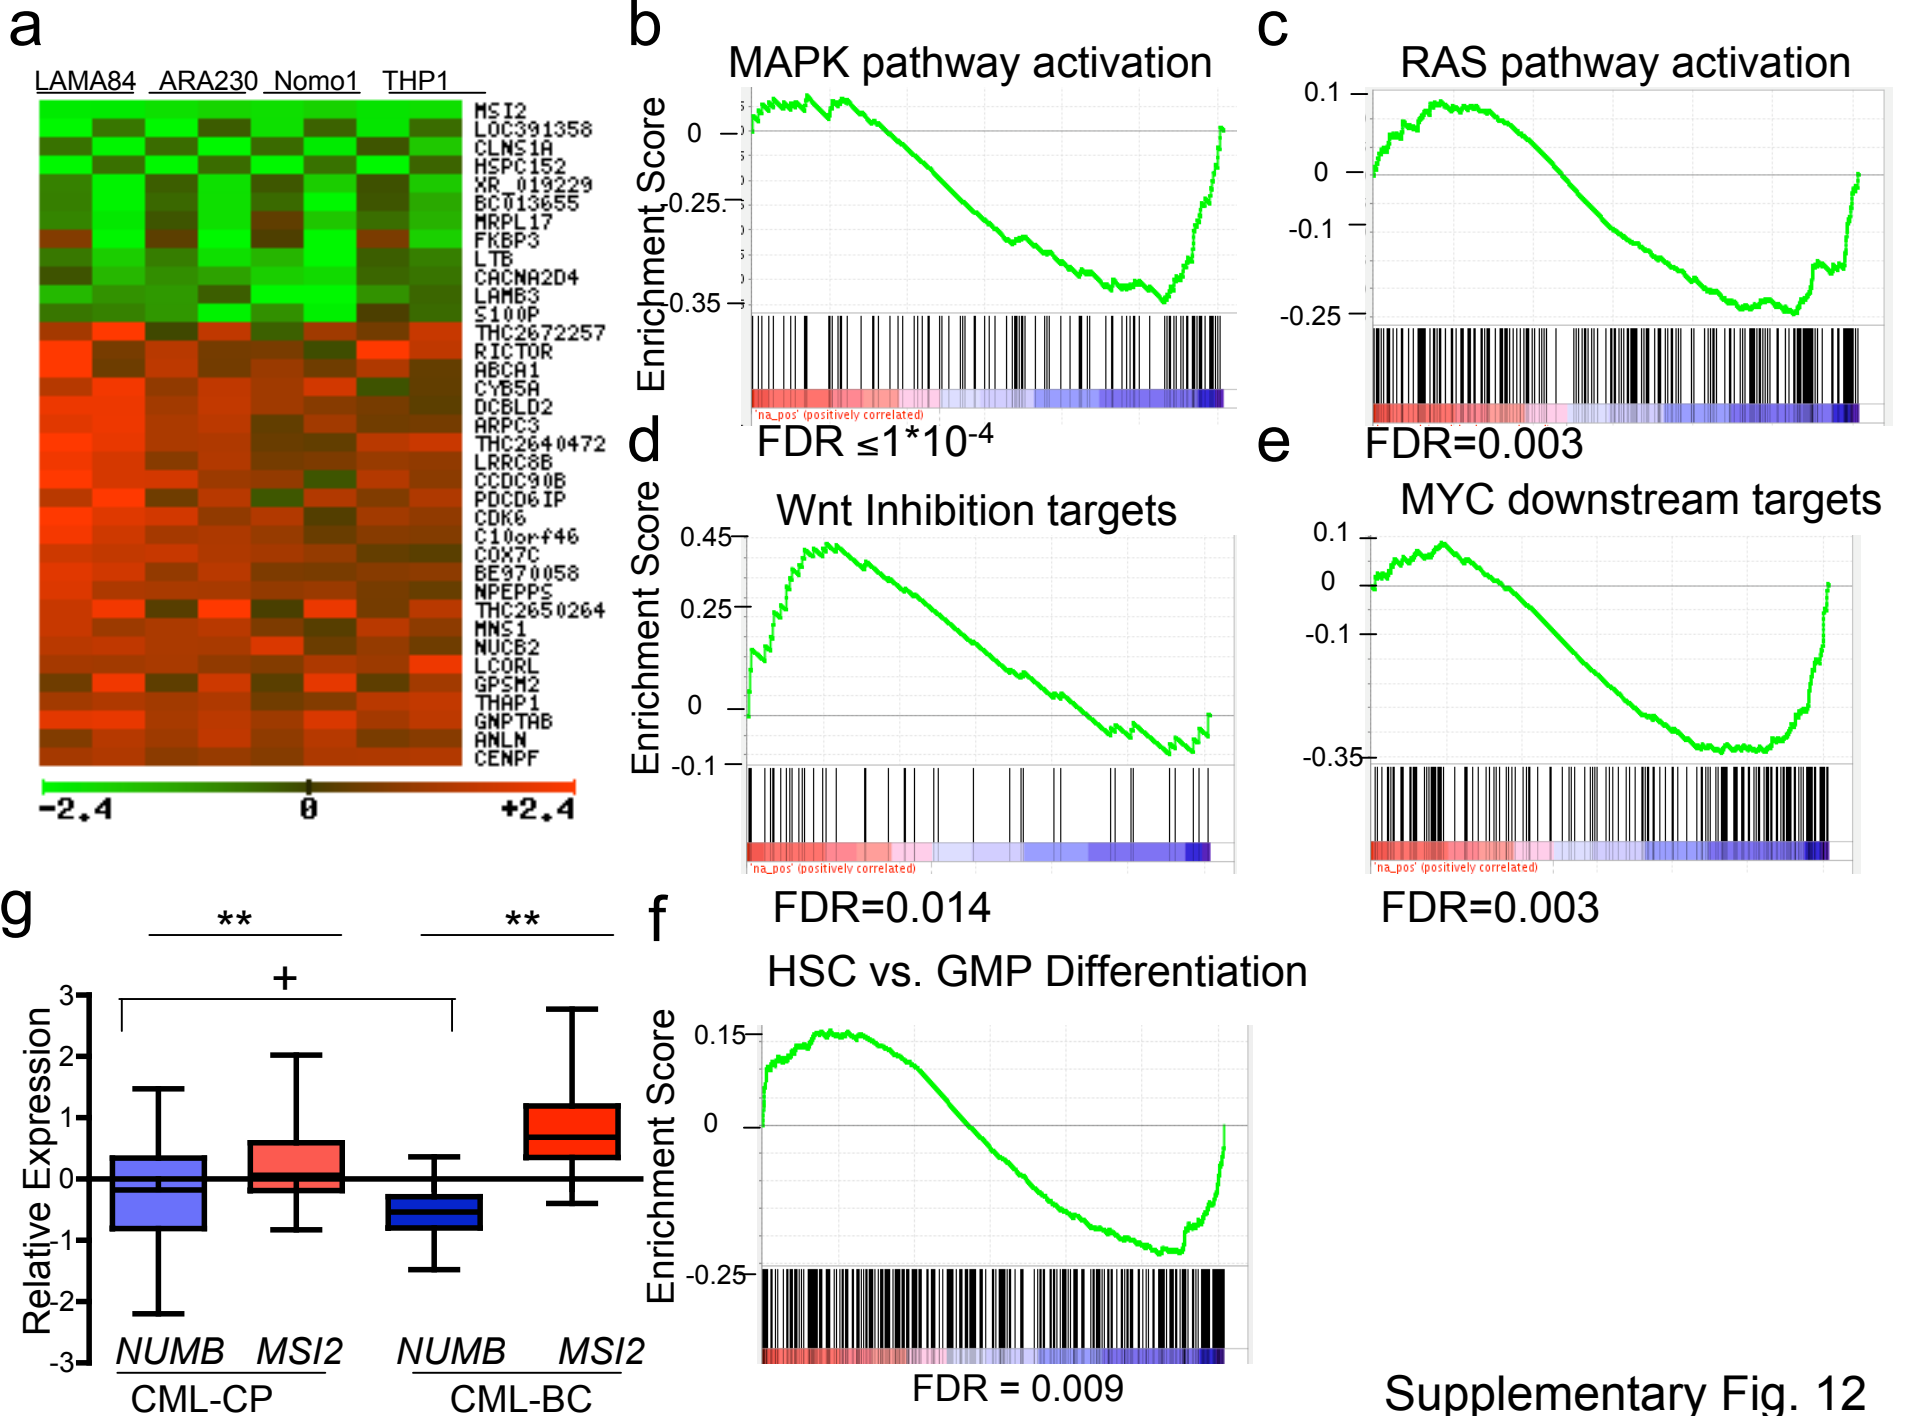

Supplementary Fig. 12

**Supplementary Figure 12: Effects of MSI2 knockdown on global gene expression in human myeloid leukemic cell lines.**

**a**, Heat map of differentially expressed genes from MSI2 shRNA infected myeloid leukemic cell lines compared to scramble controls (FDR < 0.05 and Fold change  $\geq$  2), **b–f**, Gene set enrichment analysis using *MSI2* shRNA microarray data identifies genes targets activated by the MAPK pathway being suppressed (b), genes targets activated by the RAS pathway being suppressed (c), WNT pathway inhibition (d), MYC target genes being suppressed (f), and genes enriched in HSCs versus GMPs being suppressed by *MSI2* knockdown. **g**, Comparison of NUMB and *MSI2* expression in chronic phase (CP) and blast crisis (BC) CML, NS= not significant, \*\*= $p < 0.001$ , \*= $p < 0.01$  and + = $p < 0.05$ .

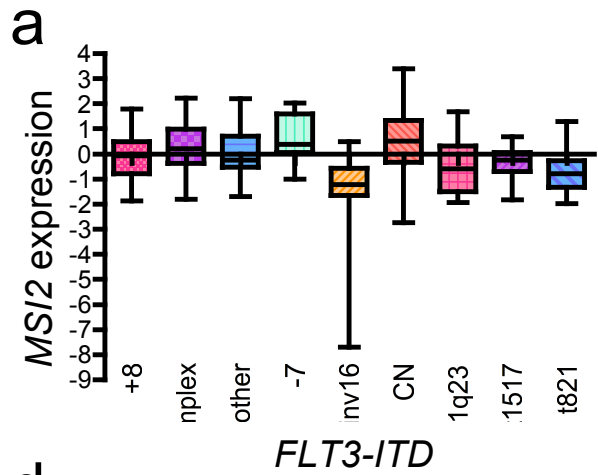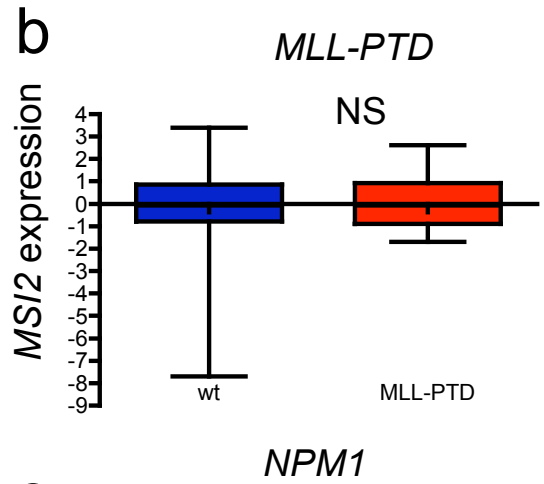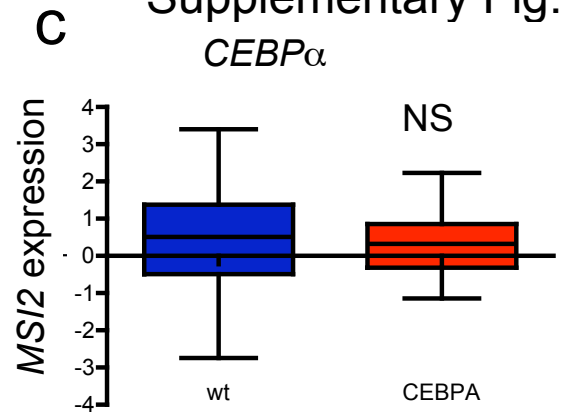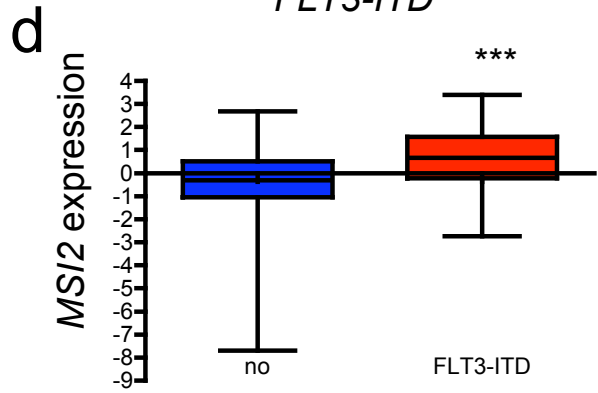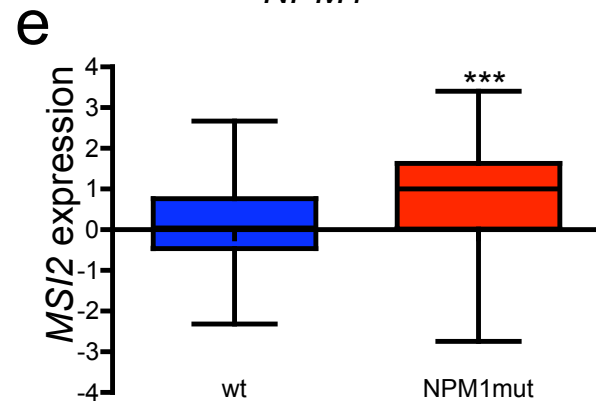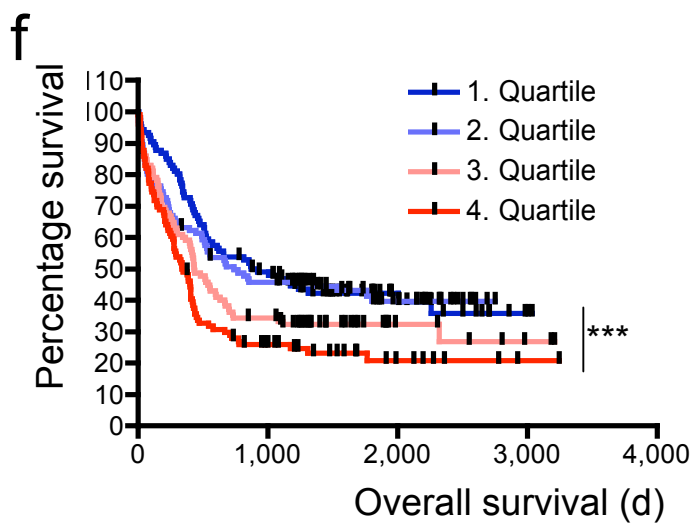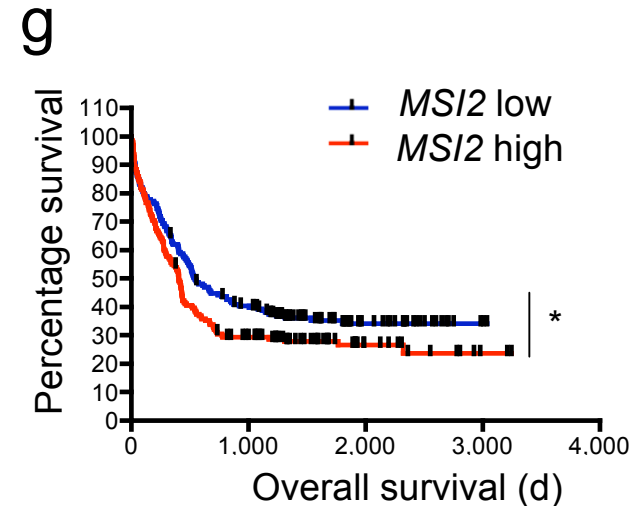

**Supplementary Figure 13: Increased *MSI2* expression is associated with a worse prognosis leukemia and association with cytogenetic parameters and molecular markers.** **a–e**, Levels of *MSI2* mRNA expression obtained from Bullinger AML patient microarray data are segregated by molecular and cytogenetic markers (Oneway ANOVA g, NS= not significant, \*\*\* $p < 0.0001$ , \*\*= $p < 0.001$ , \*= $p < 0.01$  and + = $p < 0.05$ ).. **f**, Overall survival in AML patients segregated into quartiles based on *MSI2* expression. **g**, Overall survival of AML patients censoring inv16 and segregated by high and low *MSI2* expression.

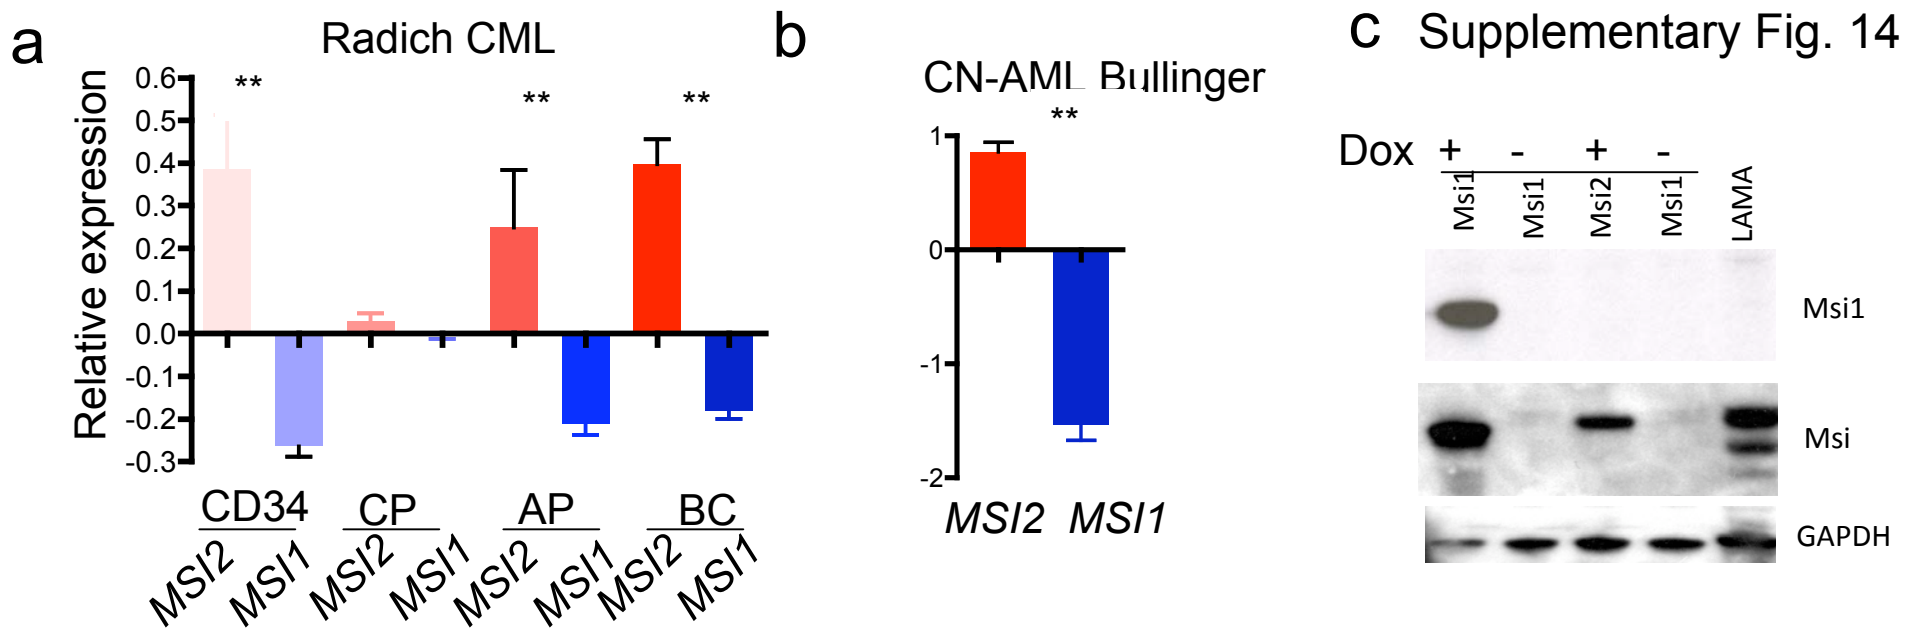

**Supplementary Figure 14: *MSII* is not expressed in myeloid leukemias.**

**a**, Analysis of Radich gene expression data comparing sorted human CD34<sup>+</sup> cells (n=7), chronic phase (CP, n=57), accelerated phase (AP, n=9), and myeloid blast crisis (BC, n=33) demonstrating significantly increased expression of *MSI2* (red) versus *MSI1* (blue) in CML blast crisis. **b**, Analysis of normal karyotype Bullinger dataset CN-AML comparing *MSI1* (blue) and *MSI2* (red) expression. **c**, Immunoblot of *MSI1*- inducible embryonic stem cells and *MSI2*-inducible embryonic stem cells induced with doxycycline where indicated for 24 hours. The *MSI1* antibody is not cross-reactive to *MSI2*, while the pan-*Msi* antibody (middle blot) detects both family members (representative of two independent experiments, NS= not significant, \*\*=p<0.001, \*=p<0.01 and +=p<0.05).

**a**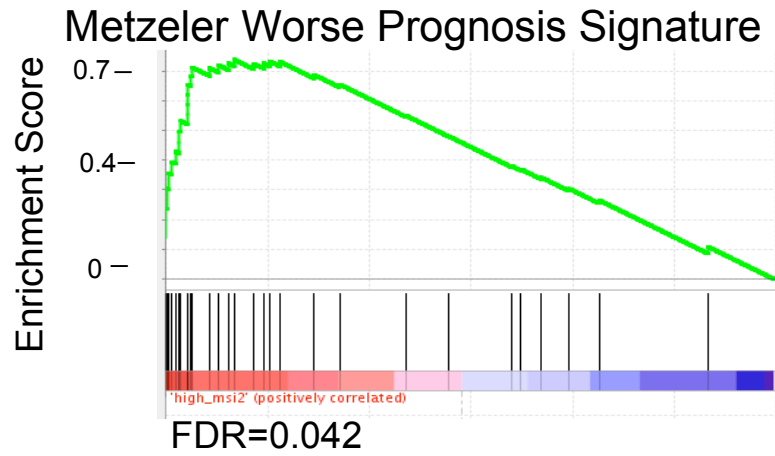**b**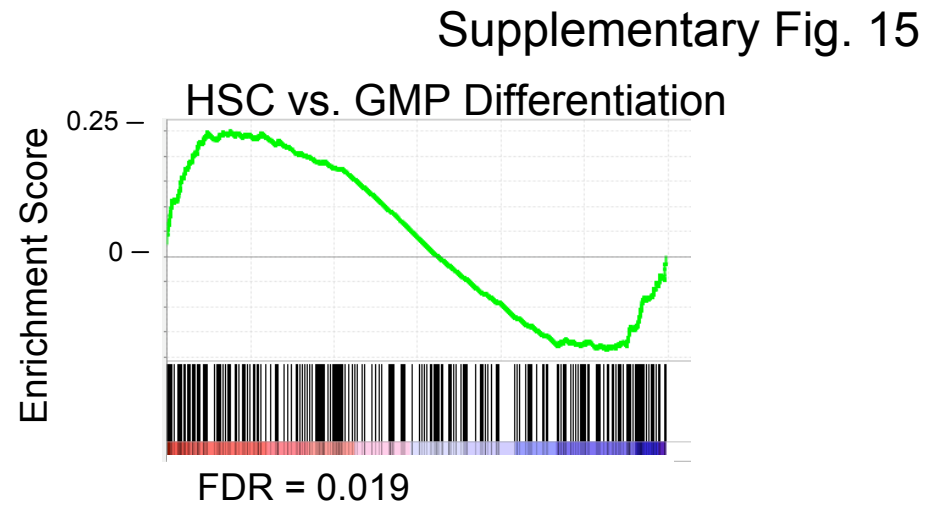

Supplementary Fig. 15

**Supplementary Figure 15: A worse prognosis and undifferentiated gene expression correlation in patients with high *MSI2* expression.** **a**, CN-AML poor clinical prognosis gene signature was correlated with 15 AML patients selected for the highest *MSI2* expression of normal karyotype and 15 patients with the lowest *MSI2* expression (CN-AML High and Low *MSI2*). **b**, CN-AML High *MSI2* expression dataset positively correlates to the HSC versus GMP gene signature.

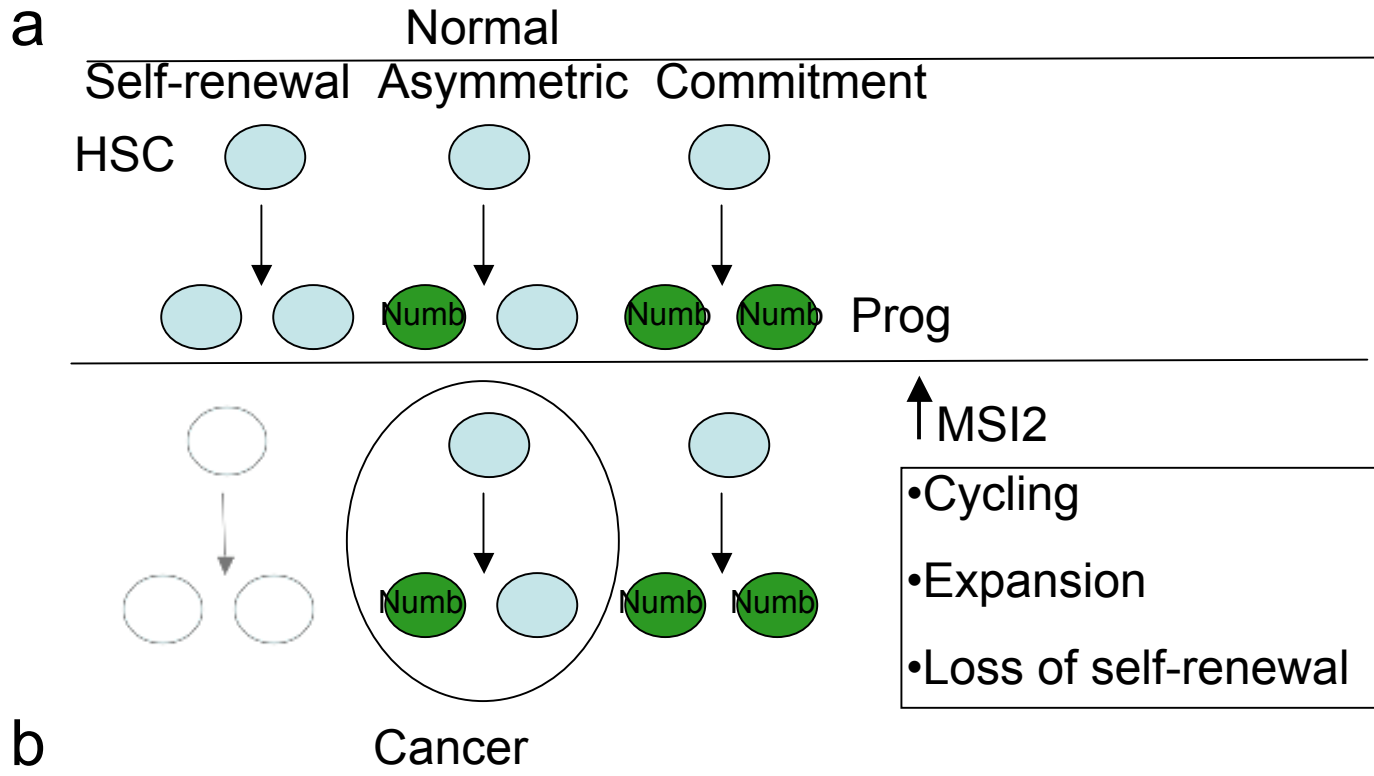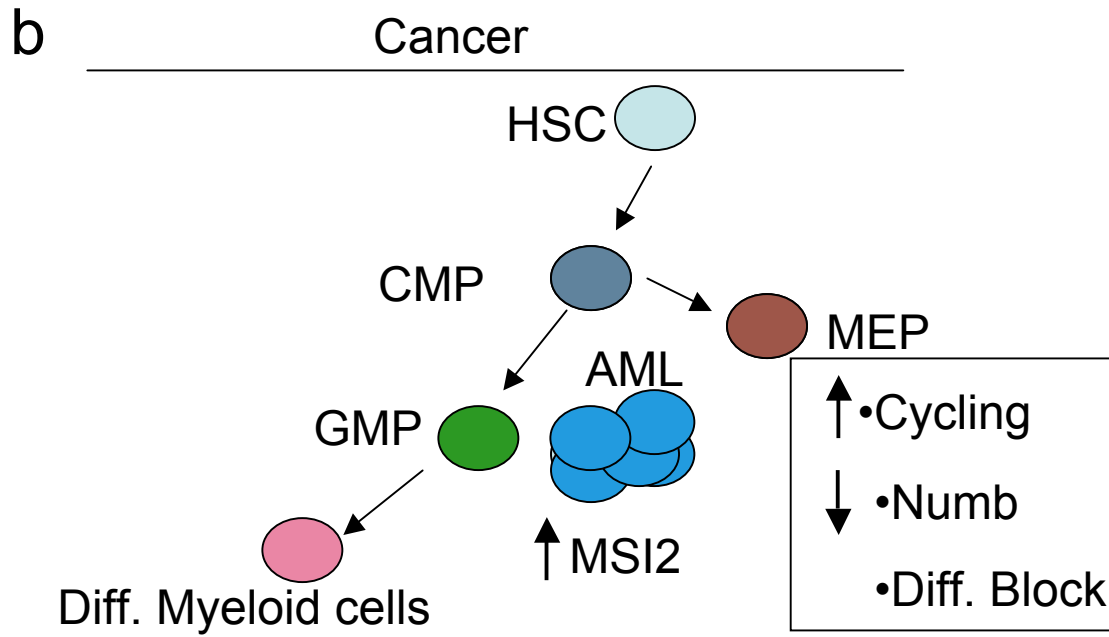

**Supplementary Figure 16: MSI2 expression promotes proliferation and asymmetric division in normal HSCs and blocks differentiation in AML. a,** Normal HSC cell fate decisions with MSI2 expression increasing Numb asymmetric segregation (large circle) and driving proliferation leading to a decrease in self renewal. **b,** In myeloid leukemic cells higher MSI2 expression maintains proliferation and a block in differentiation.

Table 1

| <b>MSI2 shRNA</b>                        |      |       |         |                      |                      |
|------------------------------------------|------|-------|---------|----------------------|----------------------|
| NAME GENE SET                            | SIZE | NES   | FDR     | Upregulated in class | REFERENCE            |
| <b>ONCOGENIC SIGNATURES</b>              |      |       |         |                      |                      |
| MAPK_UP_CREIGHTON                        | 109  | -1.71 | <0.0001 | MSI2shrna DN         | Creighton et al 2008 |
| MYC_UP_COLLER                            | 239  | -1.36 | 0.033   | MSI2shrna DN         | Coller et al 2000    |
| CYCLIND1_UP_LAMB                         | 190  | -1.15 | 0.190   | MSI2shrna DN         | Lamb et al 2003      |
| MYC_BILD                                 | 180  | -1.84 | 0.003   | MSI2shrna DN         | Bild et al 2006      |
| RAS_BILD                                 | 231  | -1.36 | 0.047   | MSI2shrna DN         | Bild et al 2006      |
| <b>PROGNOSIS SIGNATURE</b>               |      |       |         |                      |                      |
| METZELER_SURVIVALSIGNATURE_POSITIVESCORE | 39   | -1.66 | 0.046   | MSI2shrna DN         | Metzeler et al 2008  |
| <b>DIFFERENTIATION</b>                   |      |       |         |                      |                      |
| HSCVSGMP_UP                              | 344  | -1.39 | 0.009   | MSI2shrna DN         | Krivtsov et al 2006  |
| <b>WNT</b>                               |      |       |         |                      |                      |
| GUO_UP_WNT_INHIBITION                    | 43   | 1.77  | 0.014   | MSI2shrna UP         | Guo et al. 2008      |
| GUO_DN_WNT_INHIBITION                    | 43   | -1.62 | 0.077   | MSI2shrna DN         | Guo et al. 2008      |

| <b>CN-AML High and Low MSI2</b>          |      |       |         |                      |                     |
|------------------------------------------|------|-------|---------|----------------------|---------------------|
| NAME GENE SET                            | SIZE | NES   | FDR     | Upregulated in class | REFERENCE           |
| <b>DIFFERENTIATION</b>                   |      |       |         |                      |                     |
| HSCVSGMP_UP                              | 298  | 1.32  | 0.019   | high_msi2            | Krivtsov et al 2006 |
| HSCVSGMP_DN                              | 171  | -2.59 | <0.0001 | low_msi2             | Krivtsov et al 2006 |
| <b>PROGNOSIS SIGNATURE</b>               |      |       |         |                      |                     |
| METZELER_SURVIVALSIGNATURE_POSITIVESCORE | 33   | 2.03  | <0.0001 | high_msi2            | Metzeler et al 2008 |
| GOOD_PROGNOSIS_AML_YAGI                  | 28   | -1.83 | 0.017   | low_msi2             | Yagi et al          |

| <b>LSK MSI2 overexpression</b> |      |       |         |                      |                      |
|--------------------------------|------|-------|---------|----------------------|----------------------|
| NAME GENE SET                  | SIZE | NES   | FDR     | Upregulated in class | REFERENCE            |
| <b>ONCOGENIC SIGNATURES</b>    |      |       |         |                      |                      |
| MAPK_UP_CREIGHTON              | 95   | -1.74 | <0.0001 | MSI2 overexpression  | Creighton et al 2008 |
| MYC_UP_COLLER                  | 213  | -1.44 | 0.01    | MSI2 overexpression  | Coller et al 2000    |
| CYCLIND1_UP_LAMB               | 185  | -1.49 | 0.01    | MSI2 overexpression  | Lamb et al 2003      |
| RAF1_UP_CREIGHTON              | 489  | -1.37 | 0.01    | MSI2 overexpression  | Creighton et al 2008 |
| RAS_BILD                       | 200  | -2.04 | <0.0001 | MSI2 overexpression  | Bild et al 2006      |

**Supplementary Table 1: Gene set enrichment analysis summary.**  
GSEAs from indicated microarray datasets.



**Table 2** Multivariate Cox Regression analysis of OS and EFS in AML (Bullinger dataset)

| Variable          | Overall Survival<br>(n =205) |           |     | Event-free Survival<br>(n =205) |           |     |
|-------------------|------------------------------|-----------|-----|---------------------------------|-----------|-----|
|                   | HR (95% CI)                  | P         |     | HR (95% CI)                     | P         |     |
| Age               | 1.04 (1.02-1.05)             | 4.70E-007 | *** | 1.02 (1.01-1.04)                | 5.00E-004 | *** |
| FAB               | 1.02 (0.92-1.14)             | 6.95E-001 |     | 0.96 (0.87-1.07)                | 5.53E-001 |     |
| Cytogenetic group | 0.98 (0.92-1.05)             | 5.90E-001 |     | 0.98 (0.92-1.05)                | 4.85E-001 |     |
| NPM1+/FLT3-       | 0.49 (0.31-0.79)             | 3.20E-003 | **  | 0.36 (0.23-0.58)                | 1.90E-005 | *** |
| MSI2              | 1.22 (1.05-1.42)             | 9.40E-003 | **  | 1.11 (0.96-1.28)                | 1.71E-001 |     |

**Table 3** Multivariate Cox Regression analysis of OS and EFS in AML (Bullinger dataset)

| Variable          | Overall Survival<br>(n =378) |           |     | Event-free Survival<br>(n =376) |           |     |
|-------------------|------------------------------|-----------|-----|---------------------------------|-----------|-----|
|                   | HR (95% CI)                  | P         |     | HR (95% CI)                     | P         |     |
| Age               | 1.03 (1.02-1.04)             | 2.90E-010 | *** | 1.02 (1.01-1.03)                | 1.60E-006 | *** |
| FAB               | 0.97 (0.89-1.06)             | 5.17E-001 |     | 0.92 (0.84-1.00)                | 4.60E-002 | *   |
| Cytogenetic group | 0.91 (0.88-0.96)             | 1.60E-004 | *** | 0.92 (0.88-0.96)                | 3.30E-005 | *** |
| FLT3_ITD          | 1.90 (1.41-2.56)             | 2.20E-005 | *** | 1.55 (1.16-2.06)                | 2.90E-003 | **  |
| MSI2              | 1.13 (1.00-1.27)             | 4.81E-002 | *   | 1.14 (1.02-1.28)                | 1.99E-002 | *   |

**Table 4** Multivariate Cox Regression analysis of OS and EFS in Normal Karyotype AML (Metzeler dataset)

| Variable | Overall Survival<br>(n =162) |           |     |
|----------|------------------------------|-----------|-----|
|          | HR (95% CI)                  | P         |     |
| Age      | 1.03 (1.01-1.04)             | 8.90E-004 | *** |
| FAB      | 0.94 (0.81-1.08)             | 3.51E-001 |     |
| MSI2     | 1.41 (1.09-1.81)             | 7.73E-003 | **  |

**Supplementary Table 2–4: *MSI2* is an independent prognostic marker in AML.** **Table. 2,** *MSI2* expression was found to be significantly associated of a shorter overall survival with a hazard ratio of 0.122 (95% confidence interval 1.05 to 1.42  $p=9.4e-03$ ) considering age, FAB classification, FLT3-ITD and NPM1 mutational status (used as a binary variable), cytogenetic group and *MSI2* expression as a continuous variable. Age and NPM1+/FLT3 ITD- status were found to be significant independent prognostic factors of overall and event free survival. **Table. 3,** Cytogenetic group was also found significant ( $p=2.2e-07$ ) considering the same covariates except NPM1 status. **Table. 4,** Validation cohort of AML samples with normal karyotype showed a significant result for *MSI2* expression as a prognostic marker of worse prognosis (HR=1.41, 95 % CI =1.09-1.81 and  $p=7.73e-03$ ) including age and FAB classification as variables in association with overall survival, NS= not significant, \*\*\*= $p<0.0001$ , \*\*= $p<0.001$ , \*= $p<0.01$  and + = $p<0.05$ .

Supplementary Table 5: MSI2 shRNA signature from AML cell line.  
List of the 480 probes used for unsupervised clustering in Fig. 4h.

| ProbeName    | GeneName   | SystematicName | Description                                                                                                      | logFC | AveExpr | t    | P.Value  | adj.P.Val |
|--------------|------------|----------------|------------------------------------------------------------------------------------------------------------------|-------|---------|------|----------|-----------|
| A_24_P281975 | GNPTAB     | NM_024312      | ref Homo sapiens N-acetylglucosamine-1-phosphate transferase, alpha and beta subunits (GNPTAB), mRNA [NM_024312] | 1.38  | 11.07   | 9.43 | 4.34E-06 | 0.01      |
| A_32_P140153 | THC2650264 | THC2650264     | tr Q8CHC2 Q8CHC2 SE (Q8CHC2) MKIAA0940 protein (Fragment), partial (57%) [THC2650264]                            | 1.37  | 5.07    | 7.08 | 4.70E-05 | 0.02      |
| A_24_P925191 | THC2640472 | THC2640472     | tr Q2M1U4 Q2M1U4 AN (Q2M1U4) Catalase, partial (31%) [THC2640472]                                                | 1.35  | 8.13    | 5.53 | 0        | 0.03      |
| A_24_P166663 | CDK6       | NM_001259      | ref Homo sapiens cyclin-dependent kinase 6 (CDK6), mRNA [NM_001259]                                              | 1.34  | 13.4    | 6.08 | 0        | 0.02      |
| A_23_P162127 | CCDC90B    | NM_021825      | ref Homo sapiens coiled-coil domain containing 90B (CCDC90B), mRNA [NM_021825]                                   | 1.32  | 11.77   | 5.64 | 0        | 0.03      |
| A_23_P204380 | GNPTAB     | NM_024312      | ref Homo sapiens N-acetylglucosamine-1-phosphate transferase, alpha and beta subunits (GNPTAB), mRNA [NM_024312] | 1.3   | 8.75    | 8.74 | 8.29E-06 | 0.01      |
| A_32_P193322 | RICTOR     | NM_152756      | ref Homo sapiens rapamycin-insensitive companion of mTOR (RICTOR), mRNA                                          | 1.2   | 10.02   | 4.96 | 0        | 0.04      |
| A_24_P137434 | DCBLD2     | NM_080927      | ref Homo sapiens discoidin, CUB and LCCL domain containing 2 (DCBLD2), mRNA [NM_080927]                          | 1.17  | 9.86    | 5.35 | 0        | 0.03      |
| A_32_P169679 | LCORL      | AL133031       | gb Homo sapiens mRNA; cDNA DKFZp434K087 (from clone DKFZp434K087). [AL133031]                                    | 1.16  | 6.38    | 8.76 | 8.16E-06 | 0.01      |
| A_24_P167473 | ARPC3      | NM_005719      | ref Homo sapiens actin related protein 2/3 complex, subunit 3, 21kDa (ARPC3), mRNA [NM_005719]                   | 1.14  | 15.89   | 5.47 | 0        | 0.03      |
| A_23_P72643  | ADAM9      | NM_003816      | ref Homo sapiens ADAM metalloproteinase domain 9 (meltrin gamma) (ADAM9), transcript variant 1, mRNA [NM_003816] | 1.13  | 9.89    | 4.65 | 0        | 0.05      |
| A_24_P882914 | C10orf46   | NM_153810      | ref Homo sapiens chromosome 10 open reading frame 46 (C10orf46), mRNA [NM_153810]                                | 1.13  | 8.97    | 6.1  | 0        | 0.02      |

|              |            |                |                                                                                                                                                       |      |       |       |          |      |
|--------------|------------|----------------|-------------------------------------------------------------------------------------------------------------------------------------------------------|------|-------|-------|----------|------|
| A_24_P945194 | PDCD6IP    | NM_013374      | ref Homo sapiens programmed cell death 6 interacting protein (PDCD6IP), mRNA [NM_013374]                                                              | 1.11 | 9.26  | 5.65  | 0        | 0.03 |
| A_24_P595460 | NUCB2      | AK097398       | gb Homo sapiens cDNA FLJ40079 fis, clone TEST12001498, highly similar to DNA-BINDING PROTEIN NEFA PRECURSOR. [AK097398]                               | 1.11 | 9.75  | 7.62  | 2.59E-05 | 0.01 |
| A_23_P101208 | CYB5A      | NM_001914      | ref Homo sapiens cytochrome b5 type A (microsomal) (CYB5A), transcript variant 2, mRNA [NM_001914]                                                    | 1.11 | 12.53 | 5.15  | 0        | 0.04 |
| A_24_P235429 | ABCA1      | NM_005502      | ref Homo sapiens ATP-binding cassette, sub-family A (ABC1), member 1 (ABCA1), mRNA [NM_005502]                                                        | 1.09 | 9.53  | 4.98  | 0        | 0.04 |
| A_24_P345131 | LRRC8B     | ENST0000030947 | ens Leucine-rich repeat-containing protein 8B (T-cell activation leucine repeat-rich protein). [Source:Uniprot/SwissProt;Acc:Q6P9F7] [ENST0000030947] | 1.09 | 8.04  | 5.55  | 0        | 0.03 |
| A_23_P134814 | THAP1      | NM_018105      | THAP domain containing, apoptosis associated protein 1 (THAP1), transcript variant 1, mRNA [NM_018105]                                                | 1.09 | 11.22 | 9.33  | 4.74E-06 | 0.01 |
| A_23_P110811 | COX7C      | NM_001867      | cytochrome c oxidase subunit VIIc (COX7C), nuclear gene encoding mitochondrial protein, mRNA [NM_001867]                                              | 1.08 | 15.96 | 6.13  | 0        | 0.02 |
| A_32_P131797 | BE970058   | BE970058       | gb BE970058 601680172F1 NIH_MGC_78 Homo sapiens cDNA clone IMAGE:3950464 5', mRNA sequence [BE970058]                                                 | 1.08 | 9.56  | 6.39  | 0        | 0.02 |
| A_32_P218671 | THC2672257 | THC2672257     | Unknown                                                                                                                                               | 1.07 | 7.25  | 4.73  | 0        | 0.04 |
| A_23_P401    | CENPF      | NM_016343      | ref Homo sapiens centromere protein F, 350/400ka (mitosin) (CENPF), mRNA [NM_016343]                                                                  | 1.03 | 13.45 | 12.48 | 3.76E-07 | 0    |
| A_23_P84836  | NPEPPS     | NM_006310      | ref Homo sapiens aminopeptidase puromycin sensitive (NPEPPS), mRNA [NM_006310]                                                                        | 1.03 | 10.02 | 6.93  | 5.60E-05 | 0.02 |

|              |          |           |                                                                                                                             |      |       |       |          |      |
|--------------|----------|-----------|-----------------------------------------------------------------------------------------------------------------------------|------|-------|-------|----------|------|
| A_23_P3302   | MNS1     | NM_018365 | ref Homo sapiens meiosis-specific nuclear structural 1 (MNS1), mRNA [NM_018365]                                             | 1.02 | 8.67  | 7.14  | 4.38E-05 | 0.02 |
| A_24_P288979 | GNPTAB   | NM_024312 | ref Homo sapiens N-acetylglucosamine-1-phosphate transferase, alpha and beta subunits (GNPTAB), mRNA [NM_024312]            | 1.02 | 7.63  | 8.52  | 1.02E-05 | 0.01 |
| A_24_P273132 | GPSM2    | NM_013296 | ref Homo sapiens G-protein signaling modulator 2 (AGS3-like, C. elegans) (GPSM2), mRNA [NM_013296]                          | 1.01 | 8.37  | 8.91  | 7.06E-06 | 0.01 |
| A_23_P356684 | ANLN     | NM_018685 | ref Homo sapiens anillin, actin binding protein (ANLN), mRNA [NM_018685]                                                    | 1    | 10.66 | 10.36 | 1.93E-06 | 0.01 |
| A_24_P188105 | KIAA0280 | D87470    | gb Homo sapiens mRNA for KIAA0280 gene, partial cds. [D87470]                                                               | 0.99 | 7.52  | 5.26  | 0        | 0.04 |
| A_24_P945147 | RABEP1   | NM_004703 | ref Homo sapiens rabaptin, RAB GTPase binding effector protein 1 (RABEP1), transcript variant 1, mRNA [NM_004703]           | 0.99 | 9.76  | 4.61  | 0        | 0.05 |
| A_24_P941505 | FAM120A  | NM_014612 | ref Homo sapiens family with sequence similarity 120A (FAM120A), mRNA [NM_014612]                                           | 0.99 | 10.49 | 5.16  | 0        | 0.04 |
| A_24_P18105  | ASPH     | NM_032466 | ref Homo sapiens aspartate beta-hydroxylase (ASPH), transcript variant 3, mRNA [NM_032466]                                  | 0.99 | 8.54  | 7.03  | 4.98E-05 | 0.02 |
| A_24_P942786 | DYRK2    | AK024870  | gb Homo sapiens cDNA: FLJ21217 fis, clone COL00536. [AK024870]                                                              | 0.99 | 8.47  | 6.09  | 0        | 0.02 |
| A_32_P123743 | KCNQ1OT1 | NR_002728 | ref Homo sapiens KCNQ1 overlapping transcript 1 (non-protein coding) (KCNQ1OT1) on chromosome 11 [NR_002728]                | 0.99 | 9.53  | 4.67  | 0        | 0.05 |
| A_24_P316305 | AQR      | AK001173  | gb Homo sapiens cDNA FLJ10311 fis, clone NT2RM2000359, highly similar to Homo sapiens mRNA for KIAA0560 protein. [AK001173] | 0.98 | 9.59  | 5.06  | 0        | 0.04 |
| A_23_P32903  | OCRL     | NM_000276 | ref Homo sapiens oculocerebrorenal syndrome of Lowe (OCRL), transcript variant a, mRNA [NM_000276]                          | 0.98 | 11.23 | 6.53  | 8.89E-05 | 0.02 |

|              |            |              |                                                                                                                        |      |       |       |          |      |
|--------------|------------|--------------|------------------------------------------------------------------------------------------------------------------------|------|-------|-------|----------|------|
| A_23_P349083 | FCHO2      | NM_138782    | ref Homo sapiens FCH domain only 2 (FCHO2), mRNA [NM_138782]                                                           | 0.98 | 9.29  | 7.12  | 4.49E-05 | 0.02 |
| A_23_P115167 | LRRRC8B    | NM_015350    | ref Homo sapiens leucine rich repeat containing 8 family, member B (LRRRC8B), mRNA [NM_015350]                         | 0.97 | 9.54  | 5.85  | 0        | 0.03 |
| A_32_P80678  | ADAM9      | NM_001005845 | ref Homo sapiens ADAM metalloproteinase domain 9 (meltrin gamma) (ADAM9), transcript variant 2, mRNA [NM_001005845]    | 0.97 | 8.08  | 5.16  | 0        | 0.04 |
| A_32_P145385 | AK001118   | AK001118     | gb Homo sapiens cDNA FLJ10256 fis, clone HEMBB1000870. [AK001118]                                                      | 0.97 | 5.97  | 4.72  | 0        | 0.04 |
| A_23_P28797  | THC2525955 | THC2525955   | tr Q3T035_BOVIN (Q3T035) Actin related protein 2/3 complex, subunit 3, 21kDa, partial (53%) [THC2525955]               | 0.97 | 14.02 | 5.37  | 0        | 0.03 |
| A_24_P96780  | CENPF      | NM_016343    | ref Homo sapiens centromere protein F, 350/400ka (mitosin) (CENPF), mRNA [NM_016343]                                   | 0.96 | 7.59  | 11.31 | 8.94E-07 | 0    |
| A_23_P168669 | CROT       | NM_021151    | ref Homo sapiens carnitine O-octanoyltransferase (CROT), mRNA [NM_021151]                                              | 0.96 | 8.01  | 4.56  | 0        | 0.05 |
| A_24_P373152 | CFL2       | NM_021914    | ref Homo sapiens cofilin 2 (muscle) (CFL2), transcript variant 1, mRNA [NM_021914]                                     | 0.96 | 8.06  | 5.03  | 0        | 0.04 |
| A_24_P945000 | FAM33A     | NM_182620    | family with sequence similarity 33, member A (FAM33A), transcript variant 1, mRNA [NM_182620]                          | 0.95 | 10    | 5.77  | 0        | 0.03 |
| A_24_P58647  | LOC441131  | XR_018731    | ref PREDICTED: Homo sapiens misc_RNA (LOC441131), miscRNA [XR_018731]                                                  | 0.94 | 14.07 | 5.09  | 0        | 0.04 |
| A_23_P3204   | MAPK6      | NM_002748    | ref Homo sapiens mitogen-activated protein kinase 6 (MAPK6), mRNA [NM_002748]                                          | 0.94 | 12.92 | 5.8   | 0        | 0.03 |
| A_24_P46953  | SGK3       | NM_013257    | ref Homo sapiens serum/glucocorticoid regulated kinase family, member 3 (SGK3), transcript variant 1, mRNA [NM_013257] | 0.94 | 11.01 | 8.41  | 1.14E-05 | 0.01 |
| A_32_P170664 | AK024898   | AK024898     | gb Homo sapiens cDNA: FLJ21245 fis, clone COL01184. [AK024898]                                                         | 0.94 | 8.72  | 4.89  | 0        | 0.04 |

|              |                 |                 |                                                                                                                                                                                                  |      |       |       |          |      |
|--------------|-----------------|-----------------|--------------------------------------------------------------------------------------------------------------------------------------------------------------------------------------------------|------|-------|-------|----------|------|
| A_24_P104278 | ENST00000395606 | ENST00000395606 | ens Probable phospholipase DDHD1 (EC 3.1.1.-) (DDHD domain protein 1) (Phosphatidic acid-preferring phospholipase A1 homolog) (PA-PLA1). [Source:Uniprot/SwissProt;Acc:Q8NEL9] [ENST00000395606] | 0.93 | 7.81  | 5.21  | 0        | 0.04 |
| A_32_P122285 | BI013473        | BI013473        | gb RC0-ET0185-220101-021-h02 ET0185 Homo sapiens cDNA, mRNA sequence [BI013473]                                                                                                                  | 0.92 | 11.07 | 6.39  | 0        | 0.02 |
| A_24_P642771 | AK024956        | AK024956        | gb Homo sapiens cDNA: FLJ21303 fis, clone COL02107. [AK024956]                                                                                                                                   | 0.92 | 5.73  | 4.77  | 0        | 0.04 |
| A_23_P20852  | AUH             | NM_001698       | ref Homo sapiens AU RNA binding protein/enoyl-Coenzyme A hydratase (AUH), nuclear gene encoding mitochondrial protein, mRNA [NM_001698]                                                          | 0.92 | 9.73  | 14.92 | 7.58E-08 | 0    |
| A_24_P143888 | C9orf86         | NM_024718       | ref Homo sapiens chromosome 9 open reading frame 86 (C9orf86), mRNA [NM_024718]                                                                                                                  | 0.92 | 11.07 | 4.97  | 0        | 0.04 |
| A_23_P320897 | C1orf218        | NM_019049       | ref Homo sapiens chromosome 1 open reading frame 218 (C1orf218), mRNA [NM_019049]                                                                                                                | 0.91 | 8.72  | 6.65  | 7.74E-05 | 0.02 |
| A_24_P255303 | LOC391160       | XR_018489       | gb Homo sapiens similar to Actin-related protein 2 [XR_018489]                                                                                                                                   | 0.91 | 14.3  | 5.16  | 0        | 0.04 |
| A_23_P92765  | CCDC112         | NM_001040440    | ref Homo sapiens coiled-coil domain containing 112 (CCDC112), transcript variant 1, mRNA [NM_001040440]                                                                                          | 0.9  | 9.84  | 4.71  | 0        | 0.05 |
| A_32_P155645 | CCDC112         | NM_001040440    | ref Homo sapiens coiled-coil domain containing 112 (CCDC112), transcript variant 1, mRNA [NM_001040440]                                                                                          | 0.89 | 7.8   | 4.52  | 0        | 0.05 |
| A_32_P83453  | XR_018202       | XR_018202       | Homo sapiens similar to Tetratricopeptide repeat protein 3 (TPR repeat protein 3) (TPR repeat protein D) (LOC647768), mRNA                                                                       | 0.89 | 10.75 | 6.36  | 0        | 0.02 |

|              |            |            |                                                                                                                               |      |       |      |          |      |
|--------------|------------|------------|-------------------------------------------------------------------------------------------------------------------------------|------|-------|------|----------|------|
| A_23_P102391 | SLC40A1    | NM_014585  | ref Homo sapiens solute carrier family 40 (iron-regulated transporter), member 1 (SLC40A1), mRNA [NM_014585]                  | 0.89 | 11.44 | 5.4  | 0        | 0.03 |
| A_32_P214471 | BX116720   | BX116720   | gb BX116720 Soares_testis_NHT Homo sapiens cDNA clone IMAGE:998F241782, mRNA sequence [BX116720]                              | 0.88 | 7.37  | 4.88 | 0        | 0.04 |
| A_32_P76156  | RWDD4A     | NM_152682  | ref Homo sapiens RWD domain containing 4A (RWDD4A), mRNA [NM_152682]                                                          | 0.87 | 8.2   | 4.46 | 0        | 0.05 |
| A_24_P895836 | BC016022   | BC016022   | gb Homo sapiens, clone IMAGE:4720764, mRNA, [BC016022]                                                                        | 0.87 | 6.91  | 4.67 | 0        | 0.05 |
| A_23_P70746  | AHI1       | NM_017651  | ref Homo sapiens Abelson helper integration site 1 (AHI1), mRNA [NM_017651]                                                   | 0.87 | 7.65  | 5.52 | 0        | 0.03 |
| A_24_P261052 | MTMR9      | NM_015458  | ref Homo sapiens myotubularin related protein 9 (MTMR9), mRNA [NM_015458]                                                     | 0.87 | 8.61  | 6.12 | 0        | 0.02 |
| A_24_P137563 | SCLT1      | NM_144643  | ref Homo sapiens sodium channel and clathrin linker 1 (SCLT1), mRNA [NM_144643]                                               | 0.87 | 7.77  | 4.63 | 0        | 0.05 |
| A_32_P5168   | THC2717828 | THC2717828 | Unknown                                                                                                                       | 0.87 | 6.03  | 4.75 | 0        | 0.04 |
| A_23_P48669  | CDKN3      | NM_005192  | ref Homo sapiens cyclin-dependent kinase inhibitor 3 (CDK2-associated dual specificity phosphatase) (CDKN3), mRNA [NM_005192] | 0.87 | 12.3  | 8.88 | 7.24E-06 | 0.01 |
| A_32_P6682   | BQ926066   | BQ926066   | gb AGENCOURT_8878877 Lupski_sciatic_nerve Homo sapiens cDNA clone IMAGE:6202171 5', mRNA sequence [BQ926066]                  | 0.87 | 8.78  | 5.64 | 0        | 0.03 |
| A_23_P106241 | TRIP11     | NM_004239  | ref Homo sapiens thyroid hormone receptor interactor 11 (TRIP11), mRNA [NM_004239]                                            | 0.86 | 10.3  | 5.38 | 0        | 0.03 |
| A_23_P160466 | SLC19A2    | NM_006996  | ref Homo sapiens solute carrier family 19 (thiamine transporter), member 2 (SLC19A2), mRNA                                    | 0.86 | 11.04 | 5.43 | 0        | 0.03 |
| A_24_P925211 | AK125129   | AK125129   | gb Homo sapiens cDNA FLJ43139 fis, clone CTONG3007444, [AK125129]                                                             | 0.86 | 5.19  | 4.73 | 0        | 0.04 |

|              |          |           |                                                                                                                                             |      |       |       |          |      |
|--------------|----------|-----------|---------------------------------------------------------------------------------------------------------------------------------------------|------|-------|-------|----------|------|
| A_24_P320880 | SNX16    | NM_022133 | ref Homo sapiens sorting nexin 16 (SNX16), transcript variant 1, mRNA [NM_022133]                                                           | 0.86 | 7.12  | 5.19  | 0        | 0.04 |
| A_23_P88209  | SCFD1    | NM_016106 | ref Homo sapiens sec1 family domain containing 1 (SCFD1), transcript variant 1, mRNA [NM_016106]                                            | 0.86 | 11.37 | 5.02  | 0        | 0.04 |
| A_23_P170280 | ATP10D   | NM_020453 | ref Homo sapiens ATPase, class V, type 10D (ATP10D), mRNA [NM_020453]                                                                       | 0.85 | 8.55  | 4.7   | 0        | 0.05 |
| A_23_P258221 | ABCC5    | NM_005688 | ref Homo sapiens ATP-binding cassette, sub-family C (CFTR/MRP), member 5 (ABCC5), transcript variant 1, mRNA [NM_005688]                    | 0.85 | 10.95 | 5.67  | 0        | 0.03 |
| A_32_P757733 | CEP70    | NM_024491 | ref Homo sapiens centrosomal protein 70kDa (CEP70), mRNA [NM_024491]                                                                        | 0.85 | 8.52  | 7.9   | 1.93E-05 | 0.01 |
| A_32_P210202 | E2F7     | NM_203394 | ref Homo sapiens E2F transcription factor 7 (E2F7), mRNA [NM_203394]                                                                        | 0.85 | 10.51 | 4.64  | 0        | 0.05 |
| A_32_P145355 | BE156557 | BE156557  | gb BE156557.QV0-HT0368-090200-099-d10 HT0368 Homo sapiens cDNA, mRNA sequence [BE156557]                                                    | 0.85 | 7.81  | 6.25  | 0        | 0.02 |
| A_23_P417974 | AQP11    | NM_173039 | ref Homo sapiens aquaporin 11 (AQP11), mRNA [NM_173039]                                                                                     | 0.84 | 5.69  | 5.36  | 0        | 0.03 |
| A_32_P157295 | AK026338 | AK026338  | gb Homo sapiens cDNA: FLJ22685 fis, clone HSI10917. [AK026338]                                                                              | 0.84 | 7.67  | 6.16  | 0        | 0.02 |
| A_23_P144384 | GALNT7   | NM_017423 | ref Homo sapiens UDP-N-acetyl-alpha-D-galactosamine:poly peptide N-acetylgalactosaminyltransferase 7 (GalNAc-T7) (GALNT7), mRNA [NM_017423] | 0.84 | 11.09 | 5.42  | 0        | 0.03 |
| A_23_P258891 | SNX16    | NM_022133 | ref Homo sapiens sorting nexin 16 (SNX16), transcript variant 1, mRNA [NM_022133]                                                           | 0.84 | 8.58  | 6.4   | 0        | 0.02 |
| A_24_P172768 | GMFB     | NM_004124 | ref Homo sapiens glia maturation factor, beta (GMFB), mRNA [NM_004124]                                                                      | 0.84 | 9.42  | 6.1   | 0        | 0.02 |
| A_24_P246361 | IQGAP2   | NM_006633 | ref Homo sapiens IQ motif containing GTPase activating protein 2 (IQGAP2), mRNA [NM_006633]                                                 | 0.83 | 8.62  | 10.68 | 1.48E-06 | 0.01 |
| A_23_P89123  | CFDP1    | NM_006324 | ref Homo sapiens craniofacial development protein 1 (CFDP1), mRNA [NM_006324]                                                               | 0.83 | 13.06 | 7.68  | 2.44E-05 | 0.01 |



|              |          |           |                                                                                                                                                                                                 |      |       |      |          |      |
|--------------|----------|-----------|-------------------------------------------------------------------------------------------------------------------------------------------------------------------------------------------------|------|-------|------|----------|------|
| A_23_P213661 | HISPPD1  | NM_015216 | ref Homo sapiens histidine acid phosphatase domain containing 1 (HISPPD1), mRNA [NM_015216]                                                                                                     | 0.83 | 11.89 | 4.71 | 0        | 0.05 |
| A_23_P90659  | LAPTM4A  | NM_014713 | ref Homo sapiens lysosomal-associated protein transmembrane 4 alpha (LAPTM4A), mRNA [NM_014713]                                                                                                 | 0.83 | 14.17 | 5.08 | 0        | 0.04 |
| A_23_P203009 | CUL5     | NM_003478 | cullin 5 (CUL5), mRNA [NM_003478]                                                                                                                                                               | 0.83 | 8.98  | 4.55 | 0        | 0.05 |
| A_32_P165330 | TTC3     | NM_003316 | ref Homo sapiens tetratricopeptide repeat domain 3 (TTC3), transcript variant 1, mRNA [NM_003316]                                                                                               | 0.83 | 8.69  | 5.79 | 0        | 0.03 |
| A_23_P74799  | SLC25A24 | NM_213651 | ref Homo sapiens solute carrier family 25 (mitochondrial carrier; phosphate carrier), member 24 (SLC25A24), nuclear gene encoding mitochondrial protein, transcript variant 2, mRNA [NM_213651] | 0.82 | 11.86 | 4.89 | 0        | 0.04 |
| A_24_P333663 | MAPK6    | NM_002748 | ref Homo sapiens mitogen-activated protein kinase 6 (MAPK6), mRNA [NM_002748]                                                                                                                   | 0.82 | 9.65  | 6.96 | 5.42E-05 | 0.02 |
| A_23_P213661 | HISPPD1  | NM_015216 | ref Homo sapiens histidine acid phosphatase domain containing 1 (HISPPD1), mRNA [NM_015216]                                                                                                     | 0.82 | 11.8  | 4.84 | 0        | 0.04 |
| A_23_P136058 | ATR      | NM_001184 | ref Homo sapiens ataxia telangiectasia and Rad3 related (ATR), mRNA [NM_001184]                                                                                                                 | 0.82 | 10.23 | 7.18 | 4.20E-05 | 0.02 |
| A_23_P219188 | C9orf86  | NM_024718 | ref Homo sapiens chromosome 9 open reading frame 86 (C9orf86), mRNA [NM_024718]                                                                                                                 | 0.82 | 12.95 | 5.18 | 0        | 0.04 |
| A_23_P134925 | BNIP3L   | NM_004331 | ref Homo sapiens BCL2/adenovirus E1B 19kDa interacting protein 3 like (BNIP3L), mRNA [NM_004331]                                                                                                | 0.82 | 12.99 | 5.51 | 0        | 0.03 |
| A_24_P844995 | AK054826 | AK054826  | gb Homo sapiens cDNA FLJ30264 fis, clone BRACE2002613, moderately similar to Rattus norvegicus rsly1p mRNA. [AK054826]                                                                          | 0.82 | 10.64 | 5.05 | 0        | 0.04 |

|              |            |              |                                                                                                                                   |      |       |      |          |      |
|--------------|------------|--------------|-----------------------------------------------------------------------------------------------------------------------------------|------|-------|------|----------|------|
| A_23_P202029 | ERLIN1     | BC031791     | gb Homo sapiens ER lipid raft associated 1, mRNA (cDNA clone MGC:24915 IMAGE:4214940), complete cds. [BC031791]                   | 0.81 | 13.27 | 4.8  | 0        | 0.04 |
| A_32_P9253   | THC2620541 | THC2620541   | thc Q8WYP8_HUMAN (Q8WYP8) Mid-1-related chloride channel 4 (Mid-1-related chloride channel 1) (MCLC), partial (17%) [THC2620541]  | 0.81 | 5.17  | 4.48 | 0        | 0.05 |
| A_23_P213661 | HISPPD1    | NM_015216    | ref Homo sapiens histidine acid phosphatase domain containing 1 (HISPPD1), mRNA [NM_015216]                                       | 0.81 | 11.63 | 4.73 | 0        | 0.04 |
| A_23_P213661 | HISPPD1    | NM_015216    | ref Homo sapiens histidine acid phosphatase domain containing 1 (HISPPD1), mRNA [NM_015216]                                       | 0.81 | 11.68 | 4.78 | 0        | 0.04 |
| A_24_P64241  | ANKRD20A2  | NM_001012421 | ref Homo sapiens ankyrin repeat domain 20 family, member A2 (ANKRD20A2), mRNA [NM_001012421]                                      | 0.81 | 6.76  | 4.9  | 0        | 0.04 |
| A_23_P213661 | HISPPD1    | NM_015216    | ref Homo sapiens histidine acid phosphatase domain containing 1 (HISPPD1), mRNA [NM_015216]                                       | 0.81 | 11.97 | 4.83 | 0        | 0.04 |
| A_23_P213661 | HISPPD1    | NM_015216    | ref Homo sapiens histidine acid phosphatase domain containing 1 (HISPPD1), mRNA [NM_015216]                                       | 0.81 | 11.91 | 4.72 | 0        | 0.04 |
| A_24_P249824 | DYRK2      | NM_006482    | ref Homo sapiens dual-specificity tyrosine-(Y)-phosphorylation regulated kinase 2 (DYRK2), transcript variant 2, mRNA [NM_006482] | 0.81 | 7.95  | 7.12 | 4.52E-05 | 0.02 |
| A_32_P81092  | THC2614876 | THC2614876   | Unknown                                                                                                                           | 0.81 | 7.4   | 4.94 | 0        | 0.04 |
| A_23_P213661 | HISPPD1    | NM_015216    | ref Homo sapiens histidine acid phosphatase domain containing 1 (HISPPD1), mRNA [NM_015216]                                       | 0.8  | 11.88 | 4.77 | 0        | 0.04 |
| A_23_P213661 | HISPPD1    | NM_015216    | ref Homo sapiens histidine acid phosphatase domain containing 1 (HISPPD1), mRNA [NM_015216]                                       | 0.8  | 11.41 | 4.48 | 0        | 0.05 |
| A_23_P376599 | RALBP1     | NM_006788    | ref Homo sapiens ralA binding protein 1 (RALBP1), mRNA [NM_006788]                                                                | 0.8  | 14.13 | 4.79 | 0        | 0.04 |

|              |            |            |                                                                                                                           |      |       |      |          |      |
|--------------|------------|------------|---------------------------------------------------------------------------------------------------------------------------|------|-------|------|----------|------|
| A_32_P107219 | THC2525583 | THC2525583 | ref Mus musculus Ig heavy chain precursor (Mus musculus) (exp=-1; wgp=0; cg=0), partial (26%) [THC2525583]                | 0.8  | 6.75  | 6.41 | 0        | 0.02 |
| A_23_P303718 | DST        | NM_015548  | ref Homo sapiens dystonin (DST), transcript variant 1eA, mRNA [NM_015548]                                                 | 0.8  | 7.99  | 6.1  | 0        | 0.02 |
| A_23_P213661 | HISPPD1    | NM_015216  | ref Homo sapiens histidine acid phosphatase domain containing 1 (HISPPD1), mRNA [NM_015216]                               | 0.79 | 11.83 | 4.7  | 0        | 0.05 |
| A_23_P215070 | TSGA14     | NM_018718  | ref Homo sapiens testis specific, 14 (TSGA14), mRNA [NM_018718]                                                           | 0.79 | 9.27  | 5.18 | 0        | 0.04 |
| A_23_P51627  | PPCS       | NM_024664  | ref Homo sapiens phosphopantothenoylcysteine synthetase (PPCS), transcript variant 1, mRNA [NM_024664]                    | 0.79 | 13.34 | 5.79 | 0        | 0.03 |
| A_23_P213661 | HISPPD1    | NM_015216  | ref Homo sapiens histidine acid phosphatase domain containing 1 (HISPPD1), mRNA [NM_015216]                               | 0.78 | 11.92 | 4.69 | 0        | 0.05 |
| A_23_P207811 | PAIP1      | NM_006451  | ref Homo sapiens poly(A) binding protein interacting protein 1 (PAIP1), transcript variant 1, mRNA [NM_006451]            | 0.78 | 12.06 | 5.36 | 0        | 0.03 |
| A_23_P162378 | CCDC41     | NM_016122  | ref Homo sapiens coiled-coil domain containing 41 (CCDC41), transcript variant 1, mRNA [NM_016122]                        | 0.78 | 8.72  | 4.9  | 0        | 0.04 |
| A_24_P227069 | GPAM       | NM_020918  | glycerol-3-phosphate acyltransferase, mitochondrial (GPAM), nuclear gene encoding mitochondrial protein, mRNA [NM_020918] | 0.78 | 9.31  | 6.85 | 6.10E-05 | 0.02 |
| A_23_P18656  | SCLT1      | NM_144643  | ref Homo sapiens sodium channel and clathrin linker 1 (SCLT1), mRNA [NM_144643]                                           | 0.78 | 8.27  | 5.06 | 0        | 0.04 |
| A_32_P524014 | UTRN       | NM_007124  | utrophin (UTRN), mRNA [NM_007124]                                                                                         | 0.78 | 10.09 | 7.21 | 4.07E-05 | 0.02 |
| A_24_P549553 | TTC3       | NM_003316  | ref Homo sapiens tetratricopeptide repeat domain 3 (TTC3), transcript variant 1, mRNA [NM_003316]                         | 0.78 | 7.61  | 6.19 | 0        | 0.02 |
| A_23_P63402  | GPSM2      | NM_013296  | ref Homo sapiens G protein signaling modulator 2 (AGS3-like, C. elegans) (GPSM2), mRNA [NM_013296]                        | 0.78 | 10.37 | 6.75 | 6.87E-05 | 0.02 |

|              |                 |                 |                                                                                                                      |      |       |      |          |      |
|--------------|-----------------|-----------------|----------------------------------------------------------------------------------------------------------------------|------|-------|------|----------|------|
| A_24_P104174 | TAOK3           | NM_016281       | ref Homo sapiens TAO kinase 3 (TAOK3), mRNA [NM_016281]                                                              | 0.78 | 14.08 | 8.58 | 9.69E-06 | 0.01 |
| A_24_P84984  | TTC3            | NM_003316       | ref Homo sapiens tetratricopeptide repeat domain 3 (TTC3), transcript variant 1, mRNA [NM_003316]                    | 0.77 | 9.79  | 6.63 | 7.89E-05 | 0.02 |
| A_23_P52017  | ASPM            | NM_018136       | ref Homo sapiens asp (abnormal spindle) homolog, microcephaly associated (Drosophila) (ASPM), mRNA [NM_018136]       | 0.77 | 11.2  | 5.69 | 0        | 0.03 |
| A_23_P105856 | SLC46A3         | NM_181785       | ref Homo sapiens solute carrier family 46, member 3 (SLC46A3), mRNA [NM_181785]                                      | 0.77 | 6.41  | 6.28 | 0        | 0.02 |
| A_23_P369047 | ENST00000324982 | ENST00000324982 | gb Homo sapiens cDNA FLJ43379 fis, clone OCBBF2002626. [AK125369]                                                    | 0.77 | 8.81  | 4.79 | 0        | 0.04 |
| A_32_P204330 | AK093982        | AK093982        | gb Homo sapiens cDNA FLJ36663 fis, clone UTERU2002826. [AK093982]                                                    | 0.77 | 8     | 7.95 | 1.82E-05 | 0.01 |
| A_23_P118327 | THUMPD1         | NM_017736       | ref Homo sapiens THUMP domain containing 1 (THUMPD1), mRNA [NM_017736]                                               | 0.77 | 10.87 | 4.5  | 0        | 0.05 |
| A_24_P296568 | CBX1            | NM_006807       | ref Homo sapiens chromobox homolog 1 (HP1 beta homolog Drosophila) (CBX1), mRNA [NM_006807]                          | 0.77 | 13.33 | 4.84 | 0        | 0.04 |
| A_23_P21473  | CEP70           | NM_024491       | ref Homo sapiens centrosomal protein 70kDa (CEP70), mRNA [NM_024491]                                                 | 0.77 | 9.42  | 6.12 | 0        | 0.02 |
| A_23_P70660  | FAM46A          | NM_017633       | ref Homo sapiens family with sequence similarity 46, member A (FAM46A), mRNA [NM_017633]                             | 0.77 | 13.82 | 4.64 | 0        | 0.05 |
| A_23_P404211 | FANCM           | NM_020937       | ref Homo sapiens Fanconi anemia, complementation group M (FANCM), mRNA [NM_020937]                                   | 0.77 | 6.6   | 4.54 | 0        | 0.05 |
| A_32_P399546 | ARNTL2          | AF256215        | ref Homo sapiens cycle-like factor CLIF mRNA, complete cds. [AF256215]                                               | 0.77 | 8.97  | 4.78 | 0        | 0.04 |
| A_24_P210888 | SMURF2          | AK002019        | gb Homo sapiens cDNA FLJ11157 fis, clone PLACE1006961. [AK002019]                                                    | 0.77 | 6.47  | 5.54 | 0        | 0.03 |
| A_23_P72680  | IFT81           | NM_014055       | ref Homo sapiens intraflagellar transport 81 homolog (Chlamydomonas) (IFT81), transcript variant 1, mRNA [NM_014055] | 0.76 | 6.47  | 6.91 | 5.71E-05 | 0.02 |

|              |                 |                 |                                                                                                                           |      |       |      |          |      |
|--------------|-----------------|-----------------|---------------------------------------------------------------------------------------------------------------------------|------|-------|------|----------|------|
| A_23_P102060 | SSFA2           | NM_006751       | ref Homo sapiens sperm specific antigen 2 (SSFA2), mRNA [NM_006751]                                                       | 0.76 | 11.19 | 5.15 | 0        | 0.04 |
| A_23_P392529 | ENST00000344693 | ENST00000344693 | ens Uncharacterized protein C21orf81. [Source:Uniprot/SwissProt;Acc:Q8NFU9] [ENST00000344693]                             | 0.76 | 7.41  | 5    | 0        | 0.04 |
| A_24_P713312 | THC2639056      | THC2639056      | chr ALU8_HUMAN (P39195) Alu subfamily SX sequence contamination warning entry, partial (10%) [THC2639056]                 | 0.76 | 7.02  | 4.5  | 0        | 0.05 |
| A_23_P363936 | HSPA4L          | NM_014278       | ref Homo sapiens heat shock 70kDa protein 4-like (HSPA4L), mRNA [NM_014278]                                               | 0.76 | 9.95  | 6.43 | 0        | 0.02 |
| A_32_P106732 | FANCM           | NM_020937       | ref Homo sapiens Fanconi anemia, complementation group M (FANCM), mRNA [NM_020937]                                        | 0.76 | 8.91  | 5.4  | 0        | 0.03 |
| A_23_P21230  | TRIM37          | NM_015294       | ref Homo sapiens tripartite motif-containing 37 (TRIM37), transcript variant 1, mRNA [NM_015294]                          | 0.76 | 10.01 | 5.64 | 0        | 0.03 |
| A_24_P910833 | ZNF286A         | AF086305        | gen Homo sapiens full length insert cDNA clone ZD50H12. [AF086305]                                                        | 0.75 | 8.74  | 7.88 | 1.97E-05 | 0.01 |
| A_24_P380132 | G3BP2           | NM_203505       | ref Homo sapiens GTPase activating protein (SH3 domain) binding protein 2 (G3BP2), transcript variant 1, mRNA [NM_203505] | 0.75 | 13.9  | 5.28 | 0        | 0.04 |
| A_24_P90878  | THUMP1          | NM_017736       | ref Homo sapiens THUMP domain containing 1 (THUMP1), mRNA [NM_017736]                                                     | 0.75 | 9.83  | 4.51 | 0        | 0.05 |
| A_24_P387869 | PKN2            | NM_006256       | ref Homo sapiens protein kinase N2 (PKN2), mRNA [NM_006256]                                                               | 0.75 | 7.54  | 5.93 | 0        | 0.03 |
| A_24_P868583 | ANKRD20A2       | NM_001012421    | ref Homo sapiens ankyrin repeat domain 20 family, member A2 (ANKRD20A2), mRNA [NM_001012421]                              | 0.75 | 7.52  | 8.77 | 8.08E-06 | 0.01 |
| A_24_P56240  | CPNE8           | NM_153634       | ref Homo sapiens copine VIII (CPNE8), mRNA [NM_153634]                                                                    | 0.75 | 9.72  | 6.27 | 0        | 0.02 |
| A_24_P388632 | PCGF3           | NM_006315       | ref Homo sapiens polycomb group ring finger 3 (PCGF3), mRNA [NM_006315]                                                   | 0.75 | 11.21 | 4.74 | 0        | 0.04 |
| A_32_P229299 | PHF6            | NM_032458       | ref Homo sapiens PHD finger protein 6 (PHF6), transcript variant 2, mRNA [NM_032458]                                      | 0.75 | 11.68 | 6.59 | 8.33E-05 | 0.02 |

|              |          |              |                                                                                                                          |      |       |      |          |      |
|--------------|----------|--------------|--------------------------------------------------------------------------------------------------------------------------|------|-------|------|----------|------|
| A_32_P177953 | CR598364 | CR598364     | gb full-length cDNA clone CS0CAP007YJ17 of Thymus of Homo sapiens (human). [CR598364]                                    | 0.75 | 11.24 | 6.04 | 0        | 0.02 |
| A_23_P206228 | VPS13C   | NM_020821    | ref Homo sapiens vacuolar protein sorting 13 homolog C (S. cerevisiae) (VPS13C), transcript variant 2A, mRNA [NM_020821] | 0.74 | 10.35 | 4.6  | 0        | 0.05 |
| A_32_P123966 | RPGRIP1L | NM_015272    | ref Homo sapiens RPGRIP1-like (RPGRIP1L), mRNA [NM_015272]                                                               | 0.74 | 6.92  | 6.34 | 0        | 0.02 |
| A_23_P53530  | MTERFD3  | NM_001033050 | ref Homo sapiens MTERF domain containing 3 (MTERFD3), transcript variant 1, mRNA [NM_001033050]                          | 0.74 | 9.15  | 6.22 | 0        | 0.02 |
| A_24_P236437 | DYNC1L12 | NM_006141    | ref Homo sapiens dynein, cytoplasmic 1, light intermediate chain 2 (DYNC1L12), mRNA [NM_006141]                          | 0.74 | 11.45 | 5.58 | 0        | 0.03 |
| A_23_P17503  | KIF16B   | NM_024704    | ref Homo sapiens kinesin family member 16B (KIF16B), mRNA [NM_024704]                                                    | 0.74 | 7.69  | 5.25 | 0        | 0.04 |
| A_23_P313728 | FAM98A   | NM_015475    | ref Homo sapiens family with sequence similarity 98, member A (FAM98A), mRNA [NM_015475]                                 | 0.74 | 9.85  | 5.23 | 0        | 0.04 |
| A_32_P150012 | CHD7     | NM_017780    | ref Homo sapiens chromodomain helicase DNA binding protein 7 (CHD7), mRNA [NM_017780]                                    | 0.74 | 10.99 | 4.74 | 0        | 0.04 |
| A_23_P350187 | TET2     | AB046766     | gb Homo sapiens mRNA for KIAA1546 protein, partial cds. [AB046766]                                                       | 0.74 | 9.19  | 6.82 | 6.37E-05 | 0.02 |
| A_32_P27706  | BC008192 | BC008192     | gb Homo sapiens HEAT repeat containing 2, mRNA (cDNA clone IMAGE:4213551), **** WARNING: chimeric clone ****. [BC008192] | 0.73 | 10.38 | 4.53 | 0        | 0.05 |
| A_23_P81463  | DHX29    | NM_019030    | ref Homo sapiens DEAH (Asp-Glu-Ala-His) box polypeptide 29 (DHX29), mRNA [NM_019030]                                     | 0.73 | 10.5  | 5.72 | 0        | 0.03 |
| A_32_P103695 | FAM92A1  | NM_145269    | ref Homo sapiens family with sequence similarity 92, member A1 (FAM92A1), mRNA [NM_145269]                               | 0.73 | 10.07 | 9.97 | 2.68E-06 | 0.01 |
| A_23_P124476 | CLCN3    | NM_173872    | ref Homo sapiens chloride channel 3 (CLCN3), transcript variant e, mRNA [NM_173872]                                      | 0.73 | 9.57  | 5.6  | 0        | 0.03 |

|              |              |                 |                                                                                                        |      |       |      |          |      |
|--------------|--------------|-----------------|--------------------------------------------------------------------------------------------------------|------|-------|------|----------|------|
| A_24_P320970 | C9orf41      | ENST00000376834 | ens Uncharacterized protein C9orf41. [Source:Uniprot/SwissProt;Acc:Q8N4J0] [ENST00000376834]           | 0.73 | 9.55  | 4.47 | 0        | 0.05 |
| A_24_P212072 | ANKRD32      | ENST00000255667 | domain-containing protein 32. [Source:Uniprot/SwissProt;Acc:Q9BQI6] [ENST00000255667]                  | 0.73 | 7.85  | 6.51 | 9.16E-05 | 0.02 |
| A_23_P371966 | KIAA1946     | AB075826        | mRNA for KIAA1946 protein. [AB075826]                                                                  | 0.73 | 7.9   | 8.11 | 1.56E-05 | 0.01 |
| A_24_P256692 | MIA3         | NM_198551       | ref Homo sapiens melanoma inhibitory activity family, member 3 (MIA3), mRNA [NM_198551]                | 0.73 | 7.93  | 4.79 | 0        | 0.04 |
| A_24_P364025 | UBE2D1       | NM_003338       | ref Homo sapiens ubiquitin-conjugating enzyme E2D 1 (UBC4/5 homolog, yeast) (UBE2D1), mRNA [NM_003338] | 0.73 | 8.36  | 5.13 | 0        | 0.04 |
| A_23_P65401  | CFL2         | NM_021914       | ref Homo sapiens cofilin 2 (muscle) (CFL2), transcript variant 1, mRNA [NM_021914]                     | 0.72 | 9.43  | 6.47 | 9.63E-05 | 0.02 |
| A_23_P259054 | SNX14        | NM_153816       | ref Homo sapiens sorting nexin 14 (SNX14), transcript variant 1, mRNA [NM_153816]                      | 0.72 | 13.37 | 4.85 | 0        | 0.04 |
| A_32_P131583 | A_32_P131583 | A_32_P131583    | Unknown                                                                                                | 0.72 | 7.09  | 5.9  | 0        | 0.03 |
| A_23_P121825 | FLJ13611     | NM_024941       | ref Homo sapiens hypothetical protein FLJ13611 (FLJ13611), transcript variant 2, mRNA [NM_024941]      | 0.72 | 9.94  | 5.03 | 0        | 0.04 |
| A_24_P138022 | FAM120A      | NM_014612       | ref Homo sapiens family with sequence similarity 120A (FAM120A), mRNA [NM_014612]                      | 0.72 | 9.84  | 5.18 | 0        | 0.04 |
| A_23_P133691 | RRAGD        | NM_021244       | ref Homo sapiens Ras-related GTP binding D (RRAGD), mRNA [NM_021244]                                   | 0.72 | 9.37  | 5.06 | 0        | 0.04 |
| A_23_P41796  | MAP3K1       | NM_005921       | ref Homo sapiens mitogen-activated protein kinase kinase kinase 1 (MAP3K1), mRNA [NM_005921]           | 0.72 | 8.89  | 7.57 | 2.73E-05 | 0.01 |
| A_24_P366315 | KIF21A       | NM_017641       | ref Homo sapiens kinesin family member 21A (KIF21A), mRNA [NM_017641]                                  | 0.72 | 9.45  | 5.53 | 0        | 0.03 |
| A_24_P928038 | IDE          | BX648462        | gb Homo sapiens mRNA; cDNA DKFZp781M0420 (from clone DKFZp781M0420). [BX648462]                        | 0.72 | 10.68 | 7.27 | 3.79E-05 | 0.02 |

|              |               |           |                                                                                                                                      |      |       |      |          |      |
|--------------|---------------|-----------|--------------------------------------------------------------------------------------------------------------------------------------|------|-------|------|----------|------|
| A_23_P70998  | tcag7.903     | CR590623  | gb full-length cDNA clone CS0DF028YG12 of Fetal brain of Homo sapiens (human). [CR590623]                                            | 0.72 | 10.42 | 7.13 | 4.46E-05 | 0.02 |
| A_23_P89327  | ZNF286A       | NM_020652 | ref Homo sapiens zinc finger protein 286A (ZNF286A), mRNA [NM_020652]                                                                | 0.71 | 5.83  | 5.55 | 0        | 0.03 |
| A_24_P230457 | LOC131054     | XR_019283 | ref PREDICTED: Homo sapiens misc_RNA (LOC131054), miscRNA [XR_019283]                                                                | 0.71 | 12.66 | 4.95 | 0        | 0.04 |
| A_23_P303810 | DKFZp667G2110 | NM_153605 | ref Homo sapiens hypothetical protein DKFZp667G2110 (DKFZp667G2110), mRNA [NM_153605]                                                | 0.71 | 10.13 | 6.93 | 5.57E-05 | 0.02 |
| A_32_P196047 | DPY19L4       | NM_181787 | ref Homo sapiens dpy-19-like 4 (C. elegans) (DPY19L4), mRNA [NM_181787]                                                              | 0.71 | 9.45  | 4.86 | 0        | 0.04 |
| A_32_P50005  | DBT           | NM_001918 | ref Homo sapiens dihydroipoamide branched chain transacylase E2 (DBT), nuclear gene encoding mitochondrial protein, mRNA [NM_001918] | 0.71 | 8.35  | 5.55 | 0        | 0.03 |
| A_23_P118544 | CLTC          | NM_004859 | ref Homo sapiens clathrin, heavy chain (Hc) (CLTC), mRNA [NM_004859]                                                                 | 0.71 | 15.28 | 5.27 | 0        | 0.04 |
| A_24_P56270  | DYRK2         | NM_006482 | ref Homo sapiens dual-specificity tyrosine-(Y)-phosphorylation regulated kinase 2 (DYRK2), transcript variant 2, mRNA [NM_006482]    | 0.71 | 10.04 | 6.61 | 8.08E-05 | 0.02 |
| A_32_P14201  | XR_018202     | XR_018202 | Homo sapiens similar to Tetratricopeptide repeat protein 3 (TPR repeat protein 3) (TPR repeat protein D) (LOC647768), mRNA           | 0.71 | 8.47  | 6.16 | 0        | 0.02 |
| A_23_P204090 | PTPN11        | NM_002834 | ref Homo sapiens protein tyrosine phosphatase, non-receptor type 11 (Noonan syndrome 1) (PTPN11), mRNA [NM_002834]                   | 0.71 | 6.66  | 4.8  | 0        | 0.04 |
| A_23_P56505  | ITGA4         | NM_000885 | ref Homo sapiens integrin, alpha 4 (antigen CD49D, alpha 4 subunit of VLA-4 receptor) (ITGA4), mRNA [NM_000885]                      | 0.71 | 10    | 6.72 | 7.16E-05 | 0.02 |
| A_23_P126037 | RLF           | NM_012421 | ref Homo sapiens rearranged L-myc fusion (RLF), mRNA [NM_012421]                                                                     | 0.71 | 11.61 | 5.39 | 0        | 0.03 |



|              |                 |                 |                                                                                                                                   |     |       |      |          |      |
|--------------|-----------------|-----------------|-----------------------------------------------------------------------------------------------------------------------------------|-----|-------|------|----------|------|
| A_32_P120484 | THC2647388      | THC2647388      | thc Q4TD86_TETN G (Q4TD86) Chromosome undetermined SCAF6431, whole genome shotgun sequence. (Fragment), partial (9%) [THC2647388] | 0.7 | 6.61  | 4.55 | 0        | 0.05 |
| A_32_P55860  | FAM33A          | NM_182620       | family with sequence similarity 33, member A (FAM33A), transcript variant 1, mRNA [NM_182620]                                     | 0.7 | 8.69  | 5.55 | 0        | 0.03 |
| A_23_P160406 | KCTD3           | NM_016121       | ref Homo sapiens potassium channel tetramerisation domain containing 3 (KCTD3), mRNA [NM_016121]                                  | 0.7 | 11.46 | 6.36 | 0        | 0.02 |
| A_23_P395075 | JMJD1A          | NM_018433       | ref Homo sapiens jumonji domain containing 1A (JMJD1A), mRNA [NM_018433]                                                          | 0.7 | 9.21  | 6.59 | 8.27E-05 | 0.02 |
| A_32_P69465  | ENST00000340556 | ENST00000340556 | ens MORN repeat-containing protein 2 (MORN motif protein in testis). [Source:Uniprot/SwissProt;Acc:Q502X0] [ENST00000340556]      | 0.7 | 9.97  | 5.76 | 0        | 0.03 |
| A_24_P726336 | PHACTR2         | NM_001100164    | ref Homo sapiens phosphatase and actin regulator 2 (PHACTR2), transcript variant 1, mRNA [NM_001100164]                           | 0.7 | 10.07 | 5.02 | 0        | 0.04 |
| A_23_P346265 | GNPTAB          | NM_024312       | ref Homo sapiens N-acetylglucosaminyl-1-phosphate transferase, alpha and beta subunits (GNPTAB), mRNA [NM_024312]                 | 0.7 | 8.26  | 5.06 | 0        | 0.04 |
| A_32_P70875  | CD239706        | CD239706        | gb FNPBXF03 FNP Homo sapiens cDNA, mRNA sequence [CD239706]                                                                       | 0.7 | 8.04  | 4.56 | 0        | 0.05 |
| A_23_P17269  | CCDC88A         | NM_018084       | ref Homo sapiens coiled-coil domain containing 88A (CCDC88A), mRNA [NM_018084]                                                    | 0.7 | 8.14  | 4.51 | 0        | 0.05 |
| A_23_P350045 | REEP5           | NM_005669       | ref Homo sapiens receptor accessory protein 5 (REEP5), mRNA [NM_005669]                                                           | 0.7 | 11.38 | 4.67 | 0        | 0.05 |
| A_24_P346587 | MTFR1           | NM_014637       | ref Homo sapiens mitochondrial fission regulator 1 (MTFR1), nuclear gene encoding mitochondrial protein, mRNA [NM_014637]         | 0.7 | 10.26 | 6.68 | 7.47E-05 | 0.02 |
| A_23_P313734 | KIAA1731        | NM_033395       | ref Homo sapiens KIAA1731 (KIAA1731), mRNA [NM_033395]                                                                            | 0.7 | 10.68 | 4.6  | 0        | 0.05 |

|              |            |              |                                                                                                                |      |       |      |          |      |
|--------------|------------|--------------|----------------------------------------------------------------------------------------------------------------|------|-------|------|----------|------|
| A_32_P58937  | MBTD1      | NM_017643    | ref Homo sapiens mbt domain containing 1 (MBTD1), mRNA [NM_017643]                                             | 0.7  | 10.79 | 4.82 | 0        | 0.04 |
| A_32_P176675 | FAM92A1    | NM_145269    | ref Homo sapiens family with sequence similarity 92, member A1 (FAM92A1), mRNA [NM_145269]                     | 0.7  | 9.1   | 8.82 | 7.67E-06 | 0.01 |
| A_24_P133085 | CCDC90B    | NM_021825    | ref Homo sapiens coiled-coil domain containing 90B (CCDC90B), mRNA [NM_021825]                                 | 0.7  | 11.3  | 5.16 | 0        | 0.04 |
| A_23_P43150  | ZHX1       | NM_001017926 | ref Homo sapiens zinc fingers and homeoboxes 1 (ZHX1), transcript variant 1, mRNA [NM_001017926]               | 0.7  | 10.66 | 5.09 | 0        | 0.04 |
| A_23_P120710 | TTC3       | NM_003316    | ref Homo sapiens tetratricopeptide repeat domain 3 (TTC3), transcript variant 1, mRNA [NM_003316]              | 0.69 | 9.98  | 6.49 | 9.36E-05 | 0.02 |
| A_23_P54147  | NIN        | NM_016350    | ref Homo sapiens ninein (GSK3B interacting protein) (NIN), transcript variant 4, mRNA [NM_016350]              | 0.69 | 8.89  | 4.75 | 0        | 0.04 |
| A_24_P360529 | PDE7A      | NM_002604    | ref Homo sapiens phosphodiesterase 7A (PDE7A), transcript variant 2, mRNA [NM_002604]                          | 0.69 | 6.54  | 5.1  | 0        | 0.04 |
| A_23_P205007 | IPO5       | NM_002271    | importin 5 (IPO5), mRNA [NM_002271]                                                                            | 0.69 | 11.69 | 8.41 | 1.14E-05 | 0.01 |
| A_23_P88331  | DLG7       | NM_014750    | ref Homo sapiens discs, large homolog 7 (Drosophila) (DLG7), mRNA                                              | 0.69 | 11.91 | 9.4  | 4.47E-06 | 0.01 |
| A_23_P301079 | FAM33A     | NM_182620    | ref Homo sapiens family with sequence similarity 33, member A (FAM33A), transcript variant 1, mRNA [NM_182620] | 0.69 | 9.19  | 5.64 | 0        | 0.03 |
| A_23_P167905 | DUSP22     | AK000383     | gb Homo sapiens cDNA FLJ20376 fis. clone HUV01087. [AK000383]                                                  | 0.69 | 8.14  | 4.8  | 0        | 0.04 |
| A_24_P105761 | JMJD1A     | NM_018433    | ref Homo sapiens jumonji domain containing 1A (JMJD1A), mRNA [NM_018433]                                       | 0.69 | 10.52 | 6.5  | 9.24E-05 | 0.02 |
| A_32_P152544 | THC2775001 | THC2775001   | nc 200701201.1 HUMAN (Q96HI5) HIG2 protein, partial (27%) [THC2775001]                                         | 0.69 | 4.68  | 5.82 | 0        | 0.03 |
| A_32_P38426  | C10orf46   | NM_153810    | ref Homo sapiens chromosome 10 open reading frame 46 (C10orf46), mRNA [NM_153810]                              | 0.69 | 10.59 | 6.14 | 0        | 0.02 |

|              |           |           |                                                                                                                         |      |       |      |          |      |
|--------------|-----------|-----------|-------------------------------------------------------------------------------------------------------------------------|------|-------|------|----------|------|
| A_24_P44341  | UGCGL2    | NM_020121 | ref Homo sapiens UDP-glucose ceramide glucosyltransferase-like 2 (UGCGL2), mRNA [NM_020121]                             | 0.69 | 8.35  | 5.41 | 0        | 0.03 |
| A_24_P277456 | UBE2K     | NM_005339 | ref Homo sapiens ubiquitin-conjugating enzyme E2K (UBC1 homolog, yeast) (UBE2K), transcript variant 1, mRNA [NM_005339] | 0.69 | 11.89 | 4.73 | 0        | 0.04 |
| A_23_P73114  | PROS1     | NM_000313 | ref Homo sapiens protein S (alpha) (PROS1), mRNA [NM_000313]                                                            | 0.69 | 10.12 | 6.74 | 6.99E-05 | 0.02 |
| A_23_P91900  | SMC4      | NM_005496 | ref Homo sapiens structural maintenance of chromosomes 4 (SMC4), transcript variant 1, mRNA [NM_005496]                 | 0.69 | 12.54 | 4.65 | 0        | 0.05 |
| A_24_P359165 | SWAP70    | BC000134  | gb Homo sapiens SWAP-70 protein, mRNA (cDNA clone IMAGE:2900736), containing frame-shift errors. [BC000134]             | 0.68 | 7.23  | 7.85 | 2.03E-05 | 0.01 |
| A_23_P385126 | DEPDC7    | NM_139160 | ref Homo sapiens DEP domain containing 7 (DEPDC7), transcript variant 2, mRNA [NM_139160]                               | 0.68 | 8.21  | 6.19 | 0        | 0.02 |
| A_23_P53345  | ARNTL2    | NM_020183 | ref Homo sapiens aryl hydrocarbon receptor nuclear translocator-like 2 (ARNTL2), mRNA [NM_020183]                       | 0.68 | 7.94  | 5.26 | 0        | 0.04 |
| A_24_P342316 | FRYL      | NM_015030 | FRY-like (FRYL), mRNA [NM_015030]                                                                                       | 0.68 | 10.01 | 4.61 | 0        | 0.05 |
| A_24_P328668 | ARL13B    | NM_182896 | ref Homo sapiens ADP-ribosylation factor-like 13B (ARL13B), transcript variant 1, mRNA [NM_182896]                      | 0.68 | 8.71  | 5.04 | 0        | 0.04 |
| A_23_P406438 | SRPK2     | NM_182691 | ref Homo sapiens SFRS protein kinase 2 (SRPK2), transcript variant 2, mRNA [NM_182691]                                  | 0.68 | 9.74  | 6.84 | 6.20E-05 | 0.02 |
| A_23_P301051 | PAIP2B    | NM_020459 | ref Homo sapiens poly(A) binding protein interacting protein 2B (PAIP2B), mRNA [NM_020459]                              | 0.68 | 8.61  | 5.62 | 0        | 0.03 |
| A_24_P372553 | C10orf137 | NM_015608 | ref Homo sapiens chromosome 10 open reading frame 137 (C10orf137), mRNA [NM_015608]                                     | 0.68 | 8.84  | 4.87 | 0        | 0.04 |
| A_23_P48295  | CDADC1    | NM_030911 | ref Homo sapiens cytidine and dCMP deaminase domain containing 1 (CDADC1), mRNA [NM_030911]                             | 0.68 | 7.63  | 6.93 | 5.60E-05 | 0.02 |

|              |            |              |                                                                                                                                                                                                         |      |       |      |          |      |
|--------------|------------|--------------|---------------------------------------------------------------------------------------------------------------------------------------------------------------------------------------------------------|------|-------|------|----------|------|
| A_24_P238836 | XR_019164  | XR_019164    | Homo sapiens similar to RalA-binding protein 1 (RalBP1) (Ral-interacting protein 1) (76-kDa Ral-interacting protein) (Dinitrophenyl S-glutathione ATPase) (DNP-SG ATPase) (LOC129522), mRNA [XR_019164] | 0.68 | 11.64 | 4.98 | 0        | 0.04 |
| A_32_P177300 | THC2692669 | THC2692669   | thc ALU1_HUMAN (P39188) Alu subfamily J sequence contamination warning entry, partial (10%) [THC2692669]                                                                                                | 0.68 | 8.6   | 4.8  | 0        | 0.04 |
| A_23_P145984 | TSPAN12    | NM_012338    | ref Homo sapiens tetraspanin 12 (TSPAN12), mRNA [NM_012338]                                                                                                                                             | 0.68 | 6.13  | 6.81 | 6.44E-05 | 0.02 |
| A_23_P396777 | PCGF3      | NM_006315    | ref Homo sapiens polycomb group ring finger 3 (PCGF3), mRNA [NM_006315]                                                                                                                                 | 0.68 | 7.44  | 5.24 | 0        | 0.04 |
| A_24_P411899 | RNF19A     | NM_183419    | ref Homo sapiens ring finger protein 19A (RNF19A), transcript variant 1, mRNA [NM_183419]                                                                                                               | 0.67 | 9.1   | 4.88 | 0        | 0.04 |
| A_23_P258037 | JMJD1A     | NM_018433    | ref Homo sapiens jumonji domain containing 1A (JMJD1A), mRNA [NM_018433]                                                                                                                                | 0.67 | 10.01 | 6.14 | 0        | 0.02 |
| A_24_P413941 | FLJ38973   | NM_153689    | ref Homo sapiens hypothetical protein FLJ38973 (FLJ38973), mRNA [NM_153689]                                                                                                                             | 0.67 | 9.65  | 4.68 | 0        | 0.05 |
| A_23_P87773  | C12orf48   | NM_017915    | ref Homo sapiens chromosome 12 open reading frame 48 (C12orf48), mRNA [NM_017915]                                                                                                                       | 0.67 | 8.55  | 8.78 | 8.00E-06 | 0.01 |
| A_23_P17269  | CCDC88A    | NM_018084    | ref Homo sapiens coiled-coil domain containing 88A (CCDC88A), mRNA [NM_018084]                                                                                                                          | 0.67 | 8.22  | 4.49 | 0        | 0.05 |
| A_23_P17269  | CCDC88A    | NM_018084    | ref Homo sapiens coiled-coil domain containing 88A (CCDC88A), mRNA [NM_018084]                                                                                                                          | 0.67 | 8.3   | 4.59 | 0        | 0.05 |
| A_23_P51397  | ENAH       | NM_001008493 | ref Homo sapiens enabled homolog (Drosophila) (ENAH), transcript variant 1, mRNA [NM_001008493]                                                                                                         | 0.67 | 8.76  | 5.35 | 0        | 0.03 |
| A_32_P142991 | AK026351   | AK026351     | g0 Homo sapiens cDNA: FLJ22698 fis, clone HSI12044. [AK026351]                                                                                                                                          | 0.67 | 12.66 | 4.53 | 0        | 0.05 |

|              |              |              |                                                                                                                             |      |       |       |          |      |
|--------------|--------------|--------------|-----------------------------------------------------------------------------------------------------------------------------|------|-------|-------|----------|------|
| A_24_P201323 | ZMYND11      | NM_006624    | ref Homo sapiens zinc finger, MYND domain containing 11 (ZMYND11), transcript variant 1, mRNA [NM_006624]                   | 0.67 | 9.42  | 7.75  | 2.26E-05 | 0.01 |
| A_23_P207940 | PTPN2        | NM_080422    | ref Homo sapiens protein tyrosine phosphatase, non-receptor type 2 (PTPN2), transcript variant 2, mRNA [NM_080422]          | 0.67 | 12.39 | 5.18  | 0        | 0.04 |
| A_24_P391431 | TAF9B        | NM_015975    | ref Homo sapiens TAF9B RNA polymerase II, TATA box binding protein (TBP)-associated factor, 31kDa (TAF9B), mRNA [NM_015975] | 0.67 | 8.23  | 10.6  | 1.58E-06 | 0.01 |
| A_24_P119141 | PROS1        | NM_000313    | ref Homo sapiens protein S (alpha) (PROS1), mRNA [NM_000313]                                                                | 0.66 | 8.07  | 7.48  | 3.02E-05 | 0.02 |
| A_24_P19810  | PPCS         | NM_024664    | ref Homo sapiens phosphopantothonylcysteine synthetase (PPCS), transcript variant 1, mRNA [NM_024664]                       | 0.66 | 11.67 | 6.05  | 0        | 0.02 |
| A_23_P89755  | RNF138       | NM_016271    | ref Homo sapiens ring finger protein 138 (RNF138), transcript variant 1, mRNA [NM_016271]                                   | 0.66 | 12.97 | 4.61  | 0        | 0.05 |
| A_23_P398836 | TXNDC16      | NM_020784    | ref Homo sapiens thioredoxin domain containing 16 (TXNDC16), mRNA [NM_020784]                                               | 0.66 | 9.02  | 7.85  | 2.04E-05 | 0.01 |
| A_32_P164522 | FAM33A       | NM_182620    | family with sequence similarity 33, member A (FAM33A), transcript variant 1, mRNA [NM_182620]                               | 0.66 | 10.7  | 6.21  | 0        | 0.02 |
| A_23_P433369 | HEATR5A      | NM_015473    | ref Homo sapiens HEAT repeat containing 5A (HEATR5A), mRNA [NM_015473]                                                      | 0.66 | 7.62  | 6.23  | 0        | 0.02 |
| A_23_P82738  | RAD54B       | NM_012415    | ref Homo sapiens RAD54 homolog B (S. cerevisiae) (RAD54B), mRNA [NM_012415]                                                 | 0.66 | 9.18  | 9.4   | 4.46E-06 | 0.01 |
| A_24_P477102 | A_24_P477102 | A_24_P477102 | Unknown                                                                                                                     | 0.66 | 8.78  | 4.78  | 0        | 0.04 |
| A_24_P200162 | HIGD1A       | NM_014056    | ref Homo sapiens HIG1 domain family, member 1A (HIGD1A), transcript variant 3, mRNA                                         | 0.65 | 14.04 | 4.89  | 0        | 0.04 |
| A_23_P82738  | RAD54B       | NM_012415    | ref Homo sapiens RAD54 homolog B (S. cerevisiae) (RAD54B), mRNA [NM_012415]                                                 | 0.65 | 9.56  | 10.51 | 1.70E-06 | 0.01 |

|              |              |                |                                                                                                                                                                                                 |      |       |      |          |      |
|--------------|--------------|----------------|-------------------------------------------------------------------------------------------------------------------------------------------------------------------------------------------------|------|-------|------|----------|------|
| A_23_P77079  | MYEF2        | NM_016132      | ref Homo sapiens myelin expression factor 2 (MYEF2), mRNA [NM_016132]                                                                                                                           | 0.65 | 6.81  | 5.63 | 0        | 0.03 |
| A_23_P68198  | SH3YL1       | NM_015677      | ref Homo sapiens SH3 domain containing, Ysc84-like 1 (S. cerevisiae) (SH3YL1), mRNA [NM_015677]                                                                                                 | 0.65 | 8.47  | 5.01 | 0        | 0.04 |
| A_24_P281175 | A_24_P281175 | A_24_P281175   | Unknown                                                                                                                                                                                         | 0.65 | 8.08  | 6.13 | 0        | 0.02 |
| A_24_P304636 | RPS6KA5      | NM_004755      | ref Homo sapiens ribosomal protein S6 kinase, 90kDa, polypeptide 5 (RPS6KA5), transcript variant 1, mRNA [NM_004755]                                                                            | 0.65 | 8.16  | 4.96 | 0        | 0.04 |
| A_24_P187218 | PCDH9        | NM_020403      | ref Homo sapiens protocadherin 9 (PCDH9), transcript variant 2, mRNA [NM_020403]                                                                                                                | 0.65 | 5.91  | 4.91 | 0        | 0.04 |
| A_24_P236445 | DYNC1L12     | NM_006141      | ref Homo sapiens dynein, cytoplasmic 1, light intermediate chain 2 (DYNC1L12), mRNA [NM_006141]                                                                                                 | 0.64 | 8.91  | 5.58 | 0        | 0.03 |
| A_23_P87556  | CPNE8        | NM_153634      | ref Homo sapiens copine VIII (CPNE8), mRNA [NM_153634]                                                                                                                                          | 0.64 | 8.14  | 5.8  | 0        | 0.03 |
| A_24_P268196 | LZIC         | ENST0000037223 | ens Protein LZIC (Leucine zipper and ICAT homologous domain-containing protein) (Leucine zipper and CTNNBIP1 domain-containing protein). [Source:Uniprot/SwissProt;Acc:Q8WZA0] [ENST0000037223] | 0.64 | 8.92  | 5.1  | 0        | 0.04 |
| A_24_P684186 | LOC647121    | NR_003955      | ref Homo sapiens embigin homolog (mouse) pseudogene (LOC647121) on chromosome 1 [NR_003955]                                                                                                     | 0.64 | 10.75 | 5.06 | 0        | 0.04 |
| A_23_P25403  | HCFC2        | NM_013320      | ref Homo sapiens host cell factor C2 (HCFC2), mRNA [NM_013320]                                                                                                                                  | 0.64 | 9.57  | 6.96 | 5.41E-05 | 0.02 |
| A_24_P676259 | A_24_P676259 | A_24_P676259   | Unknown                                                                                                                                                                                         | 0.64 | 6.04  | 7.35 | 3.48E-05 | 0.02 |
| A_24_P58381  | CHD7         | NM_017780      | ref Homo sapiens chromodomain helicase DNA binding protein 7 (CHD7), mRNA [NM_017780]                                                                                                           | 0.64 | 12.42 | 5.1  | 0        | 0.04 |
| A_24_P409219 | CCDC132      | NM_017667      | ref Homo sapiens coiled-coil domain containing 132 (CCDC132), transcript variant 1, mRNA [NM_017667]                                                                                            | 0.64 | 8.04  | 5.03 | 0        | 0.04 |

|              |              |              |                                                                                                                                       |      |       |      |          |      |
|--------------|--------------|--------------|---------------------------------------------------------------------------------------------------------------------------------------|------|-------|------|----------|------|
| A_23_P400580 | FNIP2        | NM_020840    | ref Homo sapiens folliculin interacting protein 2 (FNIP2), mRNA [NM_020840]                                                           | 0.64 | 9.17  | 6.02 | 0        | 0.02 |
| A_32_P155043 | A_32_P155043 | A_32_P155043 | Unknown                                                                                                                               | 0.64 | 7.35  | 4.89 | 0        | 0.04 |
| A_24_P803885 | LOC149134    | AK022825     | gb Homo sapiens cDNA FLJ12763 fis, clone NT2RP2001450. [AK022825]                                                                     | 0.64 | 7.99  | 5.35 | 0        | 0.03 |
| A_24_P112087 | ASF1A        | NM_014034    | ref Homo sapiens ASF1 anti-silencing function 1 homolog A (S. cerevisiae) (ASF1A), mRNA [NM_014034]                                   | 0.64 | 8.52  | 5.37 | 0        | 0.03 |
| A_32_P42780  | ZNF271       | NM_001112663 | ref Homo sapiens zinc finger protein 271 (ZNF271), transcript variant 1, mRNA [NM_001112663]                                          | 0.64 | 8.12  | 5.32 | 0        | 0.03 |
| A_32_P74901  | A_32_P74901  | A_32_P74901  | Unknown                                                                                                                               | 0.64 | 7.41  | 4.97 | 0        | 0.04 |
| A_24_P398130 | USP6NL       | NM_001080491 | ref Homo sapiens USP6 N-terminal like (USP6NL), mRNA [NM_001080491]                                                                   | 0.64 | 9.47  | 6.16 | 0        | 0.02 |
| A_24_P450372 | L40520       | L40520       | gb Homo sapiens (clone DR3) mRNA fragment. [L40520]                                                                                   | 0.64 | 7.41  | 4.51 | 0        | 0.05 |
| A_23_P70007  | HMMR         | NM_012484    | ref Homo sapiens hyaluronan-mediated motility receptor (RHAMM) (HMMR), transcript variant 1, mRNA [NM_012484]                         | 0.63 | 13.24 | 5.21 | 0        | 0.04 |
| A_23_P171385 | PHF6         | NM_032335    | ref Homo sapiens PHD finger protein 6 (PHF6), transcript variant 3, mRNA [NM_032335]                                                  | 0.63 | 7.76  | 5.25 | 0        | 0.04 |
| A_24_P766204 | MAP3K1       | NM_005921    | ref Homo sapiens mitogen-activated protein kinase kinase kinase 1 (MAP3K1), mRNA [NM_005921]                                          | 0.63 | 8.43  | 6.64 | 7.83E-05 | 0.02 |
| A_24_P28524  | DBT          | NM_001918    | ref Homo sapiens dihydrolipoamide branched chain transacylase E2 (DBT), nuclear gene encoding mitochondrial protein, mRNA [NM_001918] | 0.63 | 7.34  | 6.59 | 8.34E-05 | 0.02 |
| A_23_P147199 | ZNF271       | NM_006629    | ref Homo sapiens zinc finger protein 271 (ZNF271), transcript variant 2, mRNA [NM_006629]                                             | 0.63 | 8.86  | 5.59 | 0        | 0.03 |
| A_23_P251421 | CDCA7        | NM_031942    | ref Homo sapiens cell division cycle associated 7 (CDCA7), transcript variant 1, mRNA [NM_031942]                                     | 0.63 | 12.81 | 5.06 | 0        | 0.04 |
| A_23_P216071 | A_23_P216071 | A_23_P216071 | Unknown                                                                                                                               | 0.63 | 8.41  | 5.87 | 0        | 0.03 |

|              |          |              |                                                                                                                                |      |       |       |          |      |
|--------------|----------|--------------|--------------------------------------------------------------------------------------------------------------------------------|------|-------|-------|----------|------|
| A_23_P82738  | RAD54B   | NM_012415    | ref Homo sapiens RAD54 homolog B (S. cerevisiae) (RAD54B), mRNA [NM_012415]                                                    | 0.63 | 9.57  | 10.28 | 2.07E-06 | 0.01 |
| A_23_P142918 | FLJ38973 | NM_153689    | ref Homo sapiens hypothetical protein FLJ38973 (FLJ38973), mRNA [NM_153689]                                                    | 0.63 | 8.21  | 4.72  | 0        | 0.04 |
| A_23_P92842  | SAR1B    | NM_001033503 | ref Homo sapiens SAR1 gene homolog B (S. cerevisiae) (SAR1B), transcript variant 1, mRNA [NM_001033503]                        | 0.63 | 11.32 | 6.13  | 0        | 0.02 |
| A_23_P151459 | MYCBP2   | NM_015057    | ref Homo sapiens MYC binding protein 2 (MYCBP2), mRNA [NM_015057]                                                              | 0.63 | 11.3  | 4.53  | 0        | 0.05 |
| A_24_P184769 | WDR20    | NM_181291    | ref Homo sapiens WD repeat domain 20 (WDR20), transcript variant 1, mRNA [NM_181291]                                           | 0.62 | 9.11  | 7.14  | 4.39E-05 | 0.02 |
| A_23_P82738  | RAD54B   | NM_012415    | ref Homo sapiens RAD54 homolog B (S. cerevisiae) (RAD54B), mRNA [NM_012415]                                                    | 0.62 | 9.62  | 9.95  | 2.74E-06 | 0.01 |
| A_23_P157268 | CLDN12   | NM_012129    | ref Homo sapiens claudin 12 (CLDN12), mRNA [NM_012129]                                                                         | 0.62 | 9.17  | 5.46  | 0        | 0.03 |
| A_23_P370635 | MBOAT2   | NM_138799    | ref Homo sapiens membrane bound O-acyltransferase domain containing 2 (MBOAT2), mRNA [NM_138799]                               | 0.62 | 9.93  | 7.67  | 2.46E-05 | 0.01 |
| A_23_P82738  | RAD54B   | NM_012415    | ref Homo sapiens RAD54 homolog B (S. cerevisiae) (RAD54B), mRNA [NM_012415]                                                    | 0.62 | 9.45  | 9.74  | 3.28E-06 | 0.01 |
| A_24_P95029  | TAX1BP1  | NM_006024    | ref Homo sapiens Tax1 (human T-cell leukemia virus type I) binding protein 1 (TAX1BP1), transcript variant 1, mRNA [NM_006024] | 0.62 | 13.84 | 4.59  | 0        | 0.05 |
| A_23_P16798  | PFN4     | NM_199346    | ref Homo sapiens profilin family, member 4 (PFN4), mRNA [NM_199346]                                                            | 0.62 | 6.83  | 6.08  | 0        | 0.02 |
| A_23_P349310 | TNRC6A   | NM_014494    | ref Homo sapiens trinucleotide repeat containing 6A (TNRC6A), mRNA [NM_014494]                                                 | 0.62 | 9.99  | 4.73  | 0        | 0.04 |
| A_24_P400507 | C3orf64  | NM_173654    | ref Homo sapiens chromosome 3 open reading frame 64 (C3orf64), mRNA [NM_173654]                                                | 0.62 | 6.79  | 4.98  | 0        | 0.04 |
| A_24_P114255 | MBOAT2   | NM_138799    | ref Homo sapiens membrane bound O-acyltransferase domain containing 2 (MBOAT2), mRNA [NM_138799]                               | 0.62 | 6.49  | 6.18  | 0        | 0.02 |



|              |           |              |                                                                                                                                                                                             |      |       |      |          |      |
|--------------|-----------|--------------|---------------------------------------------------------------------------------------------------------------------------------------------------------------------------------------------|------|-------|------|----------|------|
| A_23_P99292  | RAD51AP1  | NM_006479    | ref Homo sapiens<br>RAD51 associated<br>protein 1<br>(RAD51AP1),<br>mRNA<br>[NM_006479]                                                                                                     | 0.62 | 11.39 | 6.38 | 0        | 0.02 |
| A_24_P767901 | LOC643014 | XR_018450    | gb PREDICTED:<br>Homo sapiens<br>misc_RNA<br>(LOC643014),<br>miscRNA<br>[XR_018450]                                                                                                         | 0.62 | 8.98  | 4.83 | 0        | 0.04 |
| A_23_P82738  | RAD54B    | NM_012415    | ref Homo sapiens<br>RAD54 homolog B<br>(S. cerevisiae)<br>(RAD54B), mRNA<br>[NM_012415]                                                                                                     | 0.62 | 9.4   | 9.05 | 6.14E-06 | 0.01 |
| A_32_P1445   | PTPN2     | NM_080423    | ref Homo sapiens<br>protein tyrosine<br>phosphatase, non-<br>receptor type 2<br>(PTPN2), transcript<br>variant 3, mRNA<br>[NM_080423]                                                       | 0.61 | 9.85  | 4.63 | 0        | 0.05 |
| A_23_P88710  | TMEM87A   | NM_015497    | ref Homo sapiens<br>transmembrane<br>protein 87A<br>(TMEM87A),<br>transcript variant 1,<br>mRNA<br>[NM_015497]                                                                              | 0.61 | 13.36 | 8.52 | 1.03E-05 | 0.01 |
| A_23_P40072  | MTIF2     | NM_001005369 | ref Homo sapiens<br>mitochondrial<br>translational<br>initiation factor 2<br>(MTIF2), nuclear<br>gene encoding<br>mitochondrial<br>protein, transcript<br>variant 1, mRNA<br>[NM_001005369] | 0.61 | 11.97 | 4.48 | 0        | 0.05 |
| A_23_P30377  | DDX46     | NM_014829    | ref Homo sapiens<br>DEAD (Asp-Glu-Ala-<br>Asp) box<br>polypeptide 46<br>(DDX46), mRNA<br>[NM_014829]                                                                                        | 0.61 | 11.4  | 6.15 | 0        | 0.02 |
| A_23_P82738  | RAD54B    | NM_012415    | ref Homo sapiens<br>RAD54 homolog B<br>(S. cerevisiae)<br>(RAD54B), mRNA<br>[NM_012415]                                                                                                     | 0.61 | 9.45  | 8.56 | 9.84E-06 | 0.01 |
| A_23_P134078 | CDYL      | NM_170752    | ref Homo sapiens<br>chromodomain<br>protein, Y-like<br>(CDYL), transcript<br>variant 3, mRNA<br>[NM_170752]                                                                                 | 0.61 | 10.9  | 5.3  | 0        | 0.03 |
| A_24_P525877 | AK021840  | AK021840     | gb Homo sapiens<br>cDNA FLJ11778 fis,<br>clone<br>HEMBA1005911.<br>[AK021840]                                                                                                               | 0.61 | 5.36  | 4.68 | 0        | 0.05 |
| A_23_P82738  | RAD54B    | NM_012415    | ref Homo sapiens<br>RAD54 homolog B<br>(S. cerevisiae)<br>(RAD54B), mRNA<br>[NM_012415]                                                                                                     | 0.61 | 9.64  | 9.18 | 5.48E-06 | 0.01 |
| A_24_P171549 | CDCA7     | NM_031942    | ref Homo sapiens<br>cell division cycle<br>associated 7<br>(CDCA7), transcript<br>variant 1, mRNA<br>[NM_031942]                                                                            | 0.61 | 9.88  | 4.46 | 0        | 0.05 |

|              |               |                 |                                                                                                                                                                                                                                                                 |      |       |      |          |      |
|--------------|---------------|-----------------|-----------------------------------------------------------------------------------------------------------------------------------------------------------------------------------------------------------------------------------------------------------------|------|-------|------|----------|------|
| A_23_P207981 | SOCS6         | NM_004232       | ref Homo sapiens suppressor of cytokine signaling 6 (SOCS6), mRNA [NM_004232]                                                                                                                                                                                   | 0.61 | 8.68  | 6.03 | 0        | 0.02 |
| A_23_P144684 | ANKRD32       | NM_032290       | ref Homo sapiens ankyrin repeat domain 32 (ANKRD32), mRNA [NM_032290]                                                                                                                                                                                           | 0.61 | 10.19 | 5.81 | 0        | 0.03 |
| A_23_P116980 | TULP3         | AF045583        | gb Homo sapiens tubby like protein 3 (TULP3) mRNA, complete cds. [AF045583]                                                                                                                                                                                     | 0.6  | 6.39  | 5.11 | 0        | 0.04 |
| A_24_P937855 | RP5-1000E10.4 | NM_001102396    | ref Homo sapiens suppressor of IKK epsilon (SIKE), transcript variant 1, mRNA [NM_001102396]                                                                                                                                                                    | 0.6  | 8.75  | 4.55 | 0        | 0.05 |
| A_24_P217489 | GLRB          | NM_000824       | ref Homo sapiens glycine receptor, beta (GLRB), mRNA [NM_000824]                                                                                                                                                                                                | 0.6  | 6.89  | 6.7  | 7.27E-05 | 0.02 |
| A_32_P57140  | JMJD1C        | NM_032776       | ref Homo sapiens jumonji domain containing 1C (JMJD1C), transcript variant 1, mRNA [NM_032776]                                                                                                                                                                  | 0.6  | 7.81  | 5.25 | 0        | 0.04 |
| A_32_P228183 | LOC100127983  | XM_001722571    | gb PREDICTED: Homo sapiens hypothetical protein LOC100127983 (LOC100127983), mRNA [XM_001722571]                                                                                                                                                                | 0.6  | 7.21  | 5.1  | 0        | 0.04 |
| A_23_P39050  | ZNF823        | NM_001080493    | ref Homo sapiens zinc finger protein 823 (ZNF823), mRNA [NM_001080493]                                                                                                                                                                                          | 0.6  | 8.3   | 6.05 | 0        | 0.02 |
| A_32_P186027 | ANP32A        | ENST00000267918 | ens Acidic leucine-rich nuclear phosphoprotein 32 family member A (Potent heat-stable protein phosphatase 2A inhibitor 1 PP2A) (Acidic nuclear phosphoprotein pp32) (Leucine-rich acidic nuclear protein) (Lanp) (Putative HLA-DR-associated protein 1) (PHAP1) | 0.6  | 12.73 | 5.37 | 0        | 0.03 |
| A_23_P142560 | ZEB2          | NM_014795       | ref Homo sapiens zinc finger E-box binding homeobox 2 (ZEB2), mRNA [NM_014795]                                                                                                                                                                                  | 0.6  | 12.43 | 7.42 | 3.21E-05 | 0.02 |
| A_23_P120644 | A_23_P120644  | A_23_P120644    | Unknown                                                                                                                                                                                                                                                         | 0.6  | 13.35 | 5.11 | 0        | 0.04 |
| A_24_P128880 | TBL1XR1       | NM_024665       | ref Homo sapiens transducin (beta)-like 1 X-linked receptor 1 (TBL1XR1), mRNA [NM_024665]                                                                                                                                                                       | 0.6  | 11.42 | 4.6  | 0        | 0.05 |

|              |            |              |                                                                                                                                             |     |       |      |          |      |
|--------------|------------|--------------|---------------------------------------------------------------------------------------------------------------------------------------------|-----|-------|------|----------|------|
| A_24_P294124 | SERTAD2    | NM_014755    | ref Homo sapiens SERTA domain containing 2 (SERTAD2), mRNA [NM_014755]                                                                      | 0.6 | 10.46 | 5.79 | 0        | 0.03 |
| A_23_P43071  | MTERFD1    | NM_015942    | ref Homo sapiens MTERF domain containing 1 (MTERFD1), mRNA [NM_015942]                                                                      | 0.6 | 11.61 | 6.11 | 0        | 0.02 |
| A_32_P233304 | LIN9       | NM_173083    | ref Homo sapiens lin-9 homolog (C. elegans) (LIN9), mRNA [NM_173083]                                                                        | 0.6 | 11.78 | 4.82 | 0        | 0.04 |
| A_24_P174775 | THC2666103 | THC2666103   | Unknown                                                                                                                                     | 0.6 | 7.32  | 7.37 | 3.41E-05 | 0.02 |
| A_23_P201918 | ABCB10     | NM_012089    | ATP-binding cassette, sub-family B (MDR/TAP), member 10 (ABCB10), nuclear gene encoding mitochondrial protein, mRNA [NM_012089]             | 0.6 | 11.15 | 4.46 | 0        | 0.05 |
| A_23_P105747 | APPL2      | NM_018171    | ref Homo sapiens adaptor protein, phosphotyrosine interaction, PH domain and leucine zipper containing 2 (APPL2), mRNA [NM_018171]          | 0.6 | 7.67  | 5.46 | 0        | 0.03 |
| A_24_P329635 | TSC1       | NM_000368    | ref Homo sapiens tuberous sclerosis 1 (TSC1), transcript variant 1, mRNA [NM_000368]                                                        | 0.6 | 10.44 | 4.5  | 0        | 0.05 |
| A_24_P255314 | SRP14P1    | NR_003273    | ref Homo sapiens signal recognition particle 14kDa (homologous Alu RNA binding protein) pseudogene 1 (SRP14P1) on chromosome 12 [NR_003273] | 0.6 | 13.69 | 4.51 | 0        | 0.05 |
| A_24_P32411  | CSPP1      | NM_001077204 | ref Homo sapiens centrosome and spindle pole associated protein 1 (CSPP1), transcript variant 1, mRNA [NM_001077204]                        | 0.6 | 6     | 4.7  | 0        | 0.05 |
| A_32_P183218 | ZNF367     | AK091289     | gb Homo sapiens cDNA FLJ33970 fis, clone DFNES2001564. [AK091289]                                                                           | 0.6 | 7.94  | 5.26 | 0        | 0.04 |
| A_23_P124427 | NEK1       | NM_012224    | ref Homo sapiens NIMA (never in mitosis gene a)-related kinase 1 (NEK1), mRNA [NM_012224]                                                   | 0.6 | 7.31  | 5.06 | 0        | 0.04 |
| A_32_P395879 | C9orf93    | NM_173550    | ref Homo sapiens chromosome 9 open reading frame 93 (C9orf93), mRNA [NM_173550]                                                             | 0.6 | 5.36  | 6.64 | 7.86E-05 | 0.02 |
| A_24_P323815 | MYCBP2     | NM_015057    | ref Homo sapiens MYC binding protein 2 (MYCBP2), mRNA [NM_015057]                                                                           | 0.6 | 9.15  | 4.65 | 0        | 0.05 |

| A_24_P919399      | ATP10D    | NM_020453      | ref Homo sapiens ATPase, class V, type 10D (ATP10D), mRNA [NM_020453]                                       | 0.6   | 6.66    | 6.06   | 0        | 0.02      |
|-------------------|-----------|----------------|-------------------------------------------------------------------------------------------------------------|-------|---------|--------|----------|-----------|
| <b>DOWN GENES</b> |           |                |                                                                                                             |       |         |        |          |           |
| ProbeName         | GeneName  | SystematicName | Description                                                                                                 | logFC | AveExpr | t      | P.Value  | adj.P.Val |
| A_23_P44195       | MSI2      | NM_138962      | ref Homo sapiens musashi homolog 2 (Drosophila) (MSI2), transcript variant 1, mRNA [NM_138962]              | -2.04 | 11.19   | -30.99 | 9.14E-11 | 4.11E-06  |
| A_24_P283814      | HSPC152   | NM_016404      | ref Homo sapiens hypothetical protein HSPC152 (HSPC152), mRNA [NM_016404]                                   | -1.89 | 14.94   | -13.08 | 2.47E-07 | 0         |
| A_23_P12992       | HSPC152   | NM_016404      | ref Homo sapiens hypothetical protein HSPC152 (HSPC152), mRNA [NM_016404]                                   | -1.83 | 15.03   | -12.43 | 3.89E-07 | 0         |
| A_23_P369479      | MSI2      | NM_170721      | ref Homo sapiens musashi homolog 2 (Drosophila) (MSI2), transcript variant 2, mRNA [NM_170721]              | -1.46 | 8.79    | -13.76 | 1.56E-07 | 0         |
| A_23_P93348       | LTB       | NM_002341      | ref Homo sapiens lymphotoxin beta (TNF superfamily, member 3) (LTB), transcript variant 1, mRNA [NM_002341] | -1.34 | 12.48   | -5.52  | 0        | 0.03      |
| A_24_P280926      | LOC391358 | XM_372921      | gb PREDICTED: Homo sapiens similar to adrenal gland protein AD-001 (LOC391358), mRNA [XM_372921]            | -1.33 | 13.38   | -18.11 | 1.30E-08 | 0         |
| A_23_P86012       | LAMB3     | NM_001017402   | ref Homo sapiens laminin, beta 3 (LAMB3), transcript variant 2, mRNA [NM_001017402]                         | -1.32 | 11.81   | -4.53  | 0        | 0.05      |
| A_23_P127995      | CLNS1A    | NM_001293      | ref Homo sapiens chloride channel, nucleotide-sensitive, 1A (CLNS1A), mRNA [NM_001293]                      | -1.28 | 14.78   | -13.92 | 1.41E-07 | 0         |
| A_24_P136641      | BC013655  | BC013655       | gb Homo sapiens, clone IMAGE:4152599, mRNA, partial cds. [BC013655]                                         | -1.27 | 10.36   | -8.4   | 1.15E-05 | 0.01      |
| A_23_P117558      | FKBP3     | NM_002013      | ref Homo sapiens FK506 binding protein 3, 25kDa (FKBP3), mRNA [NM_002013]                                   | -1.16 | 12.43   | -6.53  | 8.94E-05 | 0.02      |

|              |           |           |                                                                                                                                                                                                                                                               |       |       |       |          |      |
|--------------|-----------|-----------|---------------------------------------------------------------------------------------------------------------------------------------------------------------------------------------------------------------------------------------------------------------|-------|-------|-------|----------|------|
| A_24_P255914 | XR_019229 | XR_019229 | gb PREDICTED: Homo sapiens similar to Methylosome subunit pICln (Chloride conductance regulatory protein ICln) (ICln) (Chloride channel, nucleotide sensitive 1A) (Chloride ion current inducer protein) (CICI) (Reticulocyte pICln) (LOC650438), mRNA [XR_01 | -1.15 | 10.97 | -12.1 | 4.94E-07 | 0    |
| A_23_P87257  | MRPL17    | NM_022061 | mitochondrial ribosomal protein L17 (MRPL17), nuclear gene encoding mitochondrial protein, mRNA [NM_022061]                                                                                                                                                   | -1.04 | 11.62 | -8.13 | 1.53E-05 | 0.01 |
| A_23_P353014 | CACNA2D4  | NM_172364 | calcium channel, voltage-dependent, alpha 2/delta subunit 4 (CACNA2D4), mRNA [NM_172364]                                                                                                                                                                      | -1.03 | 10.57 | -5.31 | 0        | 0.03 |
| A_23_P58266  | S100P     | NM_005980 | ref Homo sapiens S100 calcium binding protein P (S100P), mRNA [NM_005980]                                                                                                                                                                                     | -1.02 | 12.73 | -4.47 | 0        | 0.05 |
| A_23_P7932   | TREML2    | NM_024807 | ref Homo sapiens triggering receptor expressed on myeloid cells-like 2 (TREML2), mRNA [NM_024807]                                                                                                                                                             | -0.97 | 10.72 | -7.2  | 4.09E-05 | 0.02 |
| A_23_P204751 | ACCN2     | NM_020039 | ref Homo sapiens amiloride-sensitive cation channel 2, neuronal (ACCN2), transcript variant 1, mRNA [NM_020039]                                                                                                                                               | -0.96 | 9.11  | -7.97 | 1.79E-05 | 0.01 |
| A_23_P12896  | FANCF     | NM_022725 | ref Homo sapiens Fanconi anemia, complementation group F (FANCF), mRNA [NM_022725]                                                                                                                                                                            | -0.94 | 10.23 | -5.42 | 0        | 0.03 |
| A_23_P107963 | FUT1      | NM_000148 | fucosyltransferase 1 (galactoside 2-alpha-L-fucosyltransferase, H blood group) (FUT1), mRNA [NM_000148]                                                                                                                                                       | -0.94 | 8.65  | -5.21 | 0        | 0.04 |
| A_23_P250629 | PSMB8     | NM_004159 | ref Homo sapiens proteasome (prosome, macropain) subunit, beta type, 8 (large multifunctional peptidase 7) (PSMB8), transcript variant 1, mRNA [NM_004159]                                                                                                    | -0.9  | 12.53 | -7.59 | 2.67E-05 | 0.01 |
| A_23_P37892  | GPT2      | NM_133443 | ref Homo sapiens glutamic pyruvate transaminase (alanine aminotransferase) 2 (GPT2), mRNA [NM_133443]                                                                                                                                                         | -0.89 | 10.21 | -5.52 | 0        | 0.03 |

|              |         |           |                                                                                                     |       |       |       |          |      |
|--------------|---------|-----------|-----------------------------------------------------------------------------------------------------|-------|-------|-------|----------|------|
| A_23_P166408 | OSM     | NM_020530 | ref Homo sapiens oncostatin M (OSM), mRNA [NM_020530]                                               | -0.89 | 11.13 | -6.09 | 0        | 0.02 |
| A_23_P113212 | TMEM45A | NM_018004 | ref Homo sapiens transmembrane protein 45A (TMEM45A), mRNA [NM_018004]                              | -0.86 | 10.79 | -4.67 | 0        | 0.05 |
| A_23_P114783 | PARP1   | NM_001618 | ref Homo sapiens poly (ADP-ribose) polymerase family, member 1 (PARP1), mRNA [NM_001618]            | -0.85 | 14.92 | -9.29 | 4.93E-06 | 0.01 |
| A_23_P114783 | PARP1   | NM_001618 | ref Homo sapiens poly (ADP-ribose) polymerase family, member 1 (PARP1), mRNA [NM_001618]            | -0.85 | 14.9  | -8.29 | 1.29E-05 | 0.01 |
| A_23_P114783 | PARP1   | NM_001618 | ref Homo sapiens poly (ADP-ribose) polymerase family, member 1 (PARP1), mRNA [NM_001618]            | -0.85 | 14.87 | -9.09 | 5.92E-06 | 0.01 |
| A_23_P114783 | PARP1   | NM_001618 | ref Homo sapiens poly (ADP-ribose) polymerase family, member 1 (PARP1), mRNA [NM_001618]            | -0.85 | 14.68 | -8.96 | 6.70E-06 | 0.01 |
| A_23_P114783 | PARP1   | NM_001618 | ref Homo sapiens poly (ADP-ribose) polymerase family, member 1 (PARP1), mRNA [NM_001618]            | -0.84 | 15.04 | -9.73 | 3.31E-06 | 0.01 |
| A_23_P114783 | PARP1   | NM_001618 | ref Homo sapiens poly (ADP-ribose) polymerase family, member 1 (PARP1), mRNA [NM_001618]            | -0.84 | 14.59 | -9.24 | 5.18E-06 | 0.01 |
| A_23_P14537  | TMED10  | NM_006827 | ref Homo sapiens transmembrane emp24-like trafficking protein 10 (yeast) (TMED10), mRNA [NM_006827] | -0.84 | 13.47 | -6.16 | 0        | 0.02 |
| A_23_P114783 | PARP1   | NM_001618 | ref Homo sapiens poly (ADP-ribose) polymerase family, member 1 (PARP1), mRNA [NM_001618]            | -0.83 | 14.94 | -8.85 | 7.46E-06 | 0.01 |
| A_23_P114783 | PARP1   | NM_001618 | ref Homo sapiens poly (ADP-ribose) polymerase family, member 1 (PARP1), mRNA [NM_001618]            | -0.83 | 15.1  | -8.28 | 1.30E-05 | 0.01 |
| A_23_P114783 | PARP1   | NM_001618 | ref Homo sapiens poly (ADP-ribose) polymerase family, member 1 (PARP1), mRNA [NM_001618]            | -0.83 | 15.06 | -8.37 | 1.19E-05 | 0.01 |
| A_23_P114783 | PARP1   | NM_001618 | ref Homo sapiens poly (ADP-ribose) polymerase family, member 1 (PARP1), mRNA [NM_001618]            | -0.83 | 14.91 | -8.34 | 1.23E-05 | 0.01 |
| A_23_P37702  | TPSAB1  | NM_003294 | ref Homo sapiens tryptase alpha/beta 1 (TPSAB1), mRNA [NM_003294]                                   | -0.83 | 9.59  | -4.91 | 0        | 0.04 |

|              |                 |                 |                                                                                                                                                                  |       |       |       |          |      |
|--------------|-----------------|-----------------|------------------------------------------------------------------------------------------------------------------------------------------------------------------|-------|-------|-------|----------|------|
| A_24_P671842 | THC2762149      | THC2762149      | thc BC037545 poly(ADP-riboseyl)transferase {Homo sapiens} (exp=-1; wgp=0; cg=0), partial (24%) [THC2762149]                                                      | -0.82 | 12.81 | -8.53 | 1.02E-05 | 0.01 |
| A_23_P140207 | PCK2            | NM_004563       | ref Homo sapiens phosphoenolpyruvate carboxykinase 2 (mitochondrial) (PCK2), nuclear gene encoding mitochondrial protein, transcript variant 1, mRNA [NM_004563] | -0.82 | 14.94 | -7.3  | 3.68E-05 | 0.02 |
| A_23_P17430  | RBM38           | NM_017495       | ref Homo sapiens RNA binding motif protein 38 (RBM38), transcript variant 1, mRNA [NM_017495]                                                                    | -0.81 | 11.26 | -5.15 | 0        | 0.04 |
| A_23_P42335  | FANCE           | NM_021922       | ref Homo sapiens Fanconi anemia, complementation group E (FANCE), mRNA [NM_021922]                                                                               | -0.8  | 13.95 | -6.59 | 8.33E-05 | 0.02 |
| A_24_P800629 | TMED10P         | NR_002807       | ref Homo sapiens transmembrane emp24-like trafficking protein 10 (yeast) pseudogene (TMED10P) on chromosome 8 [NR_002807]                                        | -0.8  | 10.72 | -6.57 | 8.56E-05 | 0.02 |
| A_23_P104692 | PELI3           | NM_145065       | ref Homo sapiens pellino homolog 3 (Drosophila) (PELI3), transcript variant 1, mRNA [NM_145065]                                                                  | -0.79 | 10.28 | -4.73 | 0        | 0.04 |
| A_24_P236956 | RAB3D           | BC007960        | gb Homo sapiens RAB3D, member RAS oncogene family, mRNA (cDNA clone IMAGE:4301650), partial cds. [BC007960]                                                      | -0.78 | 11.23 | -8.23 | 1.37E-05 | 0.01 |
| A_23_P115862 | COMTD1          | NM_144589       | ref Homo sapiens catechol-O-methyltransferase domain containing 1 (COMTD1), mRNA [NM_144589]                                                                     | -0.78 | 11.46 | -5.01 | 0        | 0.04 |
| A_23_P110879 | TRAF3IP2        | NM_147686       | ref Homo sapiens TRAF3 interacting protein 2 (TRAF3IP2), transcript variant 2, mRNA                                                                              | -0.78 | 8.86  | -4.64 | 0        | 0.05 |
| A_23_P166336 | ENST00000249122 | ENST00000249122 | gb Homo sapiens mRNA; cDNA DKFZp434N035 (from clone DKFZp434N035). [AL136879]                                                                                    | -0.77 | 10.14 | -5.41 | 0        | 0.03 |
| A_24_P135856 | RHD             | NM_016124       | ref Homo sapiens Rh blood group, D antigen (RHD), mRNA [NM_016124]                                                                                               | -0.77 | 8.56  | -5.4  | 0        | 0.03 |

|              |           |           |                                                                                                                                                                  |       |       |       |          |      |
|--------------|-----------|-----------|------------------------------------------------------------------------------------------------------------------------------------------------------------------|-------|-------|-------|----------|------|
| A_23_P23765  | ITGB3BP   | NM_014288 | ref Homo sapiens integrin beta 3 binding protein (beta3-endonexin) (ITGB3BP), mRNA [NM_014288]                                                                   | -0.77 | 10.28 | -7.1  | 4.59E-05 | 0.02 |
| A_23_P148162 | ADI1      | NM_018269 | ref Homo sapiens acireductone dioxygenase 1 (ADI1), mRNA [NM_018269]                                                                                             | -0.77 | 11.23 | -6.35 | 0        | 0.02 |
| A_23_P128817 | PCK2      | NM_004563 | ref Homo sapiens phosphoenolpyruvate carboxykinase 2 (mitochondrial) (PCK2), nuclear gene encoding mitochondrial protein, transcript variant 1, mRNA [NM_004563] | -0.77 | 10.69 | -7.56 | 2.77E-05 | 0.01 |
| A_24_P23995  | RNF187    | BC012758  | gb Homo sapiens ring finger protein 187, mRNA (cDNA clone IMAGE:3633225), partial cds. [BC012758]                                                                | -0.76 | 11.2  | -6.06 | 0        | 0.02 |
| A_24_P218265 | TNFRSF10B | NM_003842 | tumor necrosis factor receptor superfamily, member 10b (TNFRSF10B), transcript variant 1, mRNA [NM_003842]                                                       | -0.76 | 12.91 | -6.14 | 0        | 0.02 |
| A_23_P52676  | CATSPER1  | NM_053054 | ref Homo sapiens cation channel, sperm associated 1 (CATSPER1), mRNA [NM_053054]                                                                                 | -0.76 | 10.37 | -5.32 | 0        | 0.03 |
| A_23_P23765  | ITGB3BP   | NM_014288 | ref Homo sapiens integrin beta 3 binding protein (beta3-endonexin) (ITGB3BP), mRNA [NM_014288]                                                                   | -0.75 | 10.26 | -6.95 | 5.43E-05 | 0.02 |
| A_32_P52911  | ADI1      | NM_018269 | ref Homo sapiens acireductone dioxygenase 1 (ADI1), mRNA [NM_018269]                                                                                             | -0.75 | 10.87 | -6.76 | 6.81E-05 | 0.02 |
| A_23_P90359  | NRTN      | NM_004558 | neurturin (NRTN), mRNA [NM_004558]                                                                                                                               | -0.75 | 7.15  | -6.8  | 6.49E-05 | 0.02 |
| A_23_P23765  | ITGB3BP   | NM_014288 | ref Homo sapiens integrin beta 3 binding protein (beta3-endonexin) (ITGB3BP), mRNA [NM_014288]                                                                   | -0.75 | 10.25 | -7.05 | 4.84E-05 | 0.02 |
| A_23_P253561 | C20orf121 | NM_024331 | ref Homo sapiens chromosome 20 open reading frame 121 (C20orf121), transcript variant 1, mRNA [NM_024331]                                                        | -0.74 | 11.67 | -5.93 | 0        | 0.03 |
| A_23_P23765  | ITGB3BP   | NM_014288 | ref Homo sapiens integrin beta 3 binding protein (beta3-endonexin) (ITGB3BP), mRNA [NM_014288]                                                                   | -0.74 | 10.34 | -7.44 | 3.15E-05 | 0.02 |



|              |            |            |                                                                                                                                   |       |       |       |          |      |
|--------------|------------|------------|-----------------------------------------------------------------------------------------------------------------------------------|-------|-------|-------|----------|------|
| A_24_P386622 | ARRB1      | NM_004041  | ref Homo sapiens arrestin, beta 1 (ARRB1), transcript variant 1, mRNA [NM_004041]                                                 | -0.74 | 9.25  | -4.45 | 0        | 0.05 |
| A_23_P20437  | TIGD5      | NM_032862  | ref Homo sapiens tigger transposable element derived 5 (TIGD5), mRNA [NM_032862]                                                  | -0.74 | 11.53 | -6.86 | 6.08E-05 | 0.02 |
| A_23_P23765  | ITGB3BP    | NM_014288  | ref Homo sapiens integrin beta 3 binding protein (beta3-endonexin) (ITGB3BP), mRNA [NM_014288]                                    | -0.74 | 10.2  | -7.42 | 3.23E-05 | 0.02 |
| A_23_P145904 | H2AFV      | NM_012412  | ref Homo sapiens H2A histone family, member V (H2AFV), transcript variant 1, mRNA [NM_012412]                                     | -0.74 | 15.51 | -5.03 | 0        | 0.04 |
| A_23_P23765  | ITGB3BP    | NM_014288  | ref Homo sapiens integrin beta 3 binding protein (beta3-endonexin) (ITGB3BP), mRNA [NM_014288]                                    | -0.74 | 10.33 | -7.81 | 2.11E-05 | 0.01 |
| A_23_P95823  | NSMCE1     | NM_145080  | ref Homo sapiens non-SMC element 1 homolog (S. cerevisiae) (NSMCE1), mRNA [NM_145080]                                             | -0.73 | 12.82 | -6.82 | 6.37E-05 | 0.02 |
| A_23_P23765  | ITGB3BP    | NM_014288  | ref Homo sapiens integrin beta 3 binding protein (beta3-endonexin) (ITGB3BP), mRNA [NM_014288]                                    | -0.73 | 10.29 | -7.25 | 3.87E-05 | 0.02 |
| A_23_P148984 | DARS2      | NM_018122  | ref Homo sapiens aspartyl-tRNA synthetase 2, mitochondrial (DARS2), nuclear gene encoding mitochondrial protein, mRNA [NM_018122] | -0.73 | 9.95  | -6.76 | 6.78E-05 | 0.02 |
| A_23_P203702 | THC2707284 | THC2707284 | UniProtKB:Q214U3 Penicillin-binding protein 1C precursor, partial (3%)                                                            | -0.73 | 11.25 | -5.92 | 0        | 0.03 |
| A_23_P124962 | FAM89B     | NM_152832  | family with sequence similarity 89, member B (FAM89B), transcript variant 2, mRNA [NM_152832]                                     | -0.73 | 11.35 | -5.92 | 0        | 0.03 |
| A_23_P23765  | ITGB3BP    | NM_014288  | ref Homo sapiens integrin beta 3 binding protein (beta3-endonexin) (ITGB3BP), mRNA [NM_014288]                                    | -0.73 | 10.05 | -6.74 | 6.96E-05 | 0.02 |
| A_23_P23765  | ITGB3BP    | NM_014288  | ref Homo sapiens integrin beta 3 binding protein (beta3-endonexin) (ITGB3BP), mRNA [NM_014288]                                    | -0.73 | 10.29 | -7.79 | 2.15E-05 | 0.01 |

|              |           |              |                                                                                                                                                                                      |       |       |       |          |      |
|--------------|-----------|--------------|--------------------------------------------------------------------------------------------------------------------------------------------------------------------------------------|-------|-------|-------|----------|------|
| A_23_P23765  | ITGB3BP   | NM_014288    | ref Homo sapiens integrin beta 3 binding protein (beta3-endonexin) (ITGB3BP), mRNA [NM_014288]                                                                                       | -0.72 | 10.17 | -6.67 | 7.57E-05 | 0.02 |
| A_23_P334709 | FKBP9     | NM_007270    | ref Homo sapiens FK506 binding protein 9, 63 kDa (FKBP9), mRNA [NM_007270]                                                                                                           | -0.72 | 12.1  | -5.23 | 0        | 0.04 |
| A_23_P141315 | NLE1      | NM_001014445 | ref Homo sapiens notchless homolog 1 (Drosophila) (NLE1), transcript variant 2, mRNA [NM_001014445]                                                                                  | -0.72 | 12.5  | -4.59 | 0        | 0.05 |
| A_24_P156113 | EHD2      | NM_014601    | ref Homo sapiens EH-domain containing 2 (EHD2), mRNA [NM_014601]                                                                                                                     | -0.71 | 9.93  | -4.64 | 0        | 0.05 |
| A_23_P202881 | FEZ1      | NM_005103    | ref Homo sapiens fasciculation and elongation protein zeta 1 (zygin I) (FEZ1), transcript variant 1, mRNA [NM_005103]                                                                | -0.71 | 11.55 | -5.48 | 0        | 0.03 |
| A_24_P568645 | XR_019461 | XR_019461    | g PREDICTED: Homo sapiens similar to Poly [ADP ribose] polymerase 1 (PARP-1) (ADPRT) (NAD(+)-ADP-ribosyltransferase 1) (Poly[ADP-ribose] synthetase 1) (LOC649459), mRNA [XR_019461] | -0.71 | 12.17 | -6.75 | 6.90E-05 | 0.02 |
| A_23_P360626 | LOC201164 | NM_178836    | ref Homo sapiens similar to CG12314 gene product (LOC201164), mRNA [NM_178836]                                                                                                       | -0.71 | 11.11 | -4.52 | 0        | 0.05 |
| A_23_P116809 | COPZ1     | NM_016057    | ref Homo sapiens coatomer protein complex, subunit zeta 1 (COPZ1), mRNA [NM_016057]                                                                                                  | -0.71 | 10.48 | -8.09 | 1.59E-05 | 0.01 |
| A_23_P362712 | ABHD11    | NM_148912    | ref Homo sapiens abhydrolase domain containing 11 (ABHD11), mRNA [NM_148912]                                                                                                         | -0.7  | 9.68  | -5.09 | 0        | 0.04 |
| A_23_P68851  | KREMEN1   | NM_001039570 | ref Homo sapiens kringle containing transmembrane protein 1 (KREMEN1), transcript variant 3, mRNA [NM_001039570]                                                                     | -0.7  | 10.71 | -6.3  | 0        | 0.02 |
| A_24_P172990 | AARS      | NM_001605    | ref Homo sapiens alanyl-tRNA synthetase (AARS), mRNA [NM_001605]                                                                                                                     | -0.7  | 11.61 | -6.29 | 0        | 0.02 |
| A_23_P171336 | NXF3      | NM_022052    | ref Homo sapiens nuclear RNA export factor 3 (NXF3), mRNA [NM_022052]                                                                                                                | -0.69 | 12.85 | -4.49 | 0        | 0.05 |

|              |              |              |                                                                                                                |       |       |        |          |      |
|--------------|--------------|--------------|----------------------------------------------------------------------------------------------------------------|-------|-------|--------|----------|------|
| A_23_P1043   | C1orf106     | NM_018265    | ref Homo sapiens chromosome 1 open reading frame 106 (C1orf106), mRNA [NM_018265]                              | -0.69 | 9     | -5.66  | 0        | 0.03 |
| A_23_P29684  | VILL         | NM_015873    | villin-like (VILL), mRNA [NM_015873]                                                                           | -0.69 | 9.28  | -5.02  | 0        | 0.04 |
| A_32_P107746 | ENSA         | NM_207042    | ref Homo sapiens endosulfine alpha (ENSA), transcript variant 1, mRNA [NM_207042]                              | -0.69 | 10.85 | -10.46 | 1.78E-06 | 0.01 |
| A_23_P148194 | ADI1         | NM_018269    | ref Homo sapiens acireductone dioxygenase 1 (ADI1), mRNA [NM_018269]                                           | -0.69 | 12.08 | -5.65  | 0        | 0.03 |
| A_23_P16469  | PLAUR        | NM_001005377 | ref Homo sapiens plasminogen activator, urokinase receptor (PLAUR), transcript variant 3, mRNA [NM_001005377]  | -0.68 | 11.08 | -4.97  | 0        | 0.04 |
| A_23_P55998  | SLC1A5       | NM_005628    | ref Homo sapiens solute carrier family 1 (neutral amino acid transporter), member 5 (SLC1A5), mRNA [NM_005628] | -0.68 | 10.9  | -4.97  | 0        | 0.04 |
| A_32_P37592  | SCARNA17     | NR_003003    | ref Homo sapiens small Cajal body-specific RNA 17 (SCARNA17) on chromosome 18 [NR_003003]                      | -0.68 | 10.69 | -5.87  | 0        | 0.03 |
| A_24_P118260 | LOC100128203 | XM_001715724 | ref PREDICTED: Homo sapiens similar to hCG2040272 (LOC100128203), mRNA [XM_001715724]                          | -0.68 | 8.59  | -9.51  | 4.03E-06 | 0.01 |
| A_23_P76882  | CCNB1IP1     | NM_182851    | ref Homo sapiens cyclin B1 interacting protein 1 (CCNB1IP1), transcript variant 3, mRNA                        | -0.68 | 13.41 | -4.52  | 0        | 0.05 |
| A_24_P50759  | TNF          | NM_000594    | ref Homo sapiens tumor necrosis factor (TNF superfamily, member 2) (TNF), mRNA                                 | -0.67 | 8.31  | -4.56  | 0        | 0.05 |
| A_23_P156284 | DBN1         | NM_080881    | ref Homo sapiens drebrin 1 (DBN1), transcript variant 2, mRNA [NM_080881]                                      | -0.67 | 12.68 | -9.5   | 4.09E-06 | 0.01 |
| A_24_P48856  | CBS          | NM_000071    | ref Homo sapiens cystathionine-beta-synthase (CBS), mRNA [NM_000071]                                           | -0.67 | 9.81  | -6.38  | 0        | 0.02 |
| A_24_P50759  | TNF          | NM_000594    | ref Homo sapiens tumor necrosis factor (TNF superfamily, member 2) (TNF), mRNA                                 | -0.67 | 8.3   | -4.71  | 0        | 0.05 |
| A_23_P58747  | N4BP3        | NM_015111    | ref Homo sapiens Nedd4 binding protein 3 (N4BP3), mRNA [NM_015111]                                             | -0.67 | 9.33  | -5.26  | 0        | 0.04 |

|              |          |           |                                                                                                                                            |       |       |       |          |      |
|--------------|----------|-----------|--------------------------------------------------------------------------------------------------------------------------------------------|-------|-------|-------|----------|------|
| A_23_P500433 | CARD9    | NM_052813 | ref Homo sapiens caspase recruitment domain family, member 9 (CARD9), mRNA [NM_052813]                                                     | -0.67 | 11.77 | -6.35 | 0        | 0.02 |
| A_24_P335620 | SLC7A5   | NM_003486 | ref Homo sapiens solute carrier family 7 (cationic amino acid transporter, y+ system), member 5 (SLC7A5), mRNA [NM_003486]                 | -0.66 | 13.39 | -5.7  | 0        | 0.03 |
| A_24_P50759  | TNF      | NM_000594 | ref Homo sapiens tumor necrosis factor (TNF superfamily, member 2) (TNF), mRNA                                                             | -0.66 | 8.49  | -5.05 | 0        | 0.04 |
| A_23_P5831   | HPCAL1   | NM_134421 | ref Homo sapiens hippocalcin-like 1 (HPCAL1), transcript variant 2, mRNA [NM_134421]                                                       | -0.66 | 11.03 | -6.11 | 0        | 0.02 |
| A_23_P100344 | ORC6L    | NM_014321 | ref Homo sapiens origin recognition complex, subunit 6 like (yeast) (ORC6L), mRNA [NM_014321]                                              | -0.66 | 11.69 | -5.05 | 0        | 0.04 |
| A_24_P50759  | TNF      | NM_000594 | ref Homo sapiens tumor necrosis factor (TNF superfamily, member 2) (TNF), mRNA                                                             | -0.66 | 8.37  | -4.8  | 0        | 0.04 |
| A_24_P250499 | C20orf77 | NM_021215 | ref Homo sapiens chromosome 20 open reading frame 77 (C20orf77), mRNA [NM_021215]                                                          | -0.66 | 11.09 | -6.6  | 8.20E-05 | 0.02 |
| A_23_P135015 | RGP1     | BC001725  | gb Homo sapiens RGP1 retrograde golgi transport homolog (S. cerevisiae), mRNA (cDNA clone MGC:755 IMAGE:3533857), complete cds. [BC001725] | -0.65 | 8.07  | -4.89 | 0        | 0.04 |
| A_23_P411296 | CEBPB    | NM_005194 | ref Homo sapiens CCAAT/enhancer binding protein (C/EBP), beta (CEBPB), mRNA [NM_005194]                                                    | -0.65 | 14.6  | -4.5  | 0        | 0.05 |
| A_24_P50759  | TNF      | NM_000594 | ref Homo sapiens tumor necrosis factor (TNF superfamily, member 2) (TNF), mRNA                                                             | -0.65 | 8.52  | -5.1  | 0        | 0.04 |
| A_24_P300777 | ADAM8    | NM_001109 | ref Homo sapiens ADAM metalloproteinase domain 8 (ADAM8), mRNA [NM_001109]                                                                 | -0.65 | 12.88 | -5.87 | 0        | 0.03 |
| A_24_P225616 | RRM2     | NM_001034 | ref Homo sapiens ribonucleotide reductase M2 polypeptide (RRM2), mRNA [NM_001034]                                                          | -0.65 | 11.02 | -6.75 | 6.87E-05 | 0.02 |

|              |           |                |                                                                                                                       |       |       |       |          |      |
|--------------|-----------|----------------|-----------------------------------------------------------------------------------------------------------------------|-------|-------|-------|----------|------|
| A_24_P73738  | RPL13     | ENST0000031528 | protein L13 (Breast basic conserved protein 1). [Source:Uniprot/SwissProt;Acc:P26373] [ENST00000311528]               | -0.65 | 12.75 | -6.59 | 8.34E-05 | 0.02 |
| A_23_P60683  | STK24     | NM_001032296   | reflHomo sapiens serine/threonine kinase 24 (STE20 homolog, yeast) (STK24), transcript variant 2, mRNA [NM_001032296] | -0.65 | 12.39 | -7.74 | 2.29E-05 | 0.01 |
| A_23_P411296 | CEBPB     | NM_005194      | reflHomo sapiens CCAAT/enhancer binding protein (C/EBP), beta (CEBPB), mRNA [NM_005194]                               | -0.65 | 14.41 | -4.66 | 0        | 0.05 |
| A_24_P192914 | AMICA1    | NM_153206      | adhesion molecule, interacts with CXADR antigen 1 (AMICA1), transcript variant 2, mRNA [NM_153206]                    | -0.65 | 9.87  | -5.34 | 0        | 0.03 |
| A_23_P92349  | FGFRL1    | NM_001004356   | reflHomo sapiens fibroblast growth factor receptor-like 1 (FGFRL1), transcript variant 1, mRNA [NM_001004356]         | -0.64 | 8.19  | -7.21 | 4.05E-05 | 0.02 |
| A_24_P195400 | XR_019065 | XR_019065      | Homo sapiens similar to DNA replication complex GINS protein PSF2 (LOC391247), mRNA [XR_019065]                       | -0.64 | 10.41 | -6.19 | 0        | 0.02 |
| A_23_P127964 | PRCP      | NM_199418      | reflHomo sapiens prolylcarboxypeptidase (angiotensinase C) (PRCP), transcript variant 2, mRNA [NM_199418]             | -0.64 | 13.53 | -7.63 | 2.57E-05 | 0.01 |
| A_23_P131676 | CXCR7     | NM_020311      | reflHomo sapiens chemokine (C-X-C motif) receptor 7 (CXCR7), mRNA [NM_020311]                                         | -0.64 | 7.95  | -4.63 | 0        | 0.05 |
| A_23_P411296 | CEBPB     | NM_005194      | reflHomo sapiens CCAAT/enhancer binding protein (C/EBP), beta (CEBPB), mRNA [NM_005194]                               | -0.64 | 14.78 | -4.73 | 0        | 0.04 |
| A_23_P411296 | CEBPB     | NM_005194      | reflHomo sapiens CCAAT/enhancer binding protein (C/EBP), beta (CEBPB), mRNA [NM_005194]                               | -0.64 | 14.43 | -4.64 | 0        | 0.05 |
| A_23_P167674 | F12       | NM_000505      | reflHomo sapiens coagulation factor XII (Hageman factor) (F12), mRNA [NM_000505]                                      | -0.64 | 10.93 | -6.66 | 7.68E-05 | 0.02 |
| A_24_P50759  | TNF       | NM_000594      | reflHomo sapiens tumor necrosis factor (TNF superfamily, member 2) (TNF), mRNA                                        | -0.64 | 8.49  | -4.61 | 0        | 0.05 |

|              |          |           |                                                                                                                |       |       |       |          |      |
|--------------|----------|-----------|----------------------------------------------------------------------------------------------------------------|-------|-------|-------|----------|------|
| A_23_P411296 | CEBPB    | NM_005194 | ref Homo sapiens CCAAT/enhancer binding protein (C/EBP), beta (CEBPB), mRNA [NM_005194]                        | -0.64 | 14.7  | -4.56 | 0        | 0.05 |
| A_24_P50759  | TNF      | NM_000594 | ref Homo sapiens tumor necrosis factor (TNF superfamily, member 2) (TNF), mRNA                                 | -0.64 | 8.33  | -4.52 | 0        | 0.05 |
| A_23_P200901 | ENSA     | NM_004436 | ref Homo sapiens endosulfine alpha (ENSA), transcript variant 3, mRNA [NM_004436]                              | -0.64 | 11.36 | -9.98 | 2.66E-06 | 0.01 |
| A_24_P389959 | COPZ1    | NM_016057 | ref Homo sapiens coatamer protein complex, subunit zeta 1 (COPZ1), mRNA [NM_016057]                            | -0.64 | 12.71 | -5.75 | 0        | 0.03 |
| A_23_P388170 | SLC39A3  | NM_213568 | solute carrier family 39 (zinc transporter), member 3 (SLC39A3), transcript variant 2, mRNA                    | -0.63 | 9.15  | -4.71 | 0        | 0.05 |
| A_23_P411296 | CEBPB    | NM_005194 | ref Homo sapiens CCAAT/enhancer binding protein (C/EBP), beta (CEBPB), mRNA [NM_005194]                        | -0.63 | 14.74 | -4.52 | 0        | 0.05 |
| A_23_P151368 | N6AMT2   | NM_174928 | ref Homo sapiens N6 adenine-specific DNA methyltransferase 2 (putative) (N6AMT2), mRNA [NM_174928]             | -0.63 | 10.21 | -5.02 | 0        | 0.04 |
| A_23_P118246 | GINS2    | NM_016095 | ref Homo sapiens GINS complex subunit 2 (Psf2 homolog) (GINS2), mRNA [NM_016095]                               | -0.63 | 13.06 | -6.03 | 0        | 0.02 |
| A_23_P215819 | ZNF655   | NM_024061 | ref Homo sapiens zinc finger protein 655 (ZNF655), transcript variant 2, mRNA [NM_024061]                      | -0.63 | 10.82 | -4.83 | 0        | 0.04 |
| A_23_P323943 | SLC5A12  | NM_178498 | ref Homo sapiens solute carrier family 5 (sodium/glucose cotransporter), member 12 (SLC5A12), mRNA [NM_178498] | -0.63 | 10.67 | -5.31 | 0        | 0.03 |
| A_24_P583007 | BC039246 | BC039246  | gb Homo sapiens cDNA clone IMAGE:5278517. [BC039246]                                                           | -0.63 | 10.75 | -6.2  | 0        | 0.02 |
| A_23_P78108  | ALDOC    | NM_005165 | ref Homo sapiens aldolase C, fructose bisphosphate (ALDOC), mRNA [NM_005165]                                   | -0.62 | 11.06 | -4.45 | 0        | 0.05 |
| A_23_P207058 | SOCS3    | NM_003955 | ref Homo sapiens suppressor of cytokine signaling 3 (SOCS3), mRNA [NM_003955]                                  | -0.62 | 8.66  | -5.52 | 0        | 0.03 |

|              |            |              |                                                                                                                        |       |       |       |          |      |
|--------------|------------|--------------|------------------------------------------------------------------------------------------------------------------------|-------|-------|-------|----------|------|
| A_24_P50759  | TNF        | NM_000594    | ref Homo sapiens tumor necrosis factor (TNF superfamily, member 2) (TNF), mRNA                                         | -0.62 | 8.31  | -4.52 | 0        | 0.05 |
| A_32_P88349  | CR620599   | CR620599     | gb full-length cDNA clone CSODF021Y114 of Fetal brain of Homo sapiens (human). [CR620599]                              | -0.62 | 11.41 | -5.24 | 0        | 0.04 |
| A_23_P253177 | STK24      | NM_001032296 | ref Homo sapiens serine/threonine kinase 24 (STE20 homolog, yeast) (STK24), transcript variant 2, mRNA [NM_001032296]  | -0.61 | 12.97 | -5.89 | 0        | 0.03 |
| A_23_P65651  | WARS       | NM_004184    | ref Homo sapiens tryptophanyl-tRNA synthetase (WARS), transcript variant 1, mRNA [NM_004184]                           | -0.61 | 13.78 | -4.68 | 0        | 0.05 |
| A_24_P508012 | TAF3       | AK123254     | gb Homo sapiens cDNA FLJ41260 fis, clone BRAMY2034561. [AK123254]                                                      | -0.61 | 8.28  | -6.58 | 8.41E-05 | 0.02 |
| A_23_P64661  | ARHGAP9    | NM_032496    | ref Homo sapiens Rho GTPase activating protein 9 (ARHGAP9), transcript variant 1, mRNA [NM_032496]                     | -0.61 | 11.18 | -4.6  | 0        | 0.05 |
| A_23_P389391 | SLC12A4    | NM_005072    | solute carrier family 12 (potassium/chloride transporters), member 4 (SLC12A4), mRNA [NM_005072]                       | -0.61 | 9.11  | -4.62 | 0        | 0.05 |
| A_32_P103131 | THC2608658 | THC2608658   | thc AF195969 rho GTPase activating protein 8 isoform 2 {Homo sapiens} (exp=-1; wgp=0; cg=0), partial (6%) [THC2608658] | -0.61 | 10.25 | -7.12 | 4.51E-05 | 0.02 |
| A_23_P55564  | ZCCHC2     | BC006340     | gb Homo sapiens zinc finger, CCHC domain containing 2, mRNA (cDNA clone IMAGE:4079754), complete cds. [BC006340]       | -0.61 | 8.71  | -4.66 | 0        | 0.05 |
| A_23_P52939  | SLC43A1    | NM_003627    | ref Homo sapiens solute carrier family 43, member 1 (SLC43A1), mRNA [NM_003627]                                        | -0.61 | 10.95 | -4.75 | 0        | 0.04 |
| A_23_P103919 | B4GALT3    | NM_003779    | ref Homo sapiens UDP-Gal:betaGlcNAc beta 1,4-galactosyltransferase, polypeptide 3 (B4GALT3), mRNA [NM_003779]          | -0.6  | 12.56 | -4.94 | 0        | 0.04 |
| A_24_P79955  | RBM8A      | NM_005105    | ref Homo sapiens RNA binding motif protein 8A (RBM8A), mRNA [NM_005105]                                                | -0.6  | 11.74 | -6.96 | 5.39E-05 | 0.02 |

|              |      |           |                                                                                                                        |      |       |       |   |      |
|--------------|------|-----------|------------------------------------------------------------------------------------------------------------------------|------|-------|-------|---|------|
| A_23_P154566 | TOX2 | NM_032883 | ref[Homo sapiens TOX high mobility group box family member 2 (TOX2), transcript variant 3, mRNA [NM_032883]]           | -0.6 | 13.03 | -5.34 | 0 | 0.03 |
| A_23_P42746  | NCF1 | NM_000265 | ref[Homo sapiens neutrophil cytosolic factor 1, (chronic granulomatous disease, autosomal 1) (NCF1), mRNA [NM_000265]] | -0.6 | 10.28 | -4.83 | 0 | 0.04 |



## Supplementary Materials and Methods:

### Leukemic cell line MTS assays

Myeloid leukemic cell lines were infected with lentiviral vectors encoding anti- *MSI2* shRNAs and then selected based on puromycin resistance conferred by the lentiviral vectors. We plated  $1 \times 10^5$  infected cells and performed MTS proliferation assays with background absorbance values subtracted and normalized to day 0. Cell growth was assessed with the MTS reagent Promega as previously performed<sup>1</sup>.

### Human Patient Data

CML data was obtained from previously published studies<sup>2,3</sup> through Oncomine.com and GEO. Previously published AML patient data was accessed through gene expression omnibus (GEO: GSE16432)<sup>4,5</sup>. In addition, RNA from adult AML patients with extensive clinical, cytogenetic and molecular genetic characterization was provided by the German-Austrian AML Study Group (AMLSG) with patient informed consent and institutional review board approval from all participating centers. CN-AML from this dataset was used to select the top 15 *MSI2* expressing samples and 15 lowest *MSI2* expressing samples and these were used for the “CN-AML High and Low *MSI2* dataset.” Gene expression and clinical and outcome data for the 163 adult AML patients with normal cytogenetics (Affymetrix HG-U133B)<sup>6</sup> was downloaded from the Gene Expression Omnibus (GEO accession number GSE12417). This cohort was used as an independent dataset. We first normalized raw data using CEL files. *MSI2* probe intensities were collapsed into a single value using the highest intensity. The resulting value was log transformed (base2) and mean centered across arrays. Positive and negative *MSI2*

expression levels for each individual were matched with survival data. Kaplan-Meier plot was created with Graphpad software.

#### Ba/F3 IL-3 Withdrawal Assay

We transduced BaF3 cells with retroviral vectors expressing indicated empty virus MSCVIRESE GFP (MIG) and *MSI2*, and sorted by flow cytometry for EGFP<sup>+</sup> cells. Cells were washed 3 times with 1X PBS after IL-3 was withdrawn and were counted at day 4 using a hemocytometer.

#### Quantitative PCR

mRNA was isolated from populations using TRIZOL and Qiagen RNEASY and reverse transcribed into cDNA with iSCRIPT (BioRad). Quantitative PCR was performed as previously described. Primers for *MSI1* and *MSI2* are *MSI1*(F) 5'-CACTTCCATGAAATCAACAACAA-3', (R) 5'-GGCTGGGCTTTCTTGCATT-3' *MSI2* (F) 5'-ACGACTCCCAGCACGACC-3', (R) 5'-GCCAGCTCAGTCCACCGATA-3'.

#### *MSI2* Inducible Knock-in Generation

Human *MSI2* cDNA from open biosystems clone ID#5942 Accession CV027635 in pDONR223 *MSI2* (CCDS 11596.1) was cloned into the unique EcoRI restriction site of the pBS31 vector containing a PGK promoter followed by an ATG start codon and an frt site, followed by a splice acceptor-double polyA cassette, the tetracycline operator with a CMV minimal promoter, the unique EcoRI site for cDNA insertion, and an SV40 polyA signal. The pBS31-*MSI2* vector was then electroporated along with a Flpe recombinase

expressing vector into KH2 embryonic stem cells harboring the M2-rtTA at the *ROSA26* locus under control of the *ROSA26* promoter, as well as an frt-flanked PGK-neomycinR cassette followed by a promoterless, ATG-less hygromycinR cassette targeted downstream of the *Collagen1a1* locus. Selection for hygromycin resistance yielded numerous colonies which were verified for proper flip-in to the *Coll1a1* locus by digestion of genomic DNA followed by southern blotting with a 3' internal probe, yielding a 6.2 kb wildtype band, a 6.7 kb band for the frt-containing knockin allele, and a 4.1 kb band for the successfully flipped-in *MSI2* inducible allele. Activation of the *TetO-MSI2* allele was carried out in vivo by administration of 2mg/mL doxycycline hyclate (Sigma D9891) along with 10mg/mL sucrose in the drinking water. *In vitro* activation was performed by addition of 0.5-2ug/mL doxycycline to the culture media.

#### BCR-ABL1 Leukemia Assay

All mice were housed in a pathogen-free animal facility in microisolator cages, and experiments were conducted based on a protocol approved by the Institutional Animal Care and Use Committee (IACUC). Murine BMT experiments were performed as previously described<sup>24</sup>. We injected *MSI2* inducible 6-8 week old C57 Bl/6 SJL donor mice with a single IP injection of 5-FU (Sigma) at 0.15mg/g body weight on day -8. We sacrificed donor mice at day -2, and BM was then harvested. After red cell lysis in RBC lysis buffer (Puregene), the bone marrow was stimulated overnight in transplant media composed of RPMI/10%FBS and murine IL3, IL6, and SCF. The bone marrow was then transduced twice with the retroviral supernatant by spinfection with polybrene and HEPES and centrifuged at 2500RPM at 33°C for 90 minutes. The transduced bone

marrow was then washed and resuspended in Hank's solution. 6-8 week old C57 Bl/6 recipient mice were lethally irradiated with 2 doses of irradiation at 650 rads on day 0, and then we injected  $1 \times 10^6$  donor bone marrow cells into the tail vein of each mouse. We allowed the cells to home and lodge for 3 days prior to dox administration.

### Hematopoietic Histopathology

Peripheral blood was collected from the retroorbital cavity using a heparinized glass capillary tube. Complete peripheral blood count analysis including a differential blood count was obtained using Hemavet (Drew Scientific). For histological analysis, peripheral blood smears were stained with Wright-Giemsa stain. We euthanized and collected the relevant organs, fixed in 10% formalin and paraffin embedded. The histopathology core facility (Brigham and Women's Hospital) provided  $4\mu\text{m}$  sections that were stained by hematoxylin and eosin (H&E). We acquired digital images using a Nikon Eclipse E400 microscope equipped with a digital camera and analyzed them using Spot Advanced software.

### Viral Supernatant Production

We maintained Ba/F3 cells in RPMI 1640 media with 10% FCS and either interleukin-3 (IL-3) (0.5 ng/mL; R&D Systems, Minneapolis, MN) or WEHI-conditioned media as a source of IL-3. We generated retroviral stocks by transfecting 293T cells with Fugene (Roche), and viral titers were then determined as previously described<sup>2,7</sup>.

### Flow Cytometry

We harvested bone marrow cells or splenocytes and subjected them to red cell lysis. We stained fresh or cryopreserved cells with the following antibodies: CD45.2-FITC and CD45.1-APC, Mac1-PE, Gr1-APC, c-Kit-APC, CD71-PE, Ter119-APC, B220-PE, and CD3-APC (Becton-Dickinson) and analyzed them on the BD FACSCalibur instrument. Staining for multiparameter flow cytometry was performed as previously described<sup>8</sup>. Lineage negative cocktail includes the following purified rat antibodies: (Lin<sup>-</sup>; B220, CD4, CD8, CD3, Gr1, CD19, TER119). Mac1 was not included in the lineage cocktail. We depleted antibody-treated cells with rat-specific Dynal beads and then stained the cells with rat-specific PE-Cy5.5. Finally, we analyzed and sorted cells with the BD FACSAria instrument. For progenitor populations in **Fig. 1a** the populations were gated and sorted with indicated markers: GMP (LK, FcγRIIb<sup>hi</sup> CD34<sup>+</sup>), CMP (LK, FcγRIIb<sup>mid</sup> CD34<sup>+</sup>), MEP (LK, FcγRIIb<sup>low</sup> CD34<sup>-</sup>), B-cells (B220<sup>+</sup>) and T-cells (CD3<sup>+</sup>).

#### Microarray Analysis in Primary AML cells

Gene expression profiling (GEP) was performed as previously described using the Stanford cDNA microarray platform<sup>4</sup>. Following Ficoll enrichment all samples contained at least 80% leukemic cells. Normalization and filtering of the data has been performed reported elsewhere<sup>4</sup>. The complete gene expression microarray dataset is available at the Stanford Microarray Database (<http://smd.stanford.edu>)<sup>28</sup>.

#### Microarray Analysis in normal LSK and Progenitors

We hybridized RNA isolated from adult murine hematopoietic stem and progenitor cells (Lineage<sup>Low</sup>, Sca1<sup>+</sup>, Kit<sup>+</sup>; LSK) and committed progenitor cells (Lineage<sup>Low</sup>, Sca1<sup>-</sup>, Kit<sup>+</sup>;

LK) on mouse Expression Array 430A 2.0 (Affymetrix). Raw CEL data were normalized by RMA method. A t-test was used to determine significant differences in gene expression between the samples.

#### Microarray Analysis of *MSI2* Expression in Inducible Mice.

Hematopoietic stem and progenitor cells (Lineage<sup>Low</sup>, Sca1<sup>+</sup>, Kit<sup>+</sup>; LSK) treated with doxycycline for 36 hours were sorted from control *rtTA* and *MSI2* mice. Cells were directly sorted into TRIZOL and then further isolated with QiagenRNEASY. RNA was then amplified using a NUGEN Pico amplification kit, fragmented and hybridized on Mouse Expression Array 430 2.0. Signal normalization was performed by RMA method. Data was analyzed using GSEA across the complete list of genes ranked by signal-to-noise ratio. (Microarray data is representative of n=3 *rtTA* mice and n=2 *MSI2* doxycycline treated animals.)

#### Microarray Analysis in *MSI2* knockdown

Agilent's Feature Extraction Software was used for array image analysis and the calculation of spot intensity measurements. We used the linear model for microarray data (LIMMA) Bioconductor package<sup>9</sup> to normalize the samples using loess and quantile methods within and between arrays respectively and empirical Bayes moderated t-statistics were used to detect genes differentially expressed. We considered genes regulated by *MSI2* knock-down with fold change > 1.5 and FDR p-value < 0.05 for components of *MSI2* gene expression signature. Then, we performed gene set enrichment analysis using GSEA across the complete list of genes ranked by t-statistic<sup>10</sup>.

### *MSI2* signature and Survival Analysis

We matched *MSI2* signature genes to the corresponding probes id in AML dataset and log<sub>2</sub> values were standardized by taking the mean value for each gene across the sample set. This *MSI2* signature was used to cluster the AML dataset using an unsupervised hierarchical method (by the “heatmap.plus” function of “gplots” package of R). We classified the two main clusters by positive or negative representation of the *MSI2* signature and then matched it with the survival data. Statistical significance was calculated by log rank test and Kaplan-Meier plots were created with Graphpad software (La Jolla, CA). We also examined the predictive value of *MSI2* expression when a validation cohort of CN-AML samples<sup>6</sup> was divided into low and high *MSI2* expression groups based on expression relative to the mean. Higher *MSI2* expression value was associated with worse overall survival (p=0.0004; Fig. 4h).

### Multivariate Cox Regression analysis

We assessed the prognostic value of *MSI2* expression as an individual marker by a multivariate Cox-proportional hazard model analysis with overall survival and event-free survival as the dependant variable and FLT3-ITD/NPM1 status, age, FAB classification, cytogenetic group and continuous expression level of *MSI2* as directly assessed independent variables. We used the Wald test to assess the significance of each covariate in multivariate analysis. We performed a multivariate proportional-hazard analyses using the *coxph* function from R package *survival*.

### Cobblestone area-forming Assay

We performed CAFC assays as described in <sup>11</sup>. In short, we plated bone-marrow cells in 96 flat bottom wells in limiting dilutions on top of confluent OP9 stroma at the indicated doses of bone marrow cells:  $1 \times 10^4$ ,  $4 \times 10^4$ ,  $8 \times 10^4$ ,  $16 \times 10^4$  with 12 replicates per dose. The number of cobblestone positive wells per dose were enumerated and at 2 weeks post-plating. L-Calc software (StemCell Technologies) was used to calculate frequency and p-values between groups.

### In vitro LT-HSC and MPP proliferation and apoptosis Assay

We sorted 2000 LT-HSC (SLAMF7<sup>+</sup>) and MPP (CD150<sup>-</sup> CD48<sup>-</sup> LSK) into STIF medium in a round bottom plate and counted at day 5. Then we analyzed the cells stained for Annexin/PI to assess apoptosis.

### Supplementary Methods Reference:

1. Scholl, C. et al. Synthetic lethal interaction between oncogenic KRAS dependency and STK33 suppression in human cancer cells. *Cell* 137, 821-34 (2009).
2. Radich, J. P. et al. Gene expression changes associated with progression and response in chronic myeloid leukemia. *Proc Natl Acad Sci U S A* 103, 2794-9 (2006).
3. Kang, H. et al. Gene expression classifiers for relapse-free survival and minimal residual disease improve risk classification and outcome prediction in pediatric B-precursor acute lymphoblastic leukemia. *Blood* (2009).
4. Bullinger, L. et al. Use of gene-expression profiling to identify prognostic subclasses in adult acute myeloid leukemia. *N Engl J Med* 350, 1605-16 (2004).
5. Bullinger, L. et al. An FLT3 gene-expression signature predicts clinical outcome in normal karyotype AML. *Blood* 111, 4490-5 (2008).
6. Metzeler, K. H. et al. An 86-probe-set gene-expression signature predicts survival in cytogenetically normal acute myeloid leukemia. *Blood* 112, 4193-201 (2008).
7. Kelly, L. M. et al. FLT3 internal tandem duplication mutations associated with human acute myeloid leukemias induce myeloproliferative disease in a murine bone marrow transplant model. *Blood* 99, 310-8 (2002).
8. Tothova, Z. et al. FoxOs are critical mediators of hematopoietic stem cell resistance to physiologic oxidative stress. *Cell* 128, 325-39 (2007).



9. Smyth, G. K. Limma: linear models for microarray data. In: *Bioinformatics and Computational Biology Solutions using R and Bioconductor*, (ed. R. Gentleman, V. C., S. Dudoit, R. Irizarry, W. Huber ) (Springer, New York, 2005), pages 397-420.
10. Subramanian, A. et al. Gene set enrichment analysis: a knowledge-based approach for interpreting genome-wide expression profiles. *Proc Natl Acad Sci U S A* 102, 15545-50 (2005).
11. Moore, K. A., Ema, H. & Lemischka, I. R. In vitro maintenance of highly purified, transplantable hematopoietic stem cells. *Blood* 89, 4337-47 (1997).
